# Supplementary material for: Human Wharton’s Jelly Mesenchymal Stem Cells Secretome Inhibits Human SARS-CoV-2 and Avian Infectious Bronchitis Coronaviruses
Source: MDPI journal article supplement (doi:10.3390/cells11091408), 2022-04-21
Supplement: s1 [file s1]

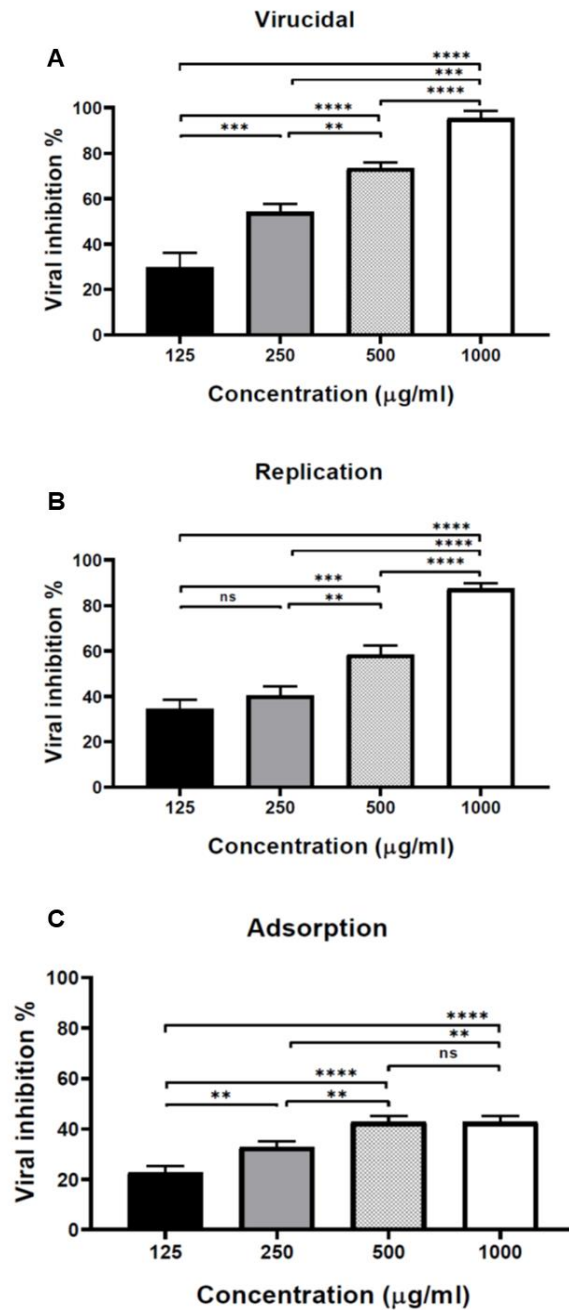

**Figure S1.** Comparison between different concentrations of WJ-MSC-S against SARS-CoV-2 using different antiviral assays. Virucidal (A), anti-replication (B), and anti-adsorption (C). Results are shown as means  $\pm$  SD of three independent experiments, each run in triplicate. \* $p < 0.05$ , \*\* $p < 0.01$ , \*\*\* $p < 0.001$ , \*\*\*\* $p < 0.0001$  indicated the significant correlation among different concentrations of WJ-MSC-S.

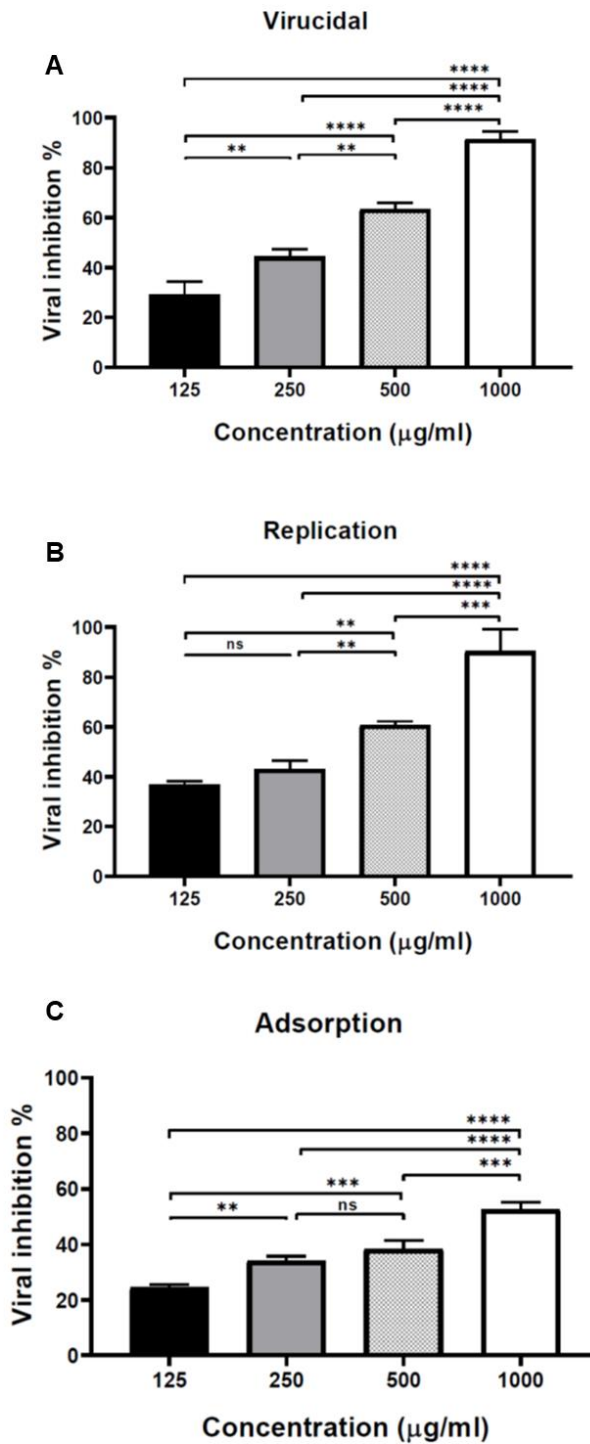

**Figure S2.** Comparison between different concentrations of WJ-MSC-S against IBV using different antiviral assays. Virucidal (A), anti-replication (B), and anti-adsorption (C). Results are shown as means  $\pm$  SD of three independent experiments, each run in triplicate. \* $p < 0.05$ , \*\* $p < 0.01$ , \*\*\* $p < 0.001$ , \*\*\*\* $p < 0.0001$  indicated the significant correlation among different concentrations of WJ-MSC-S.
