# Supplementary material for: Human Wharton’s Jelly Mesenchymal Stem Cells Secretome Inhibits Human SARS-CoV-2 and Avian Infectious Bronchitis Coronaviruses
Source: Cells. 2022 Apr 21;11(9):1408. doi: 10.3390/cells11091408 (PMC9101656; doi:10.3390/cells11091408)
Supplement: Supplementary file 1 [file cells-11-01408-s001.zip › Table S2.xlsx]

## Sheet: NSAF
	MainAccesion	Possible.Coverage....	Coverage....	Confident.Coverage....	Spectrum.Counting	Spectrum.Counting.NSAF	Spectrum.Counting.emPAI	Spectrum.Counting.NSAF....	Spectrum.Counting.emPAI....	Spectrum.Counting.NSAF..ppm.	Spectrum.Counting.emPAI..ppm.	Spectrum.Counting.NSAF..fmol.	Spectrum.Counting.emPAI..fmol.	Confidence....	X.Validated.Peptides	X.Peptides	X.Unique	X.Validated.Unique	X.Unique.to.Group	X.Validated.Unique.to.Group	X.Validated.PSMs	X.PSMs	Description	Gene.Name	GO.Accession	MW..kDa.
1	A0A087WSW9	94.71	4.2	4.2	46.442	0.00182482	0.0372251	0.0646383	1.31858	646.383	13185.8	46.442	947.387	98.75	1	1	1	1	1	1	1	1	Thioredoxin-disulfide reductase (A0A087WSW9_HUMAN)	TXNRD1		60.0408
2	A0A087WT78	90.55	1.73	1.73	22.3232	0.000980392	0.0217527	0.0304909	0.692631	304.909	6926.31	22.3232	499.686	96.6634	1	2	0	0	0	0	2	3	Endoplasmin (A0A087WT78_HUMAN)	HSP90B1		86.5363
3	A0A087WTA8	76.4933	34.4567	28.7633	207.085	0.00871239	1.10309	0.287418	36.1383	2874.18	361383	207.085	26104.7	98.8863	37	45	0	0	15	12	93	109	Collagen alpha-2(I) chain (A0A087WTA8_HUMAN)	COL1A2		129.072
4	A0A087WTJ7	100	16.98	16.98	224.505	0.00943396	0.110336	0.311648	3.64493	3116.48	36449.3	224.505	2625.74	98.8863	1	1	0	0	0	0	1	2	Tropomyosin alpha-1 chain (A0A087WTJ7_HUMAN)	TPM1		12.0872
5	A0A087WUV5	100	24	24	136.777	0.00555556	0.211528	0.192122	7.27061	1921.22	72706.1	136.777	5163.88	99.1392	1	1	0	0	1	1	1	1	Lactadherin (Fragment) (A0A087WUV5_HUMAN)	MFGE8		8.77137
6	A0A087WV01	55.16	4.69667	3.91333	111.22	0.0046875	0.0800283	0.155075	2.63898	1550.75	26389.8	111.22	1911.44	96.9414	2	2	0	0	0	0	3	3	Elongation factor 1-alpha (A0A087WV01_HUMAN)	EEF1A1		46.3307
7	A0A087WVQ9	65.58	5.23	5.23	41.6987	0.00172712	0.0391223	0.0576592	1.29239	576.592	12923.9	41.6987	931.016	98.8863	1	1	0	0	0	0	2	2	Elongation factor 1-alpha (A0A087WVQ9_HUMAN)	EEF1A1		49.838
8	A0A087WW43	77.91	1.865	0.97	62.4559	0.00259516	0.0324972	0.0882923	1.11699	882.923	11169.9	62.4559	793.332	96.9712	1	3	3	1	3	1	3	4	Inter-alpha-trypsin inhibitor heavy chain H3 (A0A087WW43_HUMAN)	ITIH3		75.0311
9	A0A087WWT3	100	9.09	9.09	851.387	0.033453	0.719072	1.18497	25.4708	11849.7	254708	851.387	18300.6	98.75	12	16	4	3	4	3	42	57	Albumin (A0A087WWT3_HUMAN)	ALB		45.1184
10	A0A087WWU8	100	5.73	5.73	142.207	0.00587371	0.0563541	0.197542	1.86164	1975.42	18616.4	142.207	1341.09	98.8863	1	1	0	0	0	0	2	2	Tropomyosin alpha-3 chain (A0A087WWU8_HUMAN)	TPM3		26.4044
11	A0A087WYX9	74.37	2.07	2.07	26.9886	0.00106044	0.024022	0.0375629	0.850901	375.629	8509.01	26.9886	611.365	98.75	1	4	0	0	4	1	1	4	Collagen alpha-2(V) chain (A0A087WYX9_HUMAN)	COL5A2		106.918
12	A0A087WYZ9	96.385	2.78	1.39	24.1018	0.00104312	0.0363215	0.0337289	1.1383	337.289	11383	24.1018	829.391	93.6661	2	2	2	2	2	2	1	23	Histone-lysine N-methyltransferase SETDB2 (A0A087WYZ9_HUMAN)	SETDB2		81.8544
13	A0A087X0S5	83.82	4.71	4.16	98.3765	0.00418544	0.0886535	0.135695	2.9221	1356.95	29221	98.3765	2119.36	98.8863	4	7	0	0	0	0	8	10	Collagen alpha-1(VI) chain (A0A087X0S5_HUMAN)	COL6A1		108.272
14	A0A087X232	73.75	2.79	1.86	77.2226	0.00331345	0.0485125	0.105914	1.56929	1059.14	15692.9	77.2226	1139.17	97.5845	2	2	1	1	1	1	2	3	Complement C1s subcomponent (A0A087X232_HUMAN)	C1S		75.8565
15	A0A087X243	100	28.99	28.99	353.802	0.0144928	0.584893	0.498144	20.1039	4981.44	201039	353.802	14278.6	99.1392	1	1	0	0	1	1	2	2	Glutathione S-transferase P (Fragment) (A0A087X243_HUMAN)	GSTP1		7.44466
16	A0A0A0MQX7	91.51	2.65	2.65	98.1221	0.00434783	0.0513302	0.132001	1.5584	1320.01	15584	98.1221	1158.42	94.1489	1	1	0	0	1	1	3	3	Testican-1 (A0A0A0MQX7_HUMAN)	SPOCK1		42.1922
17	A0A0A0MRG2	70.3	7.07	6.26333	57.5296	0.00245142	0.132777	0.0799077	4.31711	799.077	43171.1	57.5296	3127.99	98.8863	4	5	0	0	0	0	6	6	Amyloid-beta A4 protein (A0A0A0MRG2_HUMAN)	APP		75.0624
18	A0A0A0MRQ5	100	36.085	21.135	417.904	0.0173294	0.811117	0.59044	27.5192	5904.4	275192	417.904	19444.9	96.1821	3	6	0	0	3	1	6	11	Peroxiredoxin-1 (A0A0A0MRQ5_HUMAN)	PRDX1		10.6695
19	A0A0A0MSI0	100	23.1	12.28	247.694	0.0108187	0.595408	0.341449	18.6877	3414.49	186877	247.694	13603.5	93.0176	4	8	4	3	4	3	7	14	Peroxiredoxin-1 (Fragment) (A0A0A0MSI0_HUMAN)	PRDX1		18.9637
20	A0A0C4DGB6	95.53	3.64	1.99	117.698	0.00521523	0.146895	0.158336	4.45978	1583.36	44597.8	117.698	3315.15	98.3806	5	6	0	0	0	0	9	16	Albumin (A0A0C4DGB6_HUMAN)	ALB		69.1814
21	A0A0C4DGG5	68.95	2.74	2.74	176.078	0.00753296	0.0284783	0.251014	0.948955	2510.14	9489.55	176.078	665.662	91.5761	1	1	1	1	1	1	4	6	Rho GTPase-activating protein 20 (A0A0C4DGG5_HUMAN)	ARHGAP20		80.8469
22	A0A0F7G8J1	88.26	2.88	1.73	56.3481	0.00233427	0.0683249	0.0787542	2.25457	787.542	22545.7	56.3481	1629.68	95.937	3	4	4	3	4	3	4	6	Plasminogen (A0A0F7G8J1_HUMAN)	PLG		90.5692
23	A0A0G2JL54	73.085	1.35	1.35	17.9575	0.000747943	0.0133987	0.0246006	0.440697	246.006	4406.97	17.9575	321.692	98.5653	1	2	1	1	2	1	1	2	C4a anaphylatoxin (A0A0G2JL54_HUMAN)	C4B_2		187.598
24	A0A0G2JPA8	56.67	4.805	3.515	175.716	0.00743494	0.160155	0.249699	5.50485	2496.99	55048.5	175.716	3909.76	96.0985	2	3	3	2	3	2	3	5	Alpha-2-antiplasmin (A0A0G2JPA8_HUMAN)	SERPINF2		47.9066
25	A0A0J9YWE8	79.19	20.13	14.765	183.287	0.00794492	0.333521	0.255851	10.6197	2558.51	106197	183.287	7661.4	98.9544	3	3	0	0	2	2	6	7	14-3-3 protein beta/alpha (A0A0J9YWE8_HUMAN)	YWHAB		17.3987
26	A0A0J9YXB8	100	8.38	8.38	388.67	0.0159681	0.258925	0.539125	8.55352	5391.25	85535.2	388.67	6161.8	98.8863	2	2	0	0	0	0	4	6	Prosaposin (Fragment) (A0A0J9YXB8_HUMAN)	PSAP		18.8422
27	A0A0S2Z3K0	74.9	3.395	3.395	150.936	0.00633413	0.0956529	0.206332	3.2301	2063.32	32301	150.936	2344.37	96.2418	2	2	0	0	0	0	3	3	Collagen type I alpha 2 isoform 5 (Fragment) (A0A0S2Z3K0_HUMAN)	COL1A2		44.4965
28	A0A0S2Z4G6	100	6.16	4.575	63.4045	0.00264085	0.089023	0.0868601	2.92806	868.601	29280.6	63.4045	2137.37	96.402	2	3	0	0	0	0	2	3	Tropomyosin 1 (Alpha), isoform CRA_o (Fragment) (A0A0S2Z4G6_HUMAN)	TPM1		32.7066
29	A0A0U1RRM9	100	6.29	0	0	0	0.0680004	0	2.26592	0	22659.2	0	1589.47	92.2006	1	2	2	1	2	1	0	11	Transforming acidic coiled-coil-containing protein 2 (Fragment) (A0A0U1RRM9_HUMAN)	TACC2		20.4526
30	A0A1B0GU03	71.48	6.27	4.725	138.082	0.00570913	0.146215	0.189554	4.67827	1895.54	46782.7	138.082	3435.97	93.9683	3	5	3	2	5	3	4	6	Peptidase A1 domain-containing protein (A0A1B0GU03_HUMAN)			62.6616
31	A0A1B0GVI3	65.06	11.5367	9.13333	158.082	0.00667961	0.279914	0.219598	8.99562	2195.98	89956.2	158.082	6545.77	97.3486	6	13	10	5	13	6	10	17	Keratin, type I cytoskeletal 10 (A0A1B0GVI3_HUMAN)	KRT10		63.308
32	A0A1W2PQM2	80	5.94667	5.94667	69.8126	0.0029036	0.0608184	0.0974727	2.00912	974.727	20091.2	69.8126	1447.33	98.8863	1	1	0	0	1	1	1	1	Tubulin alpha-1C chain (A0A1W2PQM2_HUMAN)	TUBA1C		36.6278
33	A0A2R8Y4I5	66.44	3.4	2.40333	44.541	0.00188406	0.0640156	0.0614224	2.08349	614.224	20834.9	44.541	1501.78	98.8863	2	4	0	0	4	2	2	4	Collagen alpha-1(XI) chain (A0A2R8Y4I5_HUMAN)	COL11A1		77.7851
34	A0A2R8Y5V9	100	10.3467	4.03333	297.701	0.0125448	0.186318	0.413409	6.10039	4134.09	61003.9	297.701	4408.83	97.2517	4	4	0	0	0	0	6	7	Tropomyosin alpha-4 chain (A0A2R8Y5V9_HUMAN)	TPM4		28.5915
35	A0A2R8Y6G6	93.09	29.7967	25.1133	297.766	0.0125789	0.4165	0.413685	13.6972	4136.85	136972	297.766	9894.42	98.8863	8	12	0	0	0	0	15	19	2-phospho-D-glycerate hydro-lyase (A0A2R8Y6G6_HUMAN)	ENO1		47.2973
36	A0A2R8Y793	81.23	3.56	3.56	242.547	0.0101672	0.431652	0.336952	14.2491	3369.52	142491	242.547	10287.6	96.3198	5	5	0	0	0	0	15	17	Actin, cytoplasmic 1 (Fragment) (A0A2R8Y793_HUMAN)	ACTB		34.1198
37	A0A2R8Y798	100	44.29	44.29	1773.21	0.0785714	0.425103	2.38545	12.9062	23854.5	129062	1773.21	9593.76	98.3806	2	2	0	0	0	0	7	7	Alpha-enolase (A0A2R8Y798_HUMAN)	ENO1		7.98006
38	A0A2R8Y7C0	78.36	11.565	11.565	255.636	0.011194	0.154782	0.350905	4.92844	3509.05	49284.4	255.636	3555.53	98.9544	1	1	0	0	1	1	2	2	Hemoglobin subunit alpha (Fragment) (A0A2R8Y7C0_HUMAN)	HBA2		13.9441
39	A0A2R8Y7R2	100	8.11	8.11	229.281	0.00900901	0.211528	0.319115	7.49269	3191.15	74926.9	229.281	5383.43	98.75	1	1	0	0	1	1	1	2	Hemoglobin subunit beta (A0A2R8Y7R2_HUMAN)	HBB		12.1682
40	A0A2R8Y879	100	18.4	18.4	481.453	0.0213333	0.43845	0.647685	13.3114	6476.85	133114	481.453	9894.98	98.3806	3	4	0	0	0	0	5	6	Alpha-enolase (Fragment) (A0A2R8Y879_HUMAN)	ENO1		13.4871
41	A0A2R8YE05	88.5	12.39	8.85	149.788	0.00663717	0.128838	0.201506	3.91155	2015.06	39115.5	149.788	2907.63	94.086	2	2	0	0	0	0	2	3	Tropomyosin alpha-4 chain (A0A2R8YE05_HUMAN)	TPM4		26.0182
42	A0A2R8YFE2	100	10.13	10.13	966.465	0.0379747	0.232847	1.34513	8.24785	13451.3	82478.5	966.465	5926	90.1408	1	1	0	0	0	0	3	3	Actin, cytoplasmic 1 (Fragment) (A0A2R8YFE2_HUMAN)	ACTB		8.78146
43	A0A2U3TZL5	68.33	10	10	290.214	0.0121951	0.258925	0.402862	8.55352	4028.62	85535.2	290.214	6161.8	98.8863	1	2	1	1	2	1	2	2	CD59 glycoprotein (Fragment) (A0A2U3TZL5_HUMAN)	CD59		13.3344
44	A0A384MR03	65.09	3.78333	3.55333	81.8807	0.00341898	0.10972	0.113691	3.58252	1136.91	35825.2	81.8807	2594.48	98.8863	8	10	0	0	0	0	18	20	Fibronectin (A0A384MR03_HUMAN)			239.471
45	A0A3B3IRV2	54.84	22.58	0	499.024	0.0196078	0.258925	0.694545	9.1716	6945.45	91716	499.024	6589.71	98.75	1	1	0	0	1	1	1	1	Collagen alpha-2(IV) chain (Fragment) (A0A3B3IRV2_HUMAN)	COL4A2		8.88923
46	A0A3B3ISR2	75.18	1.7	1.7	20.0123	0.000856164	0.0339338	0.0285292	1.13075	285.292	11307.5	20.0123	793.183	99.5283	1	1	0	0	1	1	1	1	Complement subcomponent C1r (A0A3B3ISR2_HUMAN)	C1R		80.1219
47	A0A3B3ISV3	60.88	4.15	4.15	43.0689	0.0019084	0.089023	0.0579394	2.70276	579.394	27027.6	43.0689	2009.08	98.3806	1	1	0	0	0	0	1	1	Collagen alpha-1(IV) chain (Fragment) (A0A3B3ISV3_HUMAN)	COL4A1		39.8153
48	A0A3B3IT80	77.69	12.4	12.4	186.513	0.00826446	0.211528	0.250911	6.42203	2509.11	64220.3	186.513	4773.78	98.3806	1	1	0	0	0	0	2	2	Collagen alpha-2(IV) chain (Fragment) (A0A3B3IT80_HUMAN)	COL4A2		11.3278
49	A0A3B3ITK0	67.37	1.785	1.275	22.0455	0.000955754	0.0348555	0.0307654	1.09237	307.654	10923.7	22.0455	795.918	96.7107	2	3	0	0	1	1	3	4	Thrombospondin-2 (A0A3B3ITK0_HUMAN)	THBS2		130.44
50	A0A3B3ITY6	64.08	4.83	4.83	212.973	0.0083682	0.0577676	0.296417	2.04623	2964.17	20462.3	212.973	1470.2	98.75	1	3	0	0	0	0	2	4	Calsyntenin-1 (Fragment) (A0A3B3ITY6_HUMAN)	CLSTN1		41.3625
51	A0A3B3IU48	75.44	1.13	0	27.759	0.00123001	0.0242752	0.0373435	0.737002	373.435	7370.02	27.759	547.845	93.6675	1	1	1	1	1	1	1	13	MAM domain-containing glycosylphosphatidylinositol anchor protein 1 (A0A3B3IU48_HUMAN)	MDGA1		107.785
52	A0A3B3IUE0	100	18.52	18.52	453.51	0.0185185	0.193777	0.624715	6.37351	6247.15	63735.1	453.51	4652.41	98.5653	1	2	2	1	2	1	2	2	Insulin-like growth factor-binding protein 6 (A0A3B3IUE0_HUMAN)	IGFBP6		8.9412
53	A0A499FI48	93.5	0.93	0.93	17.4676	0.000773994	0.0137297	0.0234986	0.416838	234.986	4168.38	17.4676	309.854	93.0623	1	2	2	1	2	1	1	2	Protein disulfide-isomerase (A0A499FI48_HUMAN)	PDIA4		73.015
54	A0A5F9UJX7	61.88	0	0	0	0	0	0	0	0	0	0	0	93.7313	0	2	0	0	2	0	2	2	45 kDa calcium-binding protein (A0A5F9UJX7_HUMAN)	SDF4		38.7134
55	A0A5F9UN72	100	5.06	0	147.939	0.00632911	0.0857111	0.210899	2.85607	2108.99	28560.7	147.939	2003.44	91.5601	1	3	0	0	0	0	2	5	Tropomyosin 4, isoform CRA_c (A0A5F9UN72_HUMAN)	TPM4		18.3583
56	A0A5K1VW95	79.6	4.82	0	249.549	0.0106762	0.0502111	0.355752	1.67314	3557.52	16731.4	249.549	1173.65	93.0435	1	1	0	0	1	1	3	5	Malate dehydrogenase (A0A5K1VW95_HUMAN)	MDH1		38.593
57	A0A6Q8PF43	73.05	14.895	14.895	520.974	0.0218447	0.244152	0.71235	7.80422	7123.5	78042.2	520.974	5733.09	98.5653	2	2	1	1	1	1	3	3	Heat shock protein beta-1 (A0A6Q8PF43_HUMAN)	HSPB1		15.8981
58	A0A6Q8PF58	51.02	1.77	1.77	26.242	0.00116279	0.0404983	0.0353026	1.22954	353.026	12295.4	26.242	913.97	98.3806	1	1	0	0	0	0	1	2	Cadherin-2 (A0A6Q8PF58_HUMAN)	CDH2		81.2104
59	A0A6Q8PFK8	66.67	13.64	5.05	211.576	0.009375	0.258925	0.284627	7.86104	2846.27	78610.4	211.576	5843.45	94.0379	2	2	0	0	0	0	2	2	Heat shock protein beta-1 (A0A6Q8PFK8_HUMAN)	HSPB1		21.8691
60	A0A7I2V2J1	100	17.7433	17.7433	343.933	0.0143885	0.347994	0.474286	11.4737	4742.86	114737	343.933	8314.04	98.8863	2	2	0	0	0	0	3	3	Cathepsin B (A0A7I2V2J1_HUMAN)	CTSB		15.5336
61	A0A7I2V440	67.7	4.68333	4.68333	146.877	0.00615006	0.11673	0.202812	3.9302	2028.12	39302	146.877	2829.16	97.3801	2	2	0	0	0	0	2	5	Cathepsin B (A0A7I2V440_HUMAN)	CTSB		39.6758
62	A0A7I2V4P4	100	27.1	21.29	431.948	0.0191398	0.832981	0.581089	25.2895	5810.89	252895	431.948	18798.8	98.3806	5	6	0	0	0	0	11	13	Annexin (A0A7I2V4P4_HUMAN)	ANXA2		17.1698
63	A0A7I2V4V1	55	40	40	501.108	0.0212963	1.03263	0.691135	32.6019	6911.35	326019	501.108	23879.5	98.8863	2	3	0	0	0	0	2	3	Peptidyl-prolyl cis-trans isomerase (A0A7I2V4V1_HUMAN)	PPIA		6.42299
64	A0A7I2V4Y4	91.4333	1.97667	1.12	67.5478	0.00287826	0.0374479	0.0936785	1.24147	936.785	12414.7	67.5478	884.704	94.4456	2	3	0	0	0	0	5	7	Alpha-actinin-1 (A0A7I2V4Y4_HUMAN)	ACTN1		103.541
65	A0A7I2V5J5	100	45.7167	45.7167	1676.22	0.0714286	1.23961	2.32552	42.0515	23255.2	420515	1676.22	30262.2	98.8863	2	2	0	0	0	0	3	4	Peptidyl-prolyl cis-trans isomerase A (A0A7I2V5J5_HUMAN)	PPIA		3.85196
66	A0A7P0TBL1	100	45.76	0	1799.77	0.0769976	5.81292	2.56572	193.699	25657.2	1.93699e+06	1799.77	135873	95.1299	5	6	0	0	0	0	13	16	Actin, cytoplasmic 2 (A0A7P0TBL1_HUMAN)	ACTG1		6.28908
67	A5A3E0	79.63	2.33	1.21	31.847	0.00136247	0.0690192	0.0454005	2.29986	454.004	22998.6	31.847	1613.28	99.5283	4	7	0	0	0	0	12	14	POTE ankyrin domain family member F (POTEF_HUMAN)	POTEF		121.367
68	A6NL76	88.58	6.3	6.3	84.3958	0.00360892	0.163174	0.116776	5.20167	1167.76	52016.7	84.3958	3796.38	98.8863	2	4	0	0	0	0	4	6	Actin, alpha skeletal muscle (A6NL76_HUMAN)	ACTA1		28.147
69	A8MUN2	84.18	1.45	1.45	15.0655	0.000667557	0.0242752	0.0202672	0.737002	202.672	7370.02	15.0655	547.845	93.7984	1	2	0	0	2	1	1	2	Apolipoprotein B-100 (A8MUN2_HUMAN)	APOB		92.5604
70	A8MZG1	100	51.7767	48.94	355.53	0.0152187	0.783317	0.491696	25.9523	4916.96	259523	355.53	18529.6	98.8863	3	3	0	0	0	0	4	4	Thrombospondin-1 (Fragment) (A8MZG1_HUMAN)	THBS1		10.0462
71	B0AZS6	100	18.75	15.775	396.987	0.0166667	0.356362	0.562867	12.1627	5628.67	121627	396.987	8614.43	99.1392	3	4	0	0	0	0	5	7	14-3-3 protein zeta/delta (B0AZS6_HUMAN)	YWHAZ		19.0604
72	B0YJC4	92.11	35.1133	30.4733	428.423	0.018131	1.10138	0.594592	36.3684	5945.92	363684	428.423	26232.6	98.8863	20	26	0	0	0	0	39	49	Vimentin (B0YJC4_HUMAN)	VIM		49.6231
73	B1AHL2	59.27	3.23667	2.31333	51.6089	0.00220401	0.0901613	0.0707591	2.875	707.591	28750	51.6089	2090.91	96.396	3	3	1	1	1	1	4	4	Fibulin-1 (B1AHL2_HUMAN)	FBLN1		78.2769
74	B2RCP7	100	3.62667	2.48	145.777	0.00620821	0.0914659	0.201392	3.01612	2013.92	30161.2	145.777	2184.65	96.9414	2	2	0	0	2	1	3	4	cDNA, FLJ96197, highly similar to Homo sapiens connective tissue growth factor (CTGF), mRNA (B2RCP7_HUMAN)			37.9848
75	B2RDY9	85.68	3.79	3.79	58.3721	0.00229358	0.0435626	0.0812426	1.54307	812.426	15430.7	58.3721	1108.68	98.75	1	1	1	1	1	1	1	1	Adenylyl cyclase-associated protein (B2RDY9_HUMAN)			51.5826
76	B3KPL1	82.45	1.61	0	0	0	0.01787	0	0.632987	0	6329.87	0	454.795	91.092	1	1	1	1	1	1	0	15	cDNA FLJ31907 fis, clone NT2RP7004396, highly similar to Homo sapiens SH3 multiple domains 1 (SH3MD1), mRNA (B3KPL1_HUMAN)			115.776
77	B4DFW2	100	22.38	22.38	100.046	0.00437063	0.29155	0.137871	9.28328	1378.71	92832.8	100.046	6697.26	98.9544	2	2	0	0	2	2	2	2	Metalloproteinase inhibitor 2 (B4DFW2_HUMAN)	TIMP2		16.0707
78	B4DNK4	93.22	4.74	4.74	119.428	0.00508607	0.0587161	0.16499	1.97584	1649.9	19758.4	119.428	1422.34	97.0807	2	2	0	0	0	0	3	3	Pyruvate kinase (B4DNK4_HUMAN)	PKM		49.8659
79	B7Z5J4	74.45	1.575	1.575	45.3175	0.00200803	0.0373039	0.0609643	1.13256	609.643	11325.6	45.3175	841.878	94.2716	1	3	0	0	2	0	1	4	Carboxypeptidase A4 (B7Z5J4_HUMAN)	CPA4		35.6116
80	B7Z6Z4	88.66	8.40333	7.14333	86.5916	0.00361811	0.134606	0.119601	4.58394	1196.01	45839.4	86.5916	3298.34	96.2302	2	3	0	0	1	1	3	5	Myosin light polypeptide 6 (B7Z6Z4_HUMAN)	MYL6		26.69
81	B7ZKJ8	70.91	1.07	1.07	32.7124	0.00128535	0.0262093	0.0455293	0.928381	455.293	9283.81	32.7124	667.033	98.75	1	2	2	1	2	1	1	3	ITIH4 protein (B7ZKJ8_HUMAN)	ITIH4		103.816
82	B8ZZ54	100	25.53	25.53	480.172	0.0212766	0.389495	0.645963	11.8252	6459.63	118252	480.172	8790.17	98.3806	1	1	0	0	1	1	1	1	10 kDa heat shock protein, mitochondrial (B8ZZ54_HUMAN)	HSPE1		5.18669
83	C9J2C0	74.3	3	3	73.3436	0.00288184	0.0550081	0.10208	1.94849	1020.8	19484.9	73.3436	1399.97	98.75	1	1	0	0	0	0	1	1	Tubulin alpha chain (Fragment) (C9J2C0_HUMAN)	TUBA8		51.9516
84	C9J3P4	62.57	12.87	12.87	210.917	0.00934579	0.154782	0.283741	4.69922	2837.41	46992.2	210.917	3493.13	98.3806	1	1	0	0	0	0	1	1	Carboxypeptidase A4 (Fragment) (C9J3P4_HUMAN)	CPA4		19.5928
85	C9J4Y6	100	10.26	10.26	76.9524	0.00320513	0.154782	0.10542	5.09094	1054.2	50909.4	76.9524	3716.19	98.5653	1	2	0	0	2	1	2	2	Glypican-1 (Fragment) (C9J4Y6_HUMAN)	GPC1		18.0739
86	C9J5G4	100	22.3033	19.6667	621.785	0.0263789	0.361333	0.864953	11.8143	8649.53	118143	621.785	8514.24	98.8863	3	4	0	0	0	0	6	8	Follistatin-related protein 1 (Fragment) (C9J5G4_HUMAN)	FSTL1		15.7108
87	C9J813	94.12	1.74	0	50.9246	0.00217865	0.0221716	0.0725971	0.738804	725.971	7388.04	50.9246	518.247	92.3729	1	3	0	0	3	1	1	3	Caldesmon (Fragment) (C9J813_HUMAN)	CALD1		54.1265
88	C9J9W2	79.52	3.915	3.915	170.97	0.00757576	0.0526476	0.230002	1.59839	2300.02	15983.9	170.97	1188.16	95.712	1	2	1	0	2	1	2	4	LIM and SH3 domain protein 1 (Fragment) (C9J9W2_HUMAN)	LASP1		18.9683
89	C9JIZ6	81.4	2.53333	2.02667	51.3617	0.00217192	0.0677885	0.070766	2.19236	707.66	21923.6	51.3617	1591.59	95.4887	2	3	0	0	0	0	2	4	Prosaposin (C9JIZ6_HUMAN)	PSAP		58.402
90	C9JKR2	93.53	8.63	3.6	373.424	0.0159758	0.3815	0.532347	12.7124	5323.47	127124	373.424	8917.33	95.1299	8	14	0	0	0	0	42	55	Albumin (C9JKR2_HUMAN)	ALB		47.2567
91	C9JKZ2	100	18.85	14.1067	338.243	0.0140658	0.267852	0.470816	8.72198	4708.16	87219.8	338.243	6302.67	98.8863	4	7	0	0	0	0	8	12	Nucleobindin-1 (Fragment) (C9JKZ2_HUMAN)	NUCB1		31.0472
92	C9JN98	56.36	9.09	9.09	130.041	0.00546448	0.0857111	0.180517	2.83144	1805.17	28314.4	130.041	2039.72	98.8863	1	2	0	0	0	0	1	2	Glia-derived nexin (Fragment) (C9JN98_HUMAN)	SERPINE2		30.42
93	C9K028	50	20	20	2256.81	0.1	0.389495	3.03602	11.8252	30360.2	118252	2256.81	8790.17	98.3806	1	1	0	0	0	0	3	3	Nucleoside diphosphate kinase A (Fragment) (C9K028_HUMAN)	NME1		6.52241
94	D3DTX7	76.08	28.6233	22.9	292.499	0.012306	1.07985	0.406307	35.5306	4063.07	355306	292.499	25686.1	98.8863	25	32	3	3	3	3	77	95	Collagen, type I, alpha 1, isoform CRA_a (D3DTX7_HUMAN)	COL1A1		84.6883
95	D6R956	85.06	7.47	7.47	195.475	0.00813008	0.100694	0.272924	3.3264	2729.24	33264	195.475	2396.28	98.8863	1	3	0	0	3	1	3	4	Ubiquitin carboxyl-terminal hydrolase (D6R956_HUMAN)	UCHL1		26.8225
96	D6RBE9	100	8.18333	4.85	233.439	0.00984849	0.153655	0.323316	4.99881	3233.16	49988.1	233.439	3603.21	94.3767	2	5	0	0	2	1	3	8	Annexin (D6RBE9_HUMAN)	ANXA5		24.6824
97	D6RBJ7	83.91	6.32	6.32	33.5839	0.00143678	0.0592537	0.0478765	1.97446	478.765	19744.6	33.5839	1385.02	99.5283	1	1	0	0	0	0	1	1	Gc-globulin (D6RBJ7_HUMAN)	GC		38.7719
98	D6RBL5	100	9.62	9.62	326.285	0.0128205	0.154782	0.454125	5.48265	4541.25	54826.5	326.285	3939.24	98.75	2	3	0	0	0	0	4	7	Annexin (D6RBL5_HUMAN)	ANXA5		29.319
99	D6RBX4	100	20	20	1041.6	0.0461538	0.29155	1.40124	8.85152	14012.4	88515.2	1041.6	6579.72	93.7337	1	1	0	0	1	1	3	3	Transforming growth factor-beta-induced protein ig-h3 (D6RBX4_HUMAN)	TGFBI		7.26784
100	D6RF35	88.24	8.89	7.7	137.863	0.00577731	0.129452	0.189981	4.23064	1899.81	42306.4	137.863	3067.88	96.2302	3	4	2	2	3	3	5	6	Gc-globulin (D6RF35_HUMAN)	GC		52.9859
101	D6RGG3	70.2733	2.81	2.30667	27.1326	0.00112846	0.0579788	0.0372559	1.89357	372.559	18935.7	27.1326	1382.04	98.8863	7	16	16	7	16	7	10	22	Collagen alpha-1(XII) chain (D6RGG3_HUMAN)	COL12A1		332.996
102	D6RHD5	94.12	2.4	2.4	256.745	0.010984	0.152228	0.36601	5.07256	3660.1	50725.6	256.745	3558.24	99.5283	4	5	0	0	0	0	15	22	Albumin (D6RHD5_HUMAN)	ALB		52.0251
103	E5RFF0	100	10.26	10.26	149.836	0.00641026	0.110336	0.213603	3.67664	2136.03	36766.4	149.836	2579.04	99.5283	1	1	0	0	0	0	1	1	Annexin A6 (Fragment) (E5RFF0_HUMAN)	ANXA6		17.5359
104	E5RFN6	61.4867	1.21	0.806667	68.4426	0.00293914	0.0295345	0.0950799	0.973949	950.799	9739.49	68.4426	705.376	93.9842	2	3	3	2	3	2	4	11	ATP-binding cassette sub-family A member 10 (E5RFN6_HUMAN)	ABCA10		150.767
105	E5RFY0	54.65	3.1	3.1	151.489	0.00595238	0.100694	0.210844	3.56677	2108.44	35667.7	151.489	2562.69	91.3545	1	1	0	0	0	0	2	2	Lysyl oxidase homolog 2 (Fragment) (E5RFY0_HUMAN)	LOXL2		27.7584
106	E5RGE1	100	43.14	28.76	1240.72	0.051634	0.778279	1.72435	25.7102	17243.5	257102	1240.72	18521.2	96.2356	2	3	0	0	0	0	4	7	14-3-3 protein zeta/delta (Fragment) (E5RGE1_HUMAN)	YWHAZ		5.75979
107	E5RK62	100	56.52	46.085	1481.18	0.061245	1.63665	2.09099	56.2548	20909.9	562548	1481.18	39954.4	95.8036	8	10	0	0	0	0	31	43	Osteonectin (Fragment) (E5RK62_HUMAN)	SPARC		13.3706
108	E5RK69	93.26	4.78333	4.13333	42.2684	0.00174825	0.0624132	0.0591197	2.06921	591.197	20692.1	42.2684	1474.37	97.3801	2	4	0	0	3	1	2	5	Annexin (E5RK69_HUMAN)	ANXA6		51.7442
109	E5RK99	40.71	7.08	0	307.558	0.0131579	0.258925	0.438448	8.62793	4384.48	86279.3	307.558	6052.22	92.2006	1	2	0	0	2	1	1	3	Collagen triple helix repeat-containing protein 1 (E5RK99_HUMAN)	CTHRC1		12.294
110	E7EQB2	89.655	2.155	1.51	77.6866	0.00335249	0.0719197	0.10923	2.26799	1092.3	22679.9	77.6866	1646.09	95.088	3	3	1	1	3	3	4	6	Lactotransferrin (Fragment) (E7EQB2_HUMAN)	LTF		76.5769
111	E7ERL0	78.42	18.71	18.71	362.332	0.016055	0.389495	0.487435	11.8252	4874.35	118252	362.332	8790.17	98.3806	2	2	0	0	0	0	4	4	Nucleoside diphosphate kinase A (E7ERL0_HUMAN)	NME1		15.2509
112	E7ESK7	100	17.52	17.52	494.192	0.0218978	0.221677	0.664823	6.73018	6648.23	67301.8	494.192	5002.83	94.4751	2	2	0	0	0	0	4	4	14-3-3 protein zeta/delta (Fragment) (E7ESK7_HUMAN)	YWHAZ		15.6869
113	E7ETU9	79.52	1.99	1.99	36.6365	0.00162338	0.0281304	0.0492861	0.854045	492.861	8540.45	36.6365	634.849	98.3806	1	2	0	0	1	1	1	2	Procollagen-lysine 5-dioxygenase (E7ETU9_HUMAN)	PLOD2		81.1187
114	E7EUT5	85.38	33.46	24.7433	571.511	0.0239967	1.04182	0.793627	34.1475	7936.27	341475	571.511	24606.7	98.8863	9	10	0	0	0	0	16	19	Glyceraldehyde-3-phosphate dehydrogenase (E7EUT5_HUMAN)	GAPDH		27.8531
115	E7EX29	100	13.41	8.94	107.03	0.00474255	0.232847	0.143985	7.06928	1439.85	70692.8	107.03	5254.91	98.3806	3	3	0	0	0	0	2	4	14-3-3 protein zeta/delta (Fragment) (E7EX29_HUMAN)	YWHAZ		28.019
116	E9PF17	71.455	2.01	1.25	23.0334	0.000999201	0.0355034	0.0321117	1.13047	321.117	11304.7	23.0334	815.556	98.9544	2	6	4	1	6	2	2	6	Versican core protein (E9PF17_HUMAN)	VCAN		176.719
117	E9PHT9	100	26.99	26.07	464.1	0.019683	0.444393	0.632515	14.4254	6325.15	144254	464.1	10560.7	98.5653	4	5	0	0	0	0	5	9	Annexin (E9PHT9_HUMAN)	ANXA5		18.2125
118	E9PHW4	70.09	4.11	2.055	46.0864	0.0019975	0.0722672	0.0643424	2.30107	643.424	23010.7	46.0864	1660.07	95.9645	1	2	0	0	1	1	2	3	Fibrillin-2 (E9PHW4_HUMAN)	FBN2		36.771
119	E9PHY3	58.47	6.56	6.56	94.9636	0.00373134	0.178769	0.132171	6.3323	1321.71	63323	94.9636	4549.7	98.75	1	1	0	0	1	1	1	1	Dickkopf-related protein 3 (Fragment) (E9PHY3_HUMAN)	DKK3		20.0233
120	E9PJ32	100	43.405	38.46	1029.56	0.0425824	0.563178	1.45355	19.2126	14535.5	192126	1029.56	13605.2	99.1392	3	4	0	0	0	0	5	8	Transgelin (Fragment) (E9PJ32_HUMAN)	TAGLN		10.3423
121	E9PK25	100	14.46	14.46	208.088	0.00898693	0.111012	0.292204	3.59213	2922.04	35921.3	208.088	2565.71	98.9544	2	3	0	0	2	1	4	5	Cofilin, non-muscle isoform (E9PK25_HUMAN)	CFL1		22.7138
122	E9PKE3	80.38	2.55	2.55	45.6097	0.00179211	0.0288349	0.0634799	1.02138	634.799	10213.8	45.6097	733.854	98.75	1	1	0	0	1	1	1	1	Heat shock cognate 71 kDa protein (E9PKE3_HUMAN)	HSPA8		68.7632
123	F5GXS2	88.47	4.13333	3.69667	48.8084	0.00205042	0.0702484	0.0667019	2.24863	667.019	22486.3	48.8084	1651.35	95.7998	3	5	0	0	0	0	6	7	Actinin, alpha 4, isoform CRA_a (F5GXS2_HUMAN)	ACTN4		104.789
124	F5GXY0	52.78	8.33	8.33	1068.16	0.0444444	0.178769	1.48337	5.90557	14833.7	59055.7	1068.16	4254.26	98.8863	1	1	0	0	1	1	5	7	Pregnancy zone protein (F5GXY0_HUMAN)	PZP		16.0035
125	F5H4E2	16.22	26.13	26.13	1419.1	0.0591017	1.03263	1.97702	35.4608	19770.2	354608	1419.1	25507.4	98.8863	2	2	0	0	0	0	4	4	SPARC (Fragment) (F5H4E2_HUMAN)	SPARC		12.0926
126	F5H6I0	100	9.9	6.6	744.1	0.0313531	0.249011	1.03133	8.03814	10313.3	80381.4	744.1	5839.49	96.2356	2	2	0	0	0	0	4	4	Beta-2-microglobulin (F5H6I0_HUMAN)	B2M		11.725
127	F8VUF6	100	10.8633	5.99333	257.299	0.0106742	0.178303	0.361562	6.07545	3615.62	60754.5	257.299	4371.45	92.5513	2	6	0	0	2	1	3	8	Decorin (Fragment) (F8VUF6_HUMAN)	DCN		20.0756
128	F8W026	100	29.17	29.17	265.107	0.0104167	0.930698	0.368977	32.967	3689.77	329670	265.107	23686.5	98.75	2	2	0	0	2	2	2	3	Endoplasmin (Fragment) (F8W026_HUMAN)	HSP90B1		5.47792
129	F8W696	100	6.53	6.53	121.025	0.00510204	0.101257	0.165229	3.24135	1652.29	32413.5	121.025	2380.36	96.9671	2	2	2	2	2	2	2	2	Apolipoprotein A-I (F8W696_HUMAN)	APOA1		27.8913
130	G3XAL0	80.09	10.39	0	105.29	0.0045045	0.202264	0.150099	6.73987	1500.99	67398.7	105.29	4727.81	95.1299	2	3	0	0	0	0	3	5	Malate dehydrogenase (G3XAL0_HUMAN)	MDH2		24.5788
131	H0Y2P0	52.96	4.18	4.18	126.216	0.00549451	0.105295	0.174951	3.35272	1749.51	33527.2	126.216	2418.76	98.9544	1	1	0	0	1	1	1	1	CD44 antigen (Fragment) (H0Y2P0_HUMAN)	CD44		30.9329
132	H0Y3Z3	91.87	5.58333	4.78667	37.5401	0.00154321	0.07754	0.0522873	2.63853	522.873	26385.3	37.5401	1898.58	98.8863	2	4	0	0	0	0	2	4	Protein disulfide-isomerase (H0Y3Z3_HUMAN)	P4HB		47.4097
133	H0Y789	100	45.0467	43.23	892.32	0.0378208	4.80324	1.23486	156.866	12348.6	1.56866e+06	892.32	113617	95.908	12	18	0	0	0	0	30	38	Metalloproteinase inhibitor 1 (Fragment) (H0Y789_HUMAN)	TIMP1		17.6427
134	H0Y7Z1	65	6.22667	6.22667	100.419	0.00419682	0.116164	0.139612	3.80689	1396.12	38068.9	100.419	2755.96	98.8863	4	6	0	0	0	0	10	12	Fibronectin (Fragment) (H0Y7Z1_HUMAN)	FN1		120.699
135	H0Y875	80.27	24.49	24.49	457.724	0.0192744	0.274275	0.637375	9.06059	6373.75	90605.9	457.724	6527.08	98.8863	2	2	0	0	0	0	5	5	Calumenin (Fragment) (H0Y875_HUMAN)	CALU		17.359
136	H0Y8L3	81.69	6.28	3.01	58.6314	0.00250836	0.118872	0.0835838	3.96107	835.838	39610.7	58.6314	2778.56	99.5283	2	2	0	0	2	2	2	4	Transforming growth factor-beta-induced protein ig-h3 (Fragment) (H0Y8L3_HUMAN)	TGFBI		39.879
137	H0YAP6	100	34.33	34.33	284.891	0.011194	0.389495	0.396512	13.7966	3965.12	137966	284.891	9912.75	98.75	2	2	0	0	0	0	2	2	Lysyl oxidase homolog 2 (Fragment) (H0YAP6_HUMAN)	LOXL2		7.93997
138	H0YCU9	100	47.24	22.9567	627.147	0.0264927	1.07928	0.867681	35.2281	8676.81	352281	627.147	25444.9	95.8105	6	7	0	0	3	3	9	14	Transgelin (Fragment) (H0YCU9_HUMAN)	TAGLN		16.8325
139	H0YFX9	68.48	20.65	20.65	245.305	0.0108696	0.178769	0.330003	5.42746	3300.03	54274.6	245.305	4034.47	98.3806	1	1	1	1	1	1	1	1	Histone H2A (Fragment) (H0YFX9_HUMAN)	H2AJ		9.96958
140	H0YKS4	100	26.705	13.635	601.432	0.0247633	0.571072	0.848029	19.5463	8480.29	195463	601.432	13859.6	99.1392	5	6	0	0	0	0	9	13	Annexin (Fragment) (H0YKS4_HUMAN)	ANXA2		19.5181
141	H0YL33	100	34.9833	31.83	481.215	0.0199588	0.503424	0.671775	16.8331	6717.75	168331	481.215	12186.5	96.893	7	9	0	0	0	0	17	21	Annexin (H0YL33_HUMAN)	ANXA2		25.8552
142	H3BMQ8	100	18.93	18.93	68.1268	0.00297619	0.190472	0.0938839	5.96347	938.839	59634.7	68.1268	4347.78	98.9544	2	3	0	0	0	0	2	3	Fructose-bisphosphate aldolase (Fragment) (H3BMQ8_HUMAN)	ALDOA		15.453
143	H3BPA5	100	3.38	3.38	214.77	0.00843882	0.0797752	0.298918	2.82578	2989.18	28257.8	214.77	2030.3	90.1408	1	1	1	1	1	1	2	5	Ras-related protein Rab-40C (Fragment) (H3BPA5_HUMAN)	RAB40C		26.4874
144	H3BPS8	74.82	8.63	8.63	97.7499	0.00425532	0.0797752	0.135494	2.54013	1354.94	25401.3	97.7499	1832.53	98.9544	1	1	0	0	0	0	1	1	Fructose-bisphosphate aldolase (Fragment) (H3BPS8_HUMAN)	ALDOA		30.4076
145	H3BQ34	88.97	8.19	8.19	191.147	0.008	0.0680004	0.270776	2.33731	2707.76	23373.1	191.147	1660.05	99.1392	1	2	0	0	0	0	2	3	Pyruvate kinase (H3BQ34_HUMAN)	PKM		30.7009
146	H3BQN4	76.45	4.16	4.16	31.2577	0.00138504	0.0563541	0.0420502	1.71092	420.502	17109.2	31.2577	1271.8	98.3806	1	1	0	0	0	0	1	1	Fructose-bisphosphate aldolase (H3BQN4_HUMAN)	ALDOA		39.3154
147	H3BR68	76.92	31.54	31.54	352.988	0.015641	1.03092	0.474865	31.2989	4748.65	312989	352.988	23265.8	94.0217	4	4	0	0	0	0	4	5	Fructose-bisphosphate aldolase (Fragment) (H3BR68_HUMAN)	ALDOA		13.769
148	H3BT58	100	10.96	0	160.099	0.00684931	0.178769	0.228233	5.95694	2282.33	59569.4	160.099	4178.61	92.3513	1	2	0	0	2	1	1	4	Coactosin-like protein (H3BT58_HUMAN)	COTL1		8.2193
149	H6VRG1	67.8067	36.64	30.6433	354.555	0.0147934	1.44155	0.491139	47.4026	4911.39	474026	354.555	34307.8	98.8863	26	30	8	7	26	23	50	75	Cytokeratin-1 (H6VRG1_HUMAN)	KRT1		66.086
150	H7BZ94	92.67	4.38333	4.38333	30.5275	0.00129199	0.0555308	0.042829	1.83855	428.29	18385.5	30.5275	1315.44	98.8863	2	2	0	0	0	0	2	2	Protein disulfide-isomerase (H7BZ94_HUMAN)	P4HB		52.4693
151	H7BZJ3	100	11.38	11.38	378.677	0.0162602	0.178769	0.514238	5.87988	5142.38	58798.8	378.677	4292.09	98.5653	1	2	0	0	0	0	2	3	Protein disulfide-isomerase A3 (Fragment) (H7BZJ3_HUMAN)	PDIA3		13.5108
152	H7C013	100	6.09	6.09	435.056	0.0186125	0.304321	0.620208	10.1406	6202.08	101406	435.056	7113.32	99.5283	3	8	0	0	0	0	7	16	Albumin (Fragment) (H7C013_HUMAN)	ALB		22.844
153	I3L0S0	80.26	10.09	7.94	209.215	0.00895062	0.133824	0.298253	4.45928	2982.53	44592.8	209.215	3128.04	92.8571	3	3	0	0	0	0	6	7	Protein disulfide-isomerase (I3L0S0_HUMAN)	P4HB		52.5162
154	I3L107	100	13.13	13.13	116.016	0.00505051	0.165914	0.160814	5.28291	1608.14	52829.1	116.016	3811.26	98.9544	1	1	0	0	0	0	1	1	Pigment epithelium-derived factor (Fragment) (I3L107_HUMAN)	SERPINF1		11.212
155	I3L1U9	72.43	12.62	4.67	460.918	0.0193564	0.942315	0.629956	30.4569	6299.56	304569	460.918	22318.5	98.5653	6	7	0	0	0	0	11	15	Actin, cytoplasmic 2 (Fragment) (I3L1U9_HUMAN)	ACTG1		23.83
156	I3L3D5	75.76	26.67	21.4167	1202.35	0.050473	0.620559	1.6733	20.6153	16733	206153	1202.35	14878.3	98.8863	5	6	0	0	0	0	13	15	Profilin (Fragment) (I3L3D5_HUMAN)	PFN1		17.5059
157	J3KMX3	87.0267	2.89	1.92667	135.63	0.00575758	0.0784174	0.189014	2.5905	1890.14	25905	135.63	1866.14	96.1183	2	5	5	2	5	2	5	9	Alpha-fetoprotein (J3KMX3_HUMAN)	AFP		70.4038
158	J3KRE2	75.19	13.18	13.18	118.408	0.00515464	0.145048	0.16413	4.61848	1641.3	46184.8	118.408	3331.92	98.9544	1	1	0	0	1	1	1	1	Rho GDP-dissociation inhibitor 1 (J3KRE2_HUMAN)	ARHGDIA		14.8052
159	J3KS17	100	8.65	8.65	217.001	0.00961539	0.258925	0.291925	7.86104	2919.25	78610.4	217.001	5843.45	93.6869	1	2	2	1	2	1	1	3	Beta-2-glycoprotein 1 (Fragment) (J3KS17_HUMAN)	APOH		11.6543
160	K7EJ44	100	49.36	34.9367	849.507	0.0351801	1.29641	1.17341	42.4309	11734.1	424309	849.507	30733.4	97.4201	5	7	0	0	0	0	10	16	Profilin (K7EJ44_HUMAN)	PFN1		11.3828
161	K7EJB9	81.38	23.0167	22.1567	324.129	0.0135284	0.325585	0.450186	10.6805	4501.86	106805	324.129	7726.99	96.4437	5	10	0	0	0	0	16	19	Calreticulin (K7EJB9_HUMAN)	CALR		40.5103
162	K7EL50	74.6	32.2733	29.01	535.125	0.0223638	0.804722	0.742427	26.5837	7424.27	265837	535.125	19150.4	98.8863	10	13	0	0	0	0	27	31	Calreticulin (K7EL50_HUMAN)	CALR		43.33
163	K7EMR1	59.88	9.3	9.3	192.805	0.00757576	0.193777	0.268347	6.86391	2683.47	68639.1	192.805	4931.66	98.75	1	1	1	1	1	1	1	1	Progranulin (Fragment) (K7EMR1_HUMAN)	GRN		18.0572
164	M0QXF7	100	17.86	17.86	477.053	0.0198413	0.258925	0.666063	8.55352	6660.63	85535.2	477.053	6161.8	98.8863	1	3	3	1	3	1	2	4	Myeloid-derived growth factor (Fragment) (M0QXF7_HUMAN)	MYDGF		9.66357
165	M0R081	87.07	3.79	0	84.6898	0.00362319	0.0624678	0.120732	2.08156	1207.32	20815.6	84.6898	1460.15	91.3514	1	2	2	1	2	1	1	2	C-type lectin domain family 11 member A (M0R081_HUMAN)	CLEC11A		33.5133
166	O00391	90.76	2.68	2.68	33.0614	0.00141443	0.0281304	0.0471317	0.937363	471.317	9373.63	33.0614	657.53	99.5283	1	2	2	1	2	1	1	2	Sulfhydryl oxidase 1 (QSOX1_HUMAN)	QSOX1		82.5255
167	O00622	91.86	4.855	4.855	59.1069	0.00261905	0.0740768	0.0795149	2.24899	795.149	22489.9	59.1069	1671.77	96.0371	2	3	3	2	3	2	3	3	CCN family member 1 (CCN1_HUMAN)	CCN1		41.9983
168	O43707	88.47	4.61	3.73	29.0278	0.00124186	0.0686762	0.0413815	2.28843	413.815	22884.3	29.0278	1605.26	99.5283	3	7	0	0	0	0	6	9	Alpha-actinin-4 (ACTN4_HUMAN)	ACTN4		104.788
169	O43852	90.79	8.99667	8.99667	226.398	0.00952381	0.115884	0.316639	3.82819	3166.39	38281.9	226.398	2757.76	98.8863	2	5	0	0	0	0	5	9	Calumenin (CALU_HUMAN)	CALU		37.0835
170	O60814	100	7.935	3.57	271.867	0.0119048	0.0857111	0.373185	2.72914	3731.85	27291.4	271.867	1968.89	93.7461	1	2	1	1	2	1	2	4	Histone H2B type 1-K (H2B1K_HUMAN)	H2BC12		13.8816
171	O94985	52.8	2.75	2.75	66.0473	0.00259516	0.0550081	0.091925	1.94849	919.25	19484.9	66.0473	1399.97	93.5583	2	4	0	0	0	0	2	5	Calsyntenin-1 (CSTN1_HUMAN)	CLSTN1		109.724
172	O95497	61.01	3.7	3.7	33.091	0.00146628	0.0680004	0.0445165	2.06451	445.165	20645.1	33.091	1534.64	98.3806	1	1	0	0	1	1	1	1	Pantetheinase (VNN1_HUMAN)	VNN1		56.9751
173	P00338	89.46	6.775	4.97	121.67	0.00533109	0.123878	0.166839	3.84872	1668.39	38487.2	121.67	2819.58	93.3375	2	4	0	0	4	2	3	6	L-lactate dehydrogenase A chain (LDHA_HUMAN)	LDHA		36.6654
174	P00558	100	7.03333	7.03333	93.5977	0.00386358	0.0768257	0.129782	2.53338	1297.82	25333.8	93.5977	1834.94	98.8863	2	3	1	1	3	2	2	3	Phosphoglycerate kinase 1 (PGK1_HUMAN)	PGK1		44.5861
175	P01023	73.13	5.36333	3.39333	196.241	0.0082158	0.1789	0.2717	5.88848	2717	58884.8	196.241	4251.48	97.5544	9	13	5	4	5	4	32	45	Alpha-2-macroglobulin (A2MG_HUMAN)	A2M	GO:0008150, GO:0007165, GO:0005576, GO:0043226, GO:0005575, GO:0006810, GO:0003674, GO:0005622, GO:0006950, GO:0002376, GO:0005615, GO:0016192, GO:0005737, GO:0030198, GO:0030154, GO:0005829, GO:0031410, GO:0031012, GO:0030234, GO:0019899	163.188
176	P01024	91.78	1.86	1.64	34.7469	0.00146382	0.0246653	0.048417	0.814809	484.17	8148.09	34.7469	586.973	98.8863	2	4	0	0	4	2	4	5	Complement C3 (CO3_HUMAN)	C3		187.03
177	P01033	100	14.8167	12.8833	758.439	0.0323518	0.649355	1.05103	21.4698	10510.3	214698	758.439	15425.8	98.8863	5	6	0	0	0	0	19	22	Metalloproteinase inhibitor 1 (TIMP1_HUMAN)	TIMP1		23.1555
178	P01034	80.82	32.1933	25.8	323.011	0.0136986	0.550576	0.447879	17.8114	4478.79	178114	323.011	12891	98.8863	3	3	3	3	3	3	4	4	Cystatin-C (CYTC_HUMAN)	CST3		15.7891
179	P02452	71.7467	24.6833	19.7633	213.984	0.0090099	0.674279	0.297049	22.1228	2970.49	221228	213.984	15987.7	98.8863	27	33	22	18	23	19	84	100	Collagen alpha-1(I) chain (CO1A1_HUMAN)	COL1A1		138.857
180	P02458	74.845	3.395	2.15	29.1304	0.00119597	0.0533104	0.0400674	1.75343	400.674	17534.3	29.1304	1279.94	96.3059	3	6	4	1	4	1	6	12	Collagen alpha-1(II) chain (CO2A1_HUMAN)	COL2A1		141.699
181	P02461	67.55	7.04667	5.29667	105.165	0.00440849	0.225	0.145769	7.34055	1457.69	73405.5	105.165	5316.48	98.8863	10	15	15	10	15	10	20	24	Collagen alpha-1(III) chain (CO3A1_HUMAN)	COL3A1		138.479
182	P02462	69.9033	2.22	2.22	40.4542	0.00168724	0.0355034	0.0565435	1.17284	565.435	11728.4	40.4542	844.894	97.4279	2	4	3	2	3	2	4	5	Collagen alpha-1(IV) chain (CO4A1_HUMAN)	COL4A1	GO:0008150, GO:0007165, GO:0034330, GO:0005198, GO:0048856, GO:0048646, GO:0005783, GO:0005576, GO:0043226, GO:0005575, GO:0003674, GO:0005622, GO:0005615, GO:0005737, GO:0030198, GO:0030154, GO:0032991, GO:0031012	160.51
183	P02751	59.32	4.16	3.54	104.095	0.00439697	0.121547	0.145216	3.96709	1452.16	39670.9	104.095	2865.16	98.8863	9	12	0	0	0	0	21	26	Fibronectin (FINC_HUMAN)	FN1		272.15
184	P02765	60.8567	3.54	3.54	724.824	0.0303321	0.373824	1.00595	12.3492	10059.5	123492	724.824	8896.1	98.8863	4	4	4	4	4	4	17	18	Alpha-2-HS-glycoprotein (FETUA_HUMAN)	AHSG		39.3157
185	P02795	100	18.03	13.66	919.32	0.0382514	0.417067	1.27667	13.442	12766.7	134420	919.32	9770.85	96.9414	2	2	0	0	1	1	3	4	Metallothionein-2 (MT2_HUMAN)	MT2A		6.0372
186	P04083	100	5.78	5.78	57.5198	0.00240848	0.0635784	0.0794249	2.0563	794.249	20563	57.5198	1492.79	98.8863	2	2	0	0	0	0	2	3	Annexin A1 (ANXA1_HUMAN)	ANXA1		38.69
187	P04406	80.3	13.585	11.045	235.153	0.0102573	0.251539	0.324878	7.95003	3248.78	79500.3	235.153	5762.02	98.9544	4	5	0	0	0	0	6	7	Glyceraldehyde-3-phosphate dehydrogenase (G3P_HUMAN)	GAPDH		36.0304
188	P05067	74.55	2.99	2.99	40.552	0.00166113	0.0307608	0.0570962	1.05731	570.962	10573.1	40.552	750.942	99.1392	1	1	0	0	0	0	1	1	Amyloid-beta precursor protein (A4_HUMAN)	APP		86.8881
189	P05121	72.39	38.89	31.6767	403.426	0.0171291	1.07114	0.55771	35.127	5577.1	351270	403.426	25395.2	98.8863	12	15	14	11	15	12	20	24	Plasminogen activator inhibitor 1 (PAI1_HUMAN)	SERPINE1		45.031
190	P07093	70.1	9.88	8.87667	212.043	0.00881288	0.208857	0.293177	7.00529	2931.77	70052.9	212.043	5056.91	98.8863	4	6	0	0	0	0	5	7	Glia-derived nexin (GDN_HUMAN)	SERPINE2		43.9742
191	P07585-4	83.72	0	0	0	0	0	0	0	0	0	0	0	93.0435	0	2	0	0	0	0	1	3	Isoform D of Decorin (PGS2_HUMAN)	DCN		19.2307
192	P07900	81.97	1.5	1.5	17.9969	0.000797448	0.0213493	0.0242107	0.648171	242.107	6481.71	17.9969	481.814	98.3806	1	1	0	0	0	0	1	1	Heat shock protein HSP 90-alpha (HS90A_HUMAN)	HSP90AA1		84.6067
193	P07996	77.69	7.06667	4.84333	75.3741	0.0032095	0.156944	0.104429	5.10353	1044.29	51035.3	75.3741	3688.92	97.4201	7	11	0	0	0	0	13	19	Thrombospondin-1 (TSP1_HUMAN)	THBS1		129.3
194	P08253	74.39	11.97	8.99	196.585	0.00821581	0.198536	0.272931	6.55088	2729.31	65508.8	196.585	4735.99	98.8863	6	10	10	6	10	6	11	15	72 kDa type IV collagenase (MMP2_HUMAN)	MMP2		73.8347
195	P08572	73.19	1.285	0.44	41.7502	0.00179856	0.0230124	0.0588664	0.744215	588.664	7442.15	41.7502	531.746	92.6549	2	5	3	1	3	1	4	8	Collagen alpha-2(IV) chain (CO4A2_HUMAN)	COL4A2		167.449
196	P09211	80	18.1	18.1	201.501	0.00892857	0.274275	0.271074	8.32706	2710.74	83270.6	201.501	6189.86	98.3806	2	2	0	0	2	2	2	2	Glutathione S-transferase P (GSTP1_HUMAN)	GSTP1		23.341
197	P09341	100	26.4767	23.05	432.184	0.0186916	0.490996	0.596895	15.9363	5968.95	159363	432.184	11438.7	98.8863	3	4	4	3	4	3	4	6	Growth-regulated alpha protein (GROA_HUMAN)	CXCL1		11.2942
198	P09382	93.58	84.6933	62.9633	1204.68	0.0511836	4.55997	1.6672	150.546	16672	1.50546e+06	1204.68	108651	98.8863	10	13	13	10	13	10	23	28	Galectin-1 (LEG1_HUMAN)	LGALS1		14.7062
199	P09486	58.09	35.31	33.33	885.885	0.0375428	3.13135	1.22636	102.803	12263.6	1.02803e+06	885.885	74329.2	98.8863	19	24	0	0	0	0	57	79	SPARC (SPRC_HUMAN)	SPARC		34.6097
200	P0CG39	77.455	6.65	6.65	102.282	0.00430008	0.181778	0.13975	5.95257	1397.5	59525.7	102.282	4349.37	98.5653	10	12	1	1	1	1	19	28	POTE ankyrin domain family member J (POTEJ_HUMAN)	POTEJ	GO:0008150, GO:0005615, GO:0042592, GO:0005576, GO:0043226, GO:0005575, GO:0003674	117.315
201	P10599	100	46.9833	33.65	707.239	0.0301058	1.59745	0.977578	52.609	9775.78	526090	707.239	38254.5	97.4201	5	7	7	5	7	5	7	12	Thioredoxin (THIO_HUMAN)	TXN		11.7297
202	P11021	85.93	16.5667	13.4567	151.111	0.00639134	0.236105	0.209326	7.76702	2093.26	77670.2	151.111	5609.7	98.8863	8	14	14	8	14	8	13	22	Endoplasmic reticulum chaperone BiP (BIP_HUMAN)	HSPA5		72.2884
203	P11279	66.91	2.16	0	0	0	0.0660505	0	2.00531	0	20053.1	0	1490.63	93.7028	1	3	0	0	3	1	0	4	Lysosome-associated membrane glycoprotein 1 (LAMP1_HUMAN)	LAMP1		44.8538
204	P13639	83.57	0	0	0	0	0	0	0	0	0	0	0	93.5484	0	2	0	0	2	0	2	2	Elongation factor 2 (EF2_HUMAN)	EEF2		95.2769
205	P15259	89.33	5.53	2.765	197.085	0.00790514	0.0660505	0.275864	2.27028	2758.64	22702.8	197.085	1612.45	96.2218	1	2	0	0	1	1	3	3	Phosphoglycerate mutase 2 (PGAM2_HUMAN)	PGAM2		28.7478
206	P15531	100	28.29	28.29	369.069	0.0157895	0.539927	0.526138	17.9915	5261.38	179915	369.069	12620.4	99.5283	3	3	1	1	1	1	6	6	Nucleoside diphosphate kinase A (NDKA_HUMAN)	NME1		17.1377
207	P16035	83.18	29.09	29.09	324.502	0.0127505	0.29155	0.451644	10.3272	4516.44	103272	324.502	7420.01	98.75	3	6	6	3	6	3	4	8	Metalloproteinase inhibitor 2 (TIMP2_HUMAN)	TIMP2		24.3831
208	P18206	87.04	0	0	0	0	0	0	0	0	0	0	0	93.9891	0	5	5	0	5	0	0	5	Vinculin (VINC_HUMAN)	VCL		123.722
209	P18669	89.37	14.37	14.37	192.751	0.00803806	0.197104	0.263965	6.16702	2639.65	61670.2	192.751	4552.41	98.5653	3	4	0	0	2	2	3	5	Phosphoglycerate mutase 1 (PGAM1_HUMAN)	PGAM1		28.7858
210	P19022	52.6833	2.13333	2.13333	115.401	0.00473729	0.0548661	0.160731	1.80927	1607.31	18092.7	115.401	1310.41	97.3642	2	4	3	1	3	1	4	6	Cadherin-2 (CADH2_HUMAN)	CDH2		99.7473
211	P19823	74.74	5.63667	3.73667	145.237	0.00616024	0.0974988	0.200448	3.22084	2004.48	32208.4	145.237	2320.23	98.8863	4	6	0	0	0	0	8	11	Inter-alpha-trypsin inhibitor heavy chain H2 (ITIH2_HUMAN)	ITIH2		106.397
212	P20908	68.1367	2.50333	2.19667	48.8981	0.00205563	0.0555774	0.0681716	1.79262	681.716	17926.2	48.8981	1305.49	98.8863	4	9	9	4	9	4	7	15	Collagen alpha-1(V) chain (CO5A1_HUMAN)	COL5A1		183.447
213	P21333	72.8133	2.40333	1.55	23.0258	0.000981164	0.0393387	0.0318815	1.24593	318.815	12459.3	23.0258	911.518	97.2503	4	12	0	0	7	4	6	13	Filamin-A (FLNA_HUMAN)	FLNA		280.564
214	P21810	82.88	4.48	1.9	90.6127	0.00393082	0.0883199	0.126326	2.85745	1263.26	28574.5	90.6127	2041.13	96.0371	2	3	0	0	2	1	2	4	Biglycan (PGS1_HUMAN)	BGN		41.6275
215	P22392	100	31.36	31.36	472.893	0.0198465	0.562001	0.654577	18.5478	6545.77	185478	472.893	13400.4	97.3373	4	6	2	1	4	2	9	11	Nucleoside diphosphate kinase B (NDKB_HUMAN)	NME2		17.2869
216	P22692	74.03	18.22	13.4367	344.998	0.0143979	0.306583	0.482702	10.3077	4827.02	103077	344.998	7378.61	98.8863	4	6	6	4	6	4	6	8	Insulin-like growth factor-binding protein 4 (IBP4_HUMAN)	IGFBP4		27.9155
217	P23142	58.3667	3.31667	2.94	146.375	0.00624062	0.113941	0.205138	3.72843	2051.38	37284.3	146.375	2686.89	98.8863	3	5	1	1	1	1	6	8	Fibulin-1 (FBLN1_HUMAN)	FBLN1		77.1624
218	P23284	93.98	3.24	3.24	52.241	0.00231482	0.0350345	0.0702783	1.06366	702.783	10636.6	52.241	790.661	94.8298	1	3	0	0	3	1	1	4	Peptidyl-prolyl cis-trans isomerase B (PPIB_HUMAN)	PPIB		23.7275
219	P26022	72.44	12.86	9.97333	342.09	0.014694	0.34596	0.472909	11.4287	4729.09	114287	342.09	8233.01	98.8863	4	5	5	4	5	4	8	13	Pentraxin-related protein PTX3 (PTX3_HUMAN)	PTX3	GO:0008150, GO:0048856, GO:0009058, GO:0005576, GO:0043226, GO:0044403, GO:0005575, GO:0006810, GO:0003674, GO:0006950, GO:0002376, GO:0005622, GO:0000003, GO:0040007, GO:0005615, GO:0016192, GO:0005737, GO:0030154, GO:0030198, GO:0031410, GO:0034641, GO:0031012	41.9488
220	P26038	93.1267	5.71667	2.83	62.1237	0.00269638	0.0706102	0.0865339	2.27556	865.339	22755.6	62.1237	1640.87	95.4781	3	10	6	2	10	3	4	14	Moesin (MOES_HUMAN)	MSN		67.7778
221	P29279	100	4.58	4.58	64.665	0.00286533	0.053725	0.0869921	1.6311	869.921	16311	64.665	1212.47	98.3806	1	1	0	0	0	0	1	1	CCN family member 2 (CCN2_HUMAN)	CCN2		38.0648
222	P30041	100	7.59	7.59	113.617	0.00446429	0.0771051	0.158133	2.7312	1581.33	27312	113.617	1962.34	98.75	1	2	2	1	2	1	1	2	Peroxiredoxin-6 (PRDX6_HUMAN)	PRDX6		25.0192
223	P30086	82.89	7.49	7.49	154.898	0.00645161	0.110336	0.2122	3.62907	2122	36290.7	154.898	2649.08	96.4338	1	2	0	0	2	1	1	2	Phosphatidylethanolamine-binding protein 1 (PEBP1_HUMAN)	PEBP1		21.0437
224	P30101	93.86	21.19	16.8933	180.029	0.00742778	0.304266	0.250427	9.99536	2504.27	99953.6	180.029	7245.74	98.8863	8	11	0	0	0	0	16	19	Protein disulfide-isomerase A3 (PDIA3_HUMAN)	PDIA3		56.7467
225	P31949	70.48	48.8867	37.4567	1512.18	0.0635886	0.948146	2.09267	31.5683	20926.7	315683	1512.18	22795	98.8863	4	6	6	4	6	4	10	11	Protein S100-A11 (S10AB_HUMAN)	S100A11		11.7328
226	P35052	78.32	3.23	3.23	47.3166	0.00202429	0.0378367	0.0674536	1.2608	674.536	12608	47.3166	884.41	99.5283	1	2	0	0	2	1	1	2	Glypican-1 (GPC1_HUMAN)	GPC1		61.641
227	P35527	63.72	22.4167	19.1533	230.243	0.00977252	0.524423	0.318329	17.3793	3183.29	173793	230.243	12518.2	98.8863	10	13	13	10	13	10	15	22	Keratin, type I cytoskeletal 9 (K1C9_HUMAN)	KRT9	GO:0008150, GO:0007010, GO:0005198, GO:0048856, GO:0043226, GO:0005576, GO:0005575, GO:0003674, GO:0005622, GO:0000003, GO:0005634, GO:0005615, GO:0005856, GO:0008219, GO:0005737, GO:0030154, GO:0005829	62.0268
228	P35555	68.55	1.205	0.765	18.0571	0.000721581	0.025918	0.0252489	0.907312	252.489	9073.12	18.0571	648.991	95.1551	3	7	4	2	4	2	5	9	Fibrillin-1 (FBN1_HUMAN)	FBN1		312.083
229	P35579	96.17	2.28	1.75333	27.2793	0.00113469	0.0213999	0.0376584	0.704879	376.584	7048.79	27.2793	512.298	98.8863	3	8	0	0	8	3	5	10	Myosin-9 (MYH9_HUMAN)	MYH9		226.392
230	P35908	79.81	13.46	7.87667	156.366	0.00660784	0.306833	0.217509	10.1001	2175.09	101001	156.366	7276.91	98.8863	8	12	7	5	10	6	15	24	Keratin, type II cytoskeletal 2 epidermal (K22E_HUMAN)	KRT2	GO:0008283, GO:0008150, GO:0007010, GO:0040011, GO:0048856, GO:0005198, GO:0006464, GO:0043226, GO:0005576, GO:0005575, GO:0005622, GO:0003674, GO:0005886, GO:0048870, GO:0005634, GO:0005615, GO:0005856, GO:0008219, GO:0005737, GO:0030154, GO:0005829, GO:0008092	65.3932
231	P36955	72.01	4.545	4.545	77.3132	0.00339879	0.111857	0.105425	3.47557	1054.25	34755.7	77.3132	2546.06	94.2158	2	4	0	0	0	0	3	5	Pigment epithelium-derived factor (PEDF_HUMAN)	SERPINF1		46.2833
232	P40926	86.39	14.1033	8.58	177.181	0.00748804	0.253898	0.246386	8.3109	2463.86	83109	177.181	6006.97	95.2239	4	6	0	0	4	3	5	8	Malate dehydrogenase, mitochondrial (MDHM_HUMAN)	MDH2		35.4807
233	P51884	74.56	25.74	20.6133	526.62	0.022172	0.659185	0.731946	21.9533	7319.46	219533	526.62	15809.8	98.8863	8	10	10	8	10	8	17	22	Lumican (LUM_HUMAN)	LUM		38.4048
234	P60174	88.35	15.665	10.645	165.086	0.00719545	0.284132	0.228368	8.89106	2283.68	88910.6	165.086	6484.39	94.4252	3	5	0	0	0	0	4	6	Triosephosphate isomerase (TPIS_HUMAN)	TPI1		26.6527
235	P62328	100	84.85	81.06	4916.43	0.206962	6.16004	6.83094	203.328	68309.4	2.03328e+06	4916.43	146840	98.8863	8	9	9	8	9	8	26	28	Thymosin beta-4 (TYB4_HUMAN)	TMSB4X		5.04952
236	P63313	100	63.64	53.0333	2253.41	0.094697	1.36381	3.14168	45.5528	31416.8	455528	2253.41	32801.4	98.8863	4	4	4	4	4	4	7	8	Thymosin beta-10 (TYB10_HUMAN)	TMSB10		5.02255
237	P80723	87.67	13.8033	13.8033	174.476	0.00739109	0.168205	0.240141	5.62236	2401.41	56223.6	174.476	4066.26	98.8863	2	3	2	2	3	2	3	3	Brain acid soluble protein 1 (BASP1_HUMAN)	BASP1	GO:0009790, GO:0008150, GO:0048856, GO:0009058, GO:0005694, GO:0043226, GO:0005576, GO:0005575, GO:0005622, GO:0005886, GO:0003674, GO:0000003, GO:0040007, GO:0005654, GO:0005634, GO:0003677, GO:0005615, GO:0005856, GO:0005737, GO:0030154, GO:0032991, GO:0034641	22.68
238	P98160	57.1567	0.853333	0.853333	12.5836	0.000537829	0.0208461	0.0172983	0.653498	172.983	6534.98	12.5836	479.929	98.8863	3	8	8	3	8	3	5	8	Basement membrane-specific heparan sulfate proteoglycan core protein (PGBM_HUMAN)	HSPG2		468.532
239	Q02809	88.86	3.505	3.505	60.0456	0.00256783	0.0589289	0.0816384	1.86207	816.384	18620.7	60.0456	1371.47	98.5653	2	5	2	1	4	2	3	6	Procollagen-lysine,2-oxoglutarate 5-dioxygenase 1 (PLOD1_HUMAN)	PLOD1		83.4974
240	Q02818	100	1.44667	0.723333	66.4389	0.00289226	0.0233095	0.092093	0.742203	920.93	7422.03	66.4389	535.449	94.1469	1	5	0	0	0	0	3	6	Nucleobindin-1 (NUCB1_HUMAN)	NUCB1		53.8463
241	Q08380	66.15	9.28667	8.09333	160.823	0.0068168	0.241909	0.222903	7.76786	2229.03	77678.6	160.823	5654.09	98.8863	5	7	0	0	7	5	7	10	Galectin-3-binding protein (LG3BP_HUMAN)	LGALS3BP		65.2893
242	Q08431	93.28	2.84	0	58.3155	0.00258398	0.0660505	0.0784502	2.00531	784.502	20053.1	58.3155	1490.63	93.9086	1	2	2	1	2	1	1	2	Lactadherin (MFGM_HUMAN)	MFGE8		43.0775
243	Q0QET7	87.83	13.48	13.48	129.095	0.00507246	0.211528	0.179676	7.49269	1796.76	74926.9	129.095	5383.43	98.75	2	2	0	0	0	0	3	4	Glyceraldehyde-3-phosphate dehydrogenase (Fragment) (Q0QET7_HUMAN)	GAPDH		24.6047
244	Q12841	100	24.6733	21.6433	265.579	0.0110639	0.47155	0.368451	15.369	3684.51	153690	265.579	11095.8	98.8863	7	10	0	0	0	0	11	18	Follistatin-related protein 1 (FSTL1_HUMAN)	FSTL1		34.9629
245	Q14019	80.99	14.08	8.45	158.93	0.00704225	0.245197	0.213805	7.44424	2138.05	74442.4	158.93	5533.63	93.9726	2	4	4	2	4	2	1	6	Coactosin-like protein (COTL1_HUMAN)	COTL1		15.935
246	Q15084	83.86	3.41	3.41	68.9708	0.00271003	0.0481131	0.095994	1.70425	959.94	17042.5	68.9708	1224.49	98.75	1	1	1	1	1	1	1	2	Protein disulfide-isomerase A6 (PDIA6_HUMAN)	PDIA6		48.0913
247	Q15293	81.57	8.155	5.74	101.578	0.0041806	0.0749169	0.13962	2.52933	1396.2	25293.3	101.578	1835.84	98.5653	2	3	3	2	3	2	2	3	Reticulocalbin-1 (RCN1_HUMAN)	RCN1		38.8662
248	Q16270	73.4	58.51	52.7167	883.994	0.037293	1.50102	1.2284	49.7355	12284	497355	883.994	35824.3	98.8863	13	15	10	9	15	13	35	41	Insulin-like growth factor-binding protein 7 (IBP7_HUMAN)	IGFBP7		29.1114
249	Q16610	82.78	3.08667	2.46667	34.9506	0.00143583	0.0798491	0.0480644	2.58368	480.644	25836.8	34.9506	1892.83	94.0598	2	3	2	1	3	2	2	5	Extracellular matrix protein 1 (ECM1_HUMAN)	ECM1		60.6353
250	Q16658	94.12	3.25	3.25	69.4833	0.0030426	0.0397984	0.0953779	1.26723	953.779	12672.3	69.4833	914.219	98.9544	1	1	1	1	1	1	2	2	Fascin (FSCN1_HUMAN)	FSCN1		54.4961
251	Q562Z4	71.84	46.6	46.6	1620.67	0.0679612	0.519911	2.24847	17.1751	22484.7	171751	1620.67	12372.6	98.8863	2	4	2	1	2	1	10	12	Actin-like protein (Fragment) (Q562Z4_HUMAN)	ACT		11.548
252	Q56G89	95.57	15.93	15.93	617.747	0.0242728	1.15443	0.859784	40.8921	8597.84	408921	617.747	29380.6	98.75	27	38	1	0	1	0	103	140	Serum albumin (Q56G89_HUMAN)			69.0393
253	Q5H9A7	100	70.63	63.285	1902.33	0.0829348	7.67821	2.63053	242.526	26305.3	2.42526e+06	1902.33	175845	98.9544	14	20	0	0	0	0	48	56	Metalloproteinase inhibitor 1 (Q5H9A7_HUMAN)	TIMP1		16.0468
254	Q71V99	83.54	8.54	8.54	465.553	0.0182927	0.115884	0.647959	4.10482	6479.59	41048.2	465.553	2949.27	90.1408	1	1	0	0	0	0	3	3	Peptidyl-prolyl cis-trans isomerase (Q71V99_HUMAN)			17.9599
255	Q86UY0	90.83	7.22667	6.39333	109.773	0.00450221	0.117002	0.152606	3.80337	1526.06	38033.7	109.773	2766.99	98.8863	2	3	2	1	3	2	3	4	TXNDC5 protein (Q86UY0_HUMAN)	TXNDC5		40.3439
256	Q9BUD6	52.3633	20.5433	15.2067	912.088	0.0387446	0.688383	1.25696	22.7147	12569.6	227147	912.088	16419.9	98.8863	7	10	10	7	10	7	15	23	Spondin-2 (SPON2_HUMAN)	SPON2	GO:0008150, GO:0043167, GO:0007155, GO:0008289, GO:0005576, GO:0043226, GO:0005575, GO:0006810, GO:0003674, GO:0002376, GO:0006950, GO:0005615, GO:0016192, GO:0031012	35.8238
257	Q9UBR2	70.63	3.63	3.63	44.5974	0.00175234	0.0893843	0.0620709	3.16615	620.709	31661.5	44.5974	2274.85	92.1148	1	2	0	0	2	1	1	3	Cathepsin Z (CATZ_HUMAN)	CTSZ		33.8462
258	Q9Y4D1	86.73	2.32	2.32	252.28	0.0107415	0.014587	0.347992	0.481878	3479.92	4818.78	252.28	347.136	98.8863	1	2	1	1	2	1	16	24	Disheveled-associated activator of morphogenesis 1 (DAAM1_HUMAN)	DAAM1		123.396
259	Q9Y4K0	67.18	8.00667	7.62	91.5285	0.00395326	0.158633	0.126983	5.09065	1269.83	50906.5	91.5285	3686.97	98.8863	5	7	4	2	6	4	7	10	Lysyl oxidase homolog 2 (LOXL2_HUMAN)	LOXL2		86.6683
