# Supplementary material for: Human Wharton’s Jelly Mesenchymal Stem Cells Secretome Inhibits Human SARS-CoV-2 and Avian Infectious Bronchitis Coronaviruses
Source: Cells. 2022 Apr 21;11(9):1408. doi: 10.3390/cells11091408 (PMC9101656; doi:10.3390/cells11091408)
Supplement: Supplementary file 1 [file cells-11-01408-s001.zip › Table S3.xlsx]

## Sheet: Gene Ontology
	GO	Homo.sapiens...REFLIST..20595.	upload_1..184.	upload_1..fold.Enrichment.	upload_1..FDR.	type
39	response to methamphetamine hydrochloride	2	2	100	0.0198	Biological Process
49	negative regulation of plasminogen activation	6	5	93.27	3.15e-06	Biological Process
50	negative regulation of endodermal cell differentiation	3	2	74.62	0.0305	Biological Process
51	regulation of activation of membrane attack complex	3	2	74.62	0.0304	Biological Process
52	positive regulation of substrate-dependent cell migration, cell attachment to substrate	3	2	74.62	0.0303	Biological Process
53	regulation of substrate-dependent cell migration, cell attachment to substrate	3	2	74.62	0.0303	Biological Process
54	negative regulation of fibrinolysis	10	5	55.96	1.58e-05	Biological Process
67	astrocyte activation involved in immune response	4	2	55.96	0.0411	Biological Process
102	sequestering of TGFbeta in extracellular matrix	4	2	55.96	0.041	Biological Process
118	regulation of transepithelial transport	4	2	55.96	0.0409	Biological Process
123	regulation of plasminogen activation	13	6	51.66	1.64e-06	Biological Process
124	protein folding in endoplasmic reticulum	11	5	50.88	2.22e-05	Biological Process
125	bone trabecula formation	7	3	47.97	0.00449	Biological Process
130	opsonization	8	3	41.97	0.0059	Biological Process
131	regulation of fibrinolysis	14	5	39.97	5.1e-05	Biological Process
182	blood coagulation, fibrin clot formation	9	3	37.31	0.0074	Biological Process
183	positive regulation of receptor binding	9	3	37.31	0.00737	Biological Process
184	bone trabecula morphogenesis	10	3	33.58	0.00931	Biological Process
192	positive regulation of osteoblast proliferation	11	3	30.53	0.0111	Biological Process
193	protein activation cascade	11	3	30.53	0.0111	Biological Process
194	fibrinolysis	19	5	29.46	0.000162	Biological Process
195	peptide cross-linking	35	9	28.78	2.97e-08	Biological Process
196	collagen-activated tyrosine kinase receptor signaling pathway	12	3	27.98	0.0132	Biological Process
268	glycolytic process	40	9	25.18	7.8e-08	Biological Process
276	ATP generation from ADP	41	9	24.57	9.32e-08	Biological Process
277	positive regulation of hemostasis	23	5	24.33	0.000338	Biological Process
278	positive regulation of blood coagulation	23	5	24.33	0.000336	Biological Process
279	positive regulation by host of viral process	14	3	23.98	0.0182	Biological Process
280	protein refolding	19	4	23.56	0.00281	Biological Process
281	collagen fibril organization	57	12	23.56	3.44e-10	Biological Process
282	positive regulation of coagulation	24	5	23.32	0.000391	Biological Process
283	platelet aggregation	44	9	22.89	1.52e-07	Biological Process
347	nucleoside diphosphate phosphorylation	59	11	20.87	6.77e-09	Biological Process
348	ADP metabolic process	49	9	20.56	3.3e-07	Biological Process
358	nucleotide phosphorylation	61	11	20.18	8.89e-09	Biological Process
359	collagen-activated signaling pathway	17	3	19.75	0.0282	Biological Process
360	modulation by host of viral process	29	5	19.3	0.000807	Biological Process
416	negative regulation of protein processing	30	5	18.65	0.000918	Biological Process
417	protein localization to cell-cell junction	18	3	18.65	0.0312	Biological Process
418	negative regulation of protein maturation	30	5	18.65	0.000914	Biological Process
419	epiboly involved in wound healing	25	4	17.91	0.00649	Biological Process
420	wound healing, spreading of cells	25	4	17.91	0.00646	Biological Process
421	negative regulation of coagulation	50	8	17.91	5.19e-06	Biological Process
422	hyaluronan metabolic process	25	4	17.91	0.00644	Biological Process
427	epiboly	26	4	17.22	0.00721	Biological Process
434	homotypic cell-cell adhesion	59	9	17.07	1.32e-06	Biological Process
435	negative regulation of blood coagulation	46	7	17.03	4.04e-05	Biological Process
436	trabecula formation	20	3	16.79	0.0389	Biological Process
437	negative regulation of oxidative stress-induced intrinsic apoptotic signaling pathway	20	3	16.79	0.0388	Biological Process
438	endodermal cell differentiation	40	6	16.79	0.000251	Biological Process
439	regulation of complement activation	20	3	16.79	0.0387	Biological Process
440	negative regulation of hemostasis	47	7	16.67	4.52e-05	Biological Process
441	pyruvate metabolic process	61	9	16.51	1.67e-06	Biological Process
442	purine ribonucleoside diphosphate metabolic process	62	9	16.25	1.86e-06	Biological Process
443	purine nucleoside diphosphate metabolic process	62	9	16.25	1.84e-06	Biological Process
453	regulation of endothelial cell chemotaxis	21	3	15.99	0.0428	Biological Process
479	regulation of receptor binding	21	3	15.99	0.0427	Biological Process
496	ribonucleoside diphosphate metabolic process	65	9	15.5	2.6e-06	Biological Process
497	regulation of oxidative stress-induced intrinsic apoptotic signaling pathway	29	4	15.44	0.00991	Biological Process
498	hydrogen peroxide catabolic process	29	4	15.44	0.00988	Biological Process
499	positive regulation of transforming growth factor beta production	22	3	15.26	0.0475	Biological Process
500	cartilage condensation	22	3	15.26	0.0474	Biological Process
509	positive regulation of response to wounding	68	9	14.81	3.46e-06	Biological Process
510	nucleoside diphosphate metabolic process	84	11	14.66	1.41e-07	Biological Process
512	negative regulation of cell-substrate adhesion	62	8	14.44	2.08e-05	Biological Process
513	regulation of coagulation	71	9	14.19	4.71e-06	Biological Process
516	retina homeostasis	80	10	13.99	1.12e-06	Biological Process
557	positive regulation of wound healing	57	7	13.75	0.000133	Biological Process
558	endoderm formation	49	6	13.71	0.000645	Biological Process
559	regulation of transforming growth factor beta production	41	5	13.65	0.00316	Biological Process
560	regulation of blood coagulation	66	8	13.57	3.01e-05	Biological Process
569	regulation of hemostasis	68	8	13.17	3.62e-05	Biological Process
620	positive regulation of phagocytosis	64	7	12.24	0.000253	Biological Process
621	cell redox homeostasis	37	4	12.1	0.0198	Biological Process
623	platelet activation	94	10	11.91	3.83e-06	Biological Process
624	regulation of protein processing	66	7	11.87	0.000301	Biological Process
632	regulation of substrate adhesion-dependent cell spreading	58	6	11.58	0.0014	Biological Process
633	regulation of protein maturation	68	7	11.52	0.00035	Biological Process
676	negative regulation of wound healing	70	7	11.19	0.00041	Biological Process
677	blood coagulation	170	17	11.19	3.45e-10	Biological Process
680	coagulation	172	17	11.06	3.92e-10	Biological Process
681	defense response to fungus	51	5	10.97	0.00721	Biological Process
682	hemostasis	174	17	10.94	4.35e-10	Biological Process
683	hydrogen peroxide metabolic process	41	4	10.92	0.0272	Biological Process
684	negative regulation of angiogenesis	103	10	10.87	7.62e-06	Biological Process
686	response to fungus	62	6	10.83	0.00192	Biological Process
687	negative regulation of blood vessel morphogenesis	104	10	10.76	8.17e-06	Biological Process
690	response to testosterone	42	4	10.66	0.0293	Biological Process
692	positive regulation of nitric oxide biosynthetic process	42	4	10.66	0.0292	Biological Process
695	negative regulation of vasculature development	105	10	10.66	8.82e-06	Biological Process
696	positive regulation of substrate adhesion-dependent cell spreading	42	4	10.66	0.0291	Biological Process
697	negative regulation of peptidase activity	255	24	10.53	6.43e-14	Biological Process
698	negative regulation of endopeptidase activity	247	23	10.42	2.48e-13	Biological Process
699	acute-phase response	43	4	10.41	0.0307	Biological Process
700	positive regulation of nitric oxide metabolic process	43	4	10.41	0.0306	Biological Process
701	positive regulation of actin filament bundle assembly	65	6	10.33	0.00243	Biological Process
728	positive regulation of blood vessel endothelial cell migration	55	5	10.18	0.00959	Biological Process
733	positive regulation of receptor-mediated endocytosis	55	5	10.18	0.00956	Biological Process
740	regulation of collagen metabolic process	44	4	10.18	0.0329	Biological Process
744	regulation of viral entry into host cell	44	4	10.18	0.0328	Biological Process
751	regulation of oxidative stress-induced cell death	67	6	10.02	0.00281	Biological Process
752	chaperone-mediated protein folding	67	6	10.02	0.0028	Biological Process
753	collagen metabolic process	56	5	9.99	0.0101	Biological Process
754	antibacterial humoral response	56	5	9.99	0.0101	Biological Process
755	negative regulation of oxidative stress-induced cell death	45	4	9.95	0.0346	Biological Process
756	apoptotic cell clearance	45	4	9.95	0.0345	Biological Process
759	biological process involved in interaction with symbiont	92	8	9.73	0.000246	Biological Process
760	cellular response to amino acid stimulus	69	6	9.73	0.00322	Biological Process
768	carbohydrate catabolic process	104	9	9.69	6.69e-05	Biological Process
769	extracellular matrix organization	266	23	9.68	1.04e-12	Biological Process
770	extracellular structure organization	267	23	9.64	1.07e-12	Biological Process
771	cellular oxidant detoxification	93	8	9.63	0.000261	Biological Process
773	external encapsulating structure organization	269	23	9.57	1.18e-12	Biological Process
774	substantia nigra development	47	4	9.53	0.0391	Biological Process
793	morphogenesis of an epithelial sheet	48	4	9.33	0.0413	Biological Process
823	maintenance of protein location	97	8	9.23	0.000339	Biological Process
824	modulation by host of symbiont process	61	5	9.17	0.0135	Biological Process
825	morphogenesis of a polarized epithelium	49	4	9.14	0.0438	Biological Process
826	negative regulation of response to wounding	86	7	9.11	0.00123	Biological Process
829	endoderm development	75	6	8.95	0.00474	Biological Process
840	wound healing	325	26	8.95	9.87e-14	Biological Process
841	cartilage development	152	12	8.84	3.48e-06	Biological Process
844	regulation of wound healing	127	10	8.81	3.93e-05	Biological Process
845	modulation by symbiont of entry into host	51	4	8.78	0.0496	Biological Process
846	negative regulation of myeloid leukocyte differentiation	51	4	8.78	0.0495	Biological Process
847	regulation of biological process involved in symbiotic interaction	77	6	8.72	0.00531	Biological Process
862	cellular response to acid chemical	78	6	8.61	0.00566	Biological Process
881	regulation of cellular response to oxidative stress	78	6	8.61	0.00564	Biological Process
893	regulation of response to wounding	158	12	8.5	4.87e-06	Biological Process
895	regulation of phagocytosis	93	7	8.42	0.00191	Biological Process
897	mucopolysaccharide metabolic process	80	6	8.39	0.00636	Biological Process
898	maintenance of location in cell	94	7	8.34	0.00201	Biological Process
902	cellular detoxification	108	8	8.29	0.000652	Biological Process
907	chondrocyte differentiation	68	5	8.23	0.0201	Biological Process
908	positive regulation of endothelial cell migration	109	8	8.21	0.000689	Biological Process
909	negative regulation of hydrolase activity	369	27	8.19	1.69e-13	Biological Process
910	maintenance of location	164	12	8.19	6.77e-06	Biological Process
911	regulation of cell-substrate adhesion	219	16	8.18	6.45e-08	Biological Process
912	negative regulation of proteolysis	343	25	8.16	1.92e-12	Biological Process
913	protein folding	209	15	8.03	2.58e-07	Biological Process
962	response to amino acid	115	8	7.79	0.000947	Biological Process
971	cellular response to toxic substance	116	8	7.72	0.001	Biological Process
974	regulation of response to oxidative stress	87	6	7.72	0.00913	Biological Process
975	regulation of peptidase activity	452	31	7.68	8.76e-15	Biological Process
977	regulation of actin filament bundle assembly	103	7	7.61	0.00335	Biological Process
978	response to wounding	428	29	7.58	9.69e-14	Biological Process
979	ossification	268	18	7.52	1.92e-08	Biological Process
981	regulation of stress fiber assembly	90	6	7.46	0.0104	Biological Process
1015	acute inflammatory response	76	5	7.36	0.0302	Biological Process
1016	protein localization to cell junction	76	5	7.36	0.0301	Biological Process
1017	proteoglycan metabolic process	76	5	7.36	0.0301	Biological Process
1018	regulation of bone mineralization	76	5	7.36	0.03	Biological Process
1019	detoxification	137	9	7.35	0.00047	Biological Process
1026	angiogenesis	310	20	7.22	4.28e-09	Biological Process
1037	connective tissue development	202	13	7.2	7.63e-06	Biological Process
1038	regulation of endothelial cell migration	171	11	7.2	6.36e-05	Biological Process
1040	regulation of endopeptidase activity	424	27	7.13	2.93e-12	Biological Process
1041	regulation of body fluid levels	367	23	7.01	2.89e-10	Biological Process
1042	formation of primary germ layer	112	7	7	0.00522	Biological Process
1043	modulation of process of other organism involved in symbiotic interaction	80	5	7	0.0353	Biological Process
1045	regulation of cell morphogenesis involved in differentiation	96	6	7	0.0135	Biological Process
1074	supramolecular fiber organization	512	32	7	2.21e-14	Biological Process
1083	response to cAMP	97	6	6.92	0.0141	Biological Process
1085	integrin-mediated signaling pathway	98	6	6.85	0.0147	Biological Process
1086	regulation of actomyosin structure organization	98	6	6.85	0.0147	Biological Process
1087	tissue remodeling	98	6	6.85	0.0146	Biological Process
1090	regulation of angiogenesis	280	17	6.8	2.32e-07	Biological Process
1091	tissue migration	99	6	6.78	0.0153	Biological Process
1100	regulation of vasculature development	284	17	6.7	2.72e-07	Biological Process
1102	positive regulation of epithelial cell migration	151	9	6.67	0.000899	Biological Process
1103	glucose metabolic process	101	6	6.65	0.0167	Biological Process
1104	reactive oxygen species metabolic process	101	6	6.65	0.0167	Biological Process
1105	antimicrobial humoral immune response mediated by antimicrobial peptide	102	6	6.58	0.0173	Biological Process
1116	response to acid chemical	136	8	6.58	0.00268	Biological Process
1141	response to monosaccharide	157	9	6.42	0.00116	Biological Process
1146	blood vessel morphogenesis	404	23	6.37	1.52e-09	Biological Process
1152	tissue homeostasis	232	13	6.27	3e-05	Biological Process
1192	positive regulation of cell-substrate adhesion	128	7	6.12	0.01	Biological Process
1207	response to reactive oxygen species	186	10	6.02	0.000721	Biological Process
1208	glycosaminoglycan metabolic process	112	6	6	0.0265	Biological Process
1209	blood vessel development	486	26	5.99	2.71e-10	Biological Process
1210	response to carbohydrate	187	10	5.99	0.000744	Biological Process
1245	regulation of epithelial cell migration	230	12	5.84	0.000151	Biological Process
1252	regulation of cell morphogenesis	310	16	5.78	4.67e-06	Biological Process
1254	response to organophosphorus	136	7	5.76	0.0133	Biological Process
1255	regulation of mononuclear cell migration	117	6	5.74	0.031	Biological Process
1260	vasculature development	509	26	5.72	5.96e-10	Biological Process
1263	anatomical structure homeostasis	278	14	5.64	3.55e-05	Biological Process
1264	skeletal system development	478	24	5.62	5.13e-09	Biological Process
1265	positive regulation of angiogenesis	160	8	5.6	0.00691	Biological Process
1285	positive regulation of vasculature development	160	8	5.6	0.00689	Biological Process
1289	response to unfolded protein	120	6	5.6	0.0343	Biological Process
1291	antimicrobial humoral response	141	7	5.56	0.0156	Biological Process
1292	cell-cell junction assembly	121	6	5.55	0.0353	Biological Process
1293	response to hydrogen peroxide	121	6	5.55	0.0352	Biological Process
1294	negative regulation of protein catabolic process	121	6	5.55	0.0351	Biological Process
1295	ATP metabolic process	202	10	5.54	0.0013	Biological Process
1301	aminoglycan metabolic process	123	6	5.46	0.0377	Biological Process
1305	hexose metabolic process	144	7	5.44	0.0175	Biological Process
1306	response to estradiol	144	7	5.44	0.0174	Biological Process
1307	response to glucose	144	7	5.44	0.0174	Biological Process
1313	cell killing	125	6	5.37	0.0402	Biological Process
1314	actin filament organization	271	13	5.37	0.000136	Biological Process
1315	negative regulation of cellular component movement	293	14	5.35	5.96e-05	Biological Process
1342	cell-matrix adhesion	126	6	5.33	0.0412	Biological Process
1344	biological process involved in symbiotic interaction	234	11	5.26	0.00085	Biological Process
1349	osteoblast differentiation	129	6	5.21	0.0455	Biological Process
1355	response to hexose	151	7	5.19	0.0221	Biological Process
1359	regulation of proteolysis	738	34	5.16	4.98e-12	Biological Process
1361	protein stabilization	196	9	5.14	0.00519	Biological Process
1362	negative regulation of cell adhesion	285	13	5.11	0.000222	Biological Process
1363	negative regulation of cell motility	285	13	5.11	0.000221	Biological Process
1372	response to purine-containing compound	154	7	5.09	0.0244	Biological Process
1395	regulation of cell shape	155	7	5.05	0.0253	Biological Process
1400	gastrulation	156	7	5.02	0.0262	Biological Process
1404	ameboidal-type cell migration	180	8	4.97	0.0129	Biological Process
1408	negative regulation of cell migration	270	12	4.97	0.000615	Biological Process
1416	aging	296	13	4.92	0.000317	Biological Process
1451	regulation of lipid biosynthetic process	162	7	4.84	0.0307	Biological Process
1452	skin development	232	10	4.82	0.00363	Biological Process
1455	regulation of synapse organization	210	9	4.8	0.00782	Biological Process
1463	negative regulation of catalytic activity	777	33	4.75	9.06e-11	Biological Process
1464	monosaccharide metabolic process	165	7	4.75	0.0334	Biological Process
1469	regulation of viral process	166	7	4.72	0.0343	Biological Process
1470	tube morphogenesis	644	27	4.69	1.12e-08	Biological Process
1471	response to oxidative stress	382	16	4.69	5.13e-05	Biological Process
1486	response to corticosteroid	168	7	4.66	0.0356	Biological Process
1496	regulation of synapse structure or activity	217	9	4.64	0.00962	Biological Process
1497	cell-cell junction organization	169	7	4.64	0.0367	Biological Process
1504	positive regulation of peptidase activity	195	8	4.59	0.0198	Biological Process
1505	negative regulation of locomotion	317	13	4.59	0.000595	Biological Process
1516	actin cytoskeleton organization	539	22	4.57	8.97e-07	Biological Process
1517	negative regulation of apoptotic signaling pathway	221	9	4.56	0.0106	Biological Process
1519	muscle contraction	222	9	4.54	0.0109	Biological Process
1521	response to mechanical stimulus	222	9	4.54	0.0109	Biological Process
1526	gliogenesis	224	9	4.5	0.0114	Biological Process
1555	regulation of anatomical structure morphogenesis	908	36	4.44	4.72e-11	Biological Process
1560	response to steroid hormone	281	11	4.38	0.00361	Biological Process
1561	circulatory system development	870	34	4.37	2.91e-10	Biological Process
1562	cell adhesion	952	37	4.35	4.02e-11	Biological Process
1566	biological adhesion	958	37	4.32	4.66e-11	Biological Process
1596	actin filament-based process	599	23	4.3	1.15e-06	Biological Process
1597	positive regulation of cell migration	522	20	4.29	8.95e-06	Biological Process
1601	regulation of hydrolase activity	1033	39	4.23	1.9e-11	Biological Process
1611	anatomical structure formation involved in morphogenesis	881	33	4.19	1.57e-09	Biological Process
1614	cellular response to growth factor stimulus	455	17	4.18	9.74e-05	Biological Process
1616	negative regulation of response to external stimulus	376	14	4.17	0.000732	Biological Process
1617	response to growth factor	485	18	4.15	5.32e-05	Biological Process
1625	multicellular organismal homeostasis	351	13	4.15	0.00147	Biological Process
1648	regulation of cell migration	894	33	4.13	2.25e-09	Biological Process
1649	response to endoplasmic reticulum stress	217	8	4.13	0.0343	Biological Process
1651	tube development	845	31	4.11	9.56e-09	Biological Process
1652	response to toxic substance	246	9	4.09	0.0198	Biological Process
1653	positive regulation of cell motility	547	20	4.09	1.79e-05	Biological Process
1662	negative regulation of multicellular organismal process	991	36	4.07	3.87e-10	Biological Process
1663	response to inorganic substance	554	20	4.04	2.14e-05	Biological Process
1665	regulation of actin filament organization	278	10	4.03	0.0122	Biological Process
1668	purine ribonucleotide metabolic process	306	11	4.02	0.00685	Biological Process
1669	skeletal system morphogenesis	223	8	4.02	0.0393	Biological Process
1701	positive regulation of cellular component movement	560	20	4	2.46e-05	Biological Process
1702	muscle cell differentiation	252	9	4	0.0228	Biological Process
1703	humoral immune response	337	12	3.99	0.00399	Biological Process
1704	positive regulation of locomotion	562	20	3.98	2.55e-05	Biological Process
1709	regulation of cell adhesion	737	26	3.95	6.39e-07	Biological Process
1719	cell-cell adhesion	515	18	3.91	0.000114	Biological Process
1720	cell junction assembly	258	9	3.9	0.0265	Biological Process
1723	regulation of cell motility	950	33	3.89	8.51e-09	Biological Process
1725	synapse organization	289	10	3.87	0.0153	Biological Process
1752	negative regulation of molecular function	1132	39	3.86	2.19e-10	Biological Process
1753	purine nucleotide metabolic process	320	11	3.85	0.00943	Biological Process
1756	regulation of cellular component movement	1025	35	3.82	3.68e-09	Biological Process
1760	negative regulation of protein metabolic process	1028	35	3.81	3.91e-09	Biological Process
1762	ribonucleotide metabolic process	324	11	3.8	0.0101	Biological Process
1768	regulation of supramolecular fiber organization	384	13	3.79	0.00334	Biological Process
1769	tissue development	1597	54	3.78	1.51e-14	Biological Process
1774	positive regulation of response to external stimulus	417	14	3.76	0.00197	Biological Process
1776	muscle structure development	477	16	3.75	0.000621	Biological Process
1778	regulation of actin cytoskeleton organization	359	12	3.74	0.00661	Biological Process
1794	regulation of locomotion	990	33	3.73	2.03e-08	Biological Process
1811	negative regulation of cellular protein metabolic process	962	32	3.72	4.08e-08	Biological Process
1812	muscle system process	271	9	3.72	0.0342	Biological Process
1820	response to oxygen levels	334	11	3.69	0.0124	Biological Process
1823	ribose phosphate metabolic process	335	11	3.68	0.0127	Biological Process
1826	regulation of protein stability	306	10	3.66	0.0223	Biological Process
1827	regulation of actin filament-based process	398	13	3.66	0.00457	Biological Process
1829	negative regulation of cell death	982	32	3.65	6.49e-08	Biological Process
1830	response to decreased oxygen levels	307	10	3.65	0.0228	Biological Process
1862	purine-containing compound metabolic process	342	11	3.6	0.0145	Biological Process
1865	regulation of inflammatory response	343	11	3.59	0.0147	Biological Process
1868	cell activation	625	20	3.58	0.000108	Biological Process
1869	inflammatory response	502	16	3.57	0.00105	Biological Process
1872	regulation of cellular response to growth factor stimulus	284	9	3.55	0.0437	Biological Process
1873	positive regulation of cell adhesion	442	14	3.55	0.00345	Biological Process
1875	regulation of apoptotic signaling pathway	348	11	3.54	0.0163	Biological Process
1876	regulation of neuron projection development	443	14	3.54	0.00352	Biological Process
1881	tissue morphogenesis	542	17	3.51	0.000732	Biological Process
1906	negative regulation of apoptotic process	870	27	3.47	3.48e-06	Biological Process
1907	cell migration	840	26	3.46	6.15e-06	Biological Process
1910	negative regulation of developmental process	877	27	3.45	3.95e-06	Biological Process
1911	positive regulation of developmental process	1267	39	3.45	4.12e-09	Biological Process
1913	generation of precursor metabolites and energy	391	12	3.44	0.0124	Biological Process
1919	negative regulation of programmed cell death	888	27	3.4	4.9e-06	Biological Process
1920	regulation of lipid metabolic process	329	10	3.4	0.0343	Biological Process
1923	regulation of cell development	495	15	3.39	0.0031	Biological Process
1950	morphogenesis of an epithelium	437	13	3.33	0.0098	Biological Process
1951	response to molecule of bacterial origin	337	10	3.32	0.0395	Biological Process
1952	regulation of epithelial cell proliferation	338	10	3.31	0.0402	Biological Process
1954	regulation of cell death	1593	47	3.3	1.36e-10	Biological Process
1966	localization of cell	986	29	3.29	3.2e-06	Biological Process
1967	cell motility	986	29	3.29	3.17e-06	Biological Process
1978	cell junction organization	477	14	3.29	0.00686	Biological Process
1982	epithelium development	962	28	3.26	6.22e-06	Biological Process
1983	response to endogenous stimulus	1342	39	3.25	1.65e-08	Biological Process
1988	cellular response to endogenous stimulus	1070	31	3.24	1.52e-06	Biological Process
1989	response to metal ion	380	11	3.24	0.0302	Biological Process
1990	reproductive structure development	415	12	3.24	0.0189	Biological Process
1991	response to peptide	450	13	3.23	0.0122	Biological Process
1992	regulation of MAPK cascade	658	19	3.23	0.000688	Biological Process
1994	regulation of plasma membrane bounded cell projection organization	626	18	3.22	0.00116	Biological Process
1995	regulation of apoptotic process	1426	41	3.22	7.82e-09	Biological Process
1996	reproductive system development	418	12	3.21	0.0199	Biological Process
1997	cellular response to lipid	488	14	3.21	0.00826	Biological Process
2023	response to xenobiotic stimulus	456	13	3.19	0.0133	Biological Process
2029	epithelial cell differentiation	530	15	3.17	0.00593	Biological Process
2030	cellular response to organonitrogen compound	566	16	3.16	0.00374	Biological Process
2031	negative regulation of response to stimulus	1559	44	3.16	2.72e-09	Biological Process
2035	regulation of programmed cell death	1456	41	3.15	1.28e-08	Biological Process
2040	regulation of cell projection organization	643	18	3.13	0.00159	Biological Process
2042	response to organic cyclic compound	896	25	3.12	5.76e-05	Biological Process
2043	regulation of multicellular organismal development	1294	36	3.11	2.55e-07	Biological Process
2069	positive regulation of cell differentiation	833	23	3.09	0.000182	Biological Process
2070	immune effector process	435	12	3.09	0.027	Biological Process
2076	response to organonitrogen compound	984	27	3.07	2.98e-05	Biological Process
2077	regulation of response to stress	1240	34	3.07	1.05e-06	Biological Process
2080	response to hormone	772	21	3.04	0.000569	Biological Process
2081	cellular response to organic cyclic compound	515	14	3.04	0.0127	Biological Process
2093	regulation of developmental process	2368	64	3.03	1.62e-13	Biological Process
2101	response to oxygen-containing compound	1567	42	3	2.92e-08	Biological Process
2105	cell population proliferation	486	13	2.99	0.022	Biological Process
2108	regulation of cellular response to stress	637	17	2.99	0.00433	Biological Process
2112	negative regulation of signal transduction	1204	32	2.97	4.98e-06	Biological Process
2115	response to lipid	829	22	2.97	0.000503	Biological Process
2116	regulation of response to external stimulus	906	24	2.97	0.000214	Biological Process
2118	regulation of vesicle-mediated transport	529	14	2.96	0.0157	Biological Process
2138	anatomical structure morphogenesis	2130	56	2.94	4.8e-11	Biological Process
2139	positive regulation of multicellular organismal process	1412	37	2.93	6.65e-07	Biological Process
2141	response to nitrogen compound	1071	28	2.93	4.28e-05	Biological Process
2142	animal organ morphogenesis	957	25	2.92	0.000168	Biological Process
2145	response to cytokine	807	21	2.91	0.000998	Biological Process
2150	negative regulation of intracellular signal transduction	501	13	2.9	0.0281	Biological Process
2151	cellular response to oxygen-containing compound	1043	27	2.9	7.86e-05	Biological Process
2154	positive regulation of cytokine production	465	12	2.89	0.0412	Biological Process
2157	cytoskeleton organization	1169	30	2.87	2.49e-05	Biological Process
2172	carbohydrate metabolic process	469	12	2.86	0.0436	Biological Process
2173	cellular response to nitrogen compound	626	16	2.86	0.0099	Biological Process
2176	movement of cell or subcellular component	1413	36	2.85	2.04e-06	Biological Process
2184	regulation of cytokine production	715	18	2.82	0.00529	Biological Process
2187	locomotion	1195	30	2.81	3.71e-05	Biological Process
2200	positive regulation of intracellular signal transduction	960	24	2.8	0.0005	Biological Process
2201	central nervous system development	1002	25	2.79	0.000341	Biological Process
2202	response to abiotic stimulus	1125	28	2.79	0.000101	Biological Process
2203	response to stress	3336	83	2.78	2.93e-16	Biological Process
2209	cellular response to organic substance	1980	49	2.77	1.02e-08	Biological Process
2212	embryonic morphogenesis	568	14	2.76	0.0285	Biological Process
2213	negative regulation of cell communication	1301	32	2.75	2.39e-05	Biological Process
2217	negative regulation of signaling	1305	32	2.74	2.51e-05	Biological Process
2234	regulation of cellular component biogenesis	950	23	2.71	0.00116	Biological Process
2235	negative regulation of cell population proliferation	704	17	2.7	0.0114	Biological Process
2239	regulation of defense response	581	14	2.7	0.0333	Biological Process
2240	positive regulation of organelle organization	583	14	2.69	0.0343	Biological Process
2243	positive regulation of gene expression	1128	27	2.68	0.000297	Biological Process
2265	defense response	1387	33	2.66	3.01e-05	Biological Process
2266	cellular response to chemical stimulus	2567	61	2.66	1.61e-10	Biological Process
2267	biological process involved in interspecies interaction between organisms	1519	36	2.65	9.57e-06	Biological Process
2269	head development	806	19	2.64	0.00727	Biological Process
2270	regulation of intracellular signal transduction	1655	39	2.64	3.4e-06	Biological Process
2275	positive regulation of cell population proliferation	935	22	2.63	0.00253	Biological Process
2278	response to organic substance	2688	63	2.62	1.11e-10	Biological Process
2279	regulation of catalytic activity	2393	56	2.62	2.77e-09	Biological Process
2297	animal organ development	3079	71	2.58	4.34e-12	Biological Process
2301	innate immune response	783	18	2.57	0.013	Biological Process
2303	negative regulation of gene expression	879	20	2.55	0.00759	Biological Process
2330	system development	4169	94	2.52	2.06e-16	Biological Process
2332	regulation of multicellular organismal process	2578	58	2.52	4.47e-09	Biological Process
2333	homeostatic process	1556	35	2.52	4.33e-05	Biological Process
2336	regulation of protein metabolic process	2492	56	2.52	1.03e-08	Biological Process
2338	regulation of cell population proliferation	1650	37	2.51	2.26e-05	Biological Process
2344	positive regulation of cellular component organization	1119	25	2.5	0.00173	Biological Process
2345	regulation of cellular protein metabolic process	2328	52	2.5	9.65e-08	Biological Process
2361	negative regulation of cellular component organization	722	16	2.48	0.0342	Biological Process
2365	multicellular organism development	4525	100	2.47	3.34e-17	Biological Process
2369	regulation of cell differentiation	1496	33	2.47	0.00019	Biological Process
2372	regulation of cellular component organization	2359	52	2.47	1.24e-07	Biological Process
2373	positive regulation of transport	909	20	2.46	0.0108	Biological Process
2399	carbohydrate derivative metabolic process	922	20	2.43	0.0126	Biological Process
2428	response to biotic stimulus	1418	30	2.37	0.000875	Biological Process
2429	response to other organism	1372	29	2.37	0.00122	Biological Process
2430	response to external biotic stimulus	1373	29	2.36	0.00123	Biological Process
2443	regulation of molecular function	3060	64	2.34	6.15e-09	Biological Process
2465	anatomical structure development	5001	103	2.31	4.23e-16	Biological Process
2469	regulation of biological quality	3705	76	2.3	1.28e-10	Biological Process
2487	positive regulation of catalytic activity	1134	23	2.27	0.0124	Biological Process
2490	defense response to other organism	989	20	2.26	0.0299	Biological Process
2495	positive regulation of response to stimulus	2080	42	2.26	4.69e-05	Biological Process
2520	regulation of catabolic process	956	19	2.22	0.0431	Biological Process
2523	negative regulation of biological process	5187	103	2.22	3.59e-15	Biological Process
2524	negative regulation of cellular process	4785	95	2.22	1.11e-13	Biological Process
2525	neurogenesis	1361	27	2.22	0.00717	Biological Process
2529	cell differentiation	3403	67	2.2	2.05e-08	Biological Process
2531	cellular developmental process	3463	68	2.2	1.53e-08	Biological Process
2545	regulation of localization	2709	53	2.19	4.69e-06	Biological Process
2546	regulation of signal transduction	2867	56	2.19	1.67e-06	Biological Process
2549	response to chemical	4055	79	2.18	3.84e-10	Biological Process
2559	positive regulation of molecular function	1497	29	2.17	0.00501	Biological Process
2578	developmental process	5565	107	2.15	3.96e-15	Biological Process
2581	positive regulation of signal transduction	1460	28	2.15	0.00729	Biological Process
2583	response to external stimulus	2406	46	2.14	6.68e-05	Biological Process
2587	regulation of immune system process	1418	27	2.13	0.0101	Biological Process
2594	positive regulation of signaling	1639	31	2.12	0.0052	Biological Process
2601	regulation of phosphate metabolic process	1379	26	2.11	0.0144	Biological Process
2602	regulation of phosphorus metabolic process	1379	26	2.11	0.0143	Biological Process
2603	nervous system development	2193	41	2.09	0.000444	Biological Process
2609	regulation of response to stimulus	3805	71	2.09	4.17e-08	Biological Process
2620	cell development	1623	30	2.07	0.0083	Biological Process
2626	positive regulation of cell communication	1632	30	2.06	0.00881	Biological Process
2628	positive regulation of cellular protein metabolic process	1366	25	2.05	0.0329	Biological Process
2630	negative regulation of macromolecule metabolic process	2737	50	2.04	5.71e-05	Biological Process
2643	regulation of signaling	3257	59	2.03	5.65e-06	Biological Process
2648	negative regulation of nitrogen compound metabolic process	2380	43	2.02	0.000555	Biological Process
2656	regulation of cell communication	3242	58	2	1.39e-05	Biological Process
2679	multicellular organismal process	6584	117	1.99	5.67e-15	Biological Process
2688	negative regulation of metabolic process	2952	52	1.97	0.000115	Biological Process
2709	negative regulation of cellular metabolic process	2546	44	1.93	0.00104	Biological Process
2781	response to stimulus	8039	130	1.81	1.13e-14	Biological Process
2783	positive regulation of biological process	6062	98	1.81	5.17e-09	Biological Process
2812	cellular component organization	5298	83	1.75	3.12e-06	Biological Process
2824	positive regulation of cellular process	5580	86	1.73	2.18e-06	Biological Process
2854	cellular component organization or biogenesis	5496	83	1.69	1.06e-05	Biological Process
2879	localization	5081	75	1.65	0.000157	Biological Process
2889	cellular response to stimulus	6392	93	1.63	6.5e-06	Biological Process
2917	positive regulation of metabolic process	3675	52	1.58	0.0203	Biological Process
2926	regulation of primary metabolic process	5707	80	1.57	0.000485	Biological Process
2928	organonitrogen compound metabolic process	4787	67	1.57	0.00408	Biological Process
2944	regulation of macromolecule metabolic process	6083	84	1.55	0.000354	Biological Process
2949	regulation of nitrogen compound metabolic process	5537	76	1.54	0.00167	Biological Process
2960	regulation of metabolic process	6586	89	1.51	0.000382	Biological Process
2973	regulation of cellular metabolic process	5928	80	1.51	0.00168	Biological Process
3002	regulation of biological process	11528	151	1.47	6.07e-11	Biological Process
3039	regulation of cellular process	11076	140	1.41	1.1e-07	Biological Process
3043	biological regulation	12249	154	1.41	7.16e-10	Biological Process
3147	cellular process	15074	168	1.25	2.3e-07	Biological Process
3214	biological_process	17698	183	1.16	1.18e-08	Biological Process
21	procollagen-lysine 5-dioxygenase activity	3	2	74.62	0.0411	Molecular Function
22	platelet-derived growth factor binding	11	7	71.23	2.48e-08	Molecular Function
23	heparan sulfate binding	6	3	55.96	0.00456	Molecular Function
59	protein disulfide isomerase activity	20	6	33.58	1.23e-05	Molecular Function
60	intramolecular oxidoreductase activity, transposing S-S bonds	20	6	33.58	1.2e-05	Molecular Function
62	protein-disulfide reductase (NAD(P)) activity	11	3	30.53	0.0159	Molecular Function
63	extracellular matrix structural constituent conferring tensile strength	41	11	30.03	3.48e-10	Molecular Function
64	virion binding	12	3	27.98	0.019	Molecular Function
75	structural constituent of postsynapse	13	3	25.83	0.0229	Molecular Function
76	phospholipase inhibitor activity	13	3	25.83	0.0226	Molecular Function
77	extracellular matrix structural constituent conferring compression resistance	22	5	25.44	0.000361	Molecular Function
78	lipase inhibitor activity	18	4	24.87	0.00335	Molecular Function
81	oxidoreductase activity, acting on a sulfur group of donors, NAD(P) as acceptor	14	3	23.98	0.0262	Molecular Function
82	protein-disulfide reductase activity	38	8	23.56	1.03e-06	Molecular Function
93	intermediate filament binding	15	3	22.39	0.0301	Molecular Function
94	structural constituent of skin epidermis	15	3	22.39	0.0297	Molecular Function
95	extracellular matrix binding	56	11	21.99	4.17e-09	Molecular Function
96	complement binding	21	4	21.32	0.00529	Molecular Function
97	metalloendopeptidase inhibitor activity	16	3	20.99	0.0334	Molecular Function
98	disulfide oxidoreductase activity	43	8	20.82	2.35e-06	Molecular Function
103	insulin-like growth factor binding	29	5	19.3	0.00116	Molecular Function
104	lipoprotein particle receptor binding	29	5	19.3	0.00114	Molecular Function
105	extracellular matrix structural constituent	173	29	18.76	3.97e-23	Molecular Function
115	low-density lipoprotein particle receptor binding	24	4	18.65	0.00775	Molecular Function
1181	cadherin binding involved in cell-cell adhesion	18	3	18.65	0.0428	Molecular Function
119	proteoglycan binding	37	6	18.15	0.000219	Molecular Function
1231	MHC class II protein complex binding	27	4	16.58	0.0115	Molecular Function
1241	fibronectin binding	28	4	15.99	0.0126	Molecular Function
1251	laminin binding	28	4	15.99	0.0125	Molecular Function
129	collagen binding	70	10	15.99	3.89e-07	Molecular Function
1302	oxidoreductase activity, acting on a sulfur group of donors	59	8	15.18	1.7e-05	Molecular Function
1311	intramolecular oxidoreductase activity	52	7	15.07	0.000102	Molecular Function
133	integrin binding	147	19	14.47	2.91e-13	Molecular Function
134	serine-type endopeptidase inhibitor activity	101	13	14.41	6.52e-09	Molecular Function
135	fatty acid binding	39	5	14.35	0.00362	Molecular Function
144	endopeptidase inhibitor activity	183	21	12.84	1.05e-13	Molecular Function
151	MHC protein complex binding	36	4	12.44	0.0259	Molecular Function
157	peptidase inhibitor activity	190	21	12.37	1.8e-13	Molecular Function
158	endopeptidase regulator activity	197	21	11.93	3.07e-13	Molecular Function
159	growth factor binding	142	15	11.82	2.9e-09	Molecular Function
162	protease binding	136	14	11.52	1.62e-08	Molecular Function
170	protein folding chaperone	40	4	11.19	0.034	Molecular Function
173	peptidase regulator activity	233	23	11.05	8.59e-14	Molecular Function
174	structural constituent of cytoskeleton	104	10	10.76	1.02e-05	Molecular Function
175	peroxidase activity	53	5	10.56	0.0118	Molecular Function
177	antioxidant activity	88	8	10.18	0.00023	Molecular Function
1841	oxidoreductase activity, acting on peroxide as acceptor	57	5	9.82	0.0155	Molecular Function
187	glycosaminoglycan binding	234	20	9.57	6e-11	Molecular Function
1941	phosphatidylserine binding	60	5	9.33	0.0185	Molecular Function
1953	heparin binding	169	14	9.27	1.77e-07	Molecular Function
1961	chaperone binding	109	9	9.24	0.000122	Molecular Function
197	monocarboxylic acid binding	73	6	9.2	0.00578	Molecular Function
205	cell adhesion molecule binding	537	41	8.55	4.3e-22	Molecular Function
216	actin filament binding	220	15	7.63	5.01e-07	Molecular Function
217	cadherin binding	323	22	7.62	2.24e-10	Molecular Function
219	unfolded protein binding	122	8	7.34	0.00194	Molecular Function
220	isomerase activity	170	11	7.24	7.89e-05	Molecular Function
221	sulfur compound binding	267	17	7.13	1.27e-07	Molecular Function
222	structural molecule activity	710	45	7.09	1.23e-21	Molecular Function
242	actin binding	453	24	5.93	2.02e-09	Molecular Function
257	carboxylic acid binding	175	8	5.12	0.0158	Molecular Function
264	calcium ion binding	730	31	4.75	4.14e-10	Molecular Function
273	carbohydrate binding	275	11	4.48	0.0043	Molecular Function
2811	protein-containing complex binding	1317	50	4.25	2.77e-15	Molecular Function
295	ubiquitin protein ligase binding	300	10	3.73	0.0277	Molecular Function
306	cytoskeletal protein binding	1003	32	3.57	1.16e-07	Molecular Function
307	ubiquitin-like protein ligase binding	319	10	3.51	0.0395	Molecular Function
320	enzyme regulator activity	1254	36	3.21	1.29e-07	Molecular Function
323	phospholipid binding	467	13	3.12	0.0231	Molecular Function
329	oxidoreductase activity	743	20	3.01	0.00141	Molecular Function
332	signaling receptor binding	1588	42	2.96	4.6e-08	Molecular Function
333	lipid binding	799	21	2.94	0.00123	Molecular Function
338	enzyme binding	2062	52	2.82	1.44e-09	Molecular Function
339	identical protein binding	2105	53	2.82	9.48e-10	Molecular Function
350	protein homodimerization activity	692	16	2.59	0.033	Molecular Function
361	molecular function regulator	1977	43	2.43	7.07e-06	Molecular Function
365	RNA binding	1685	36	2.39	0.000123	Molecular Function
371	protein dimerization activity	1040	21	2.26	0.0312	Molecular Function
377	carbohydrate derivative binding	2275	45	2.21	4.44e-05	Molecular Function
4211	metal ion binding	4278	63	1.65	0.00213	Molecular Function
425	cation binding	4369	64	1.64	0.00233	Molecular Function
4341	ion binding	6072	85	1.57	0.00022	Molecular Function
460	protein binding	14349	167	1.3	3.3e-09	Molecular Function
472	binding	16519	174	1.18	8.95e-06	Molecular Function
480	molecular_function	18250	182	1.12	1.63e-05	Molecular Function
566	DNA-binding transcription factor activity, RNA polymerase II-specific	1390	2	0.16	0.0305	Molecular Function
567	DNA-binding transcription factor activity	1443	2	0.16	0.0228	Molecular Function
568	molecular transducer activity	1612	2	0.14	0.0061	Molecular Function
5691	signaling receptor activity	1612	2	0.14	0.00601	Molecular Function
571	transmembrane signaling receptor activity	1390	1	0.08	0.00609	Molecular Function
3898	G protein-coupled receptor activity	882	0	NA	0.0358	Molecular Function
11	collagen type I trimer	2	2	100	0.00813	Cellular Component
19	muscle thin filament tropomyosin	4	3	83.95	0.000514	Cellular Component
20	collagen type VI trimer	3	2	74.62	0.0125	Cellular Component
211	fibrillar collagen trimer	12	8	74.62	1.55e-10	Cellular Component
225	collagen beaded filament	3	2	74.62	0.0124	Cellular Component
233	banded collagen fibril	12	8	74.62	1.51e-10	Cellular Component
24	intermediate-density lipoprotein particle	6	3	55.96	0.00117	Cellular Component
25	endoplasmic reticulum chaperone complex	10	5	55.96	4.03e-06	Cellular Component
30	collagen type V trimer	4	2	55.96	0.0173	Cellular Component
35	complex of collagen trimers	21	10	53.3	3.95e-12	Cellular Component
36	endocytic vesicle lumen	22	9	45.79	1.86e-10	Cellular Component
37	fibrinogen complex	8	3	41.97	0.00213	Cellular Component
38	platelet dense granule lumen	14	5	39.97	1.36e-05	Cellular Component
391	dense body	6	2	37.31	0.0304	Cellular Component
41	cortical granule	6	2	37.31	0.0301	Cellular Component
48	extrinsic component of external side of plasma membrane	9	3	37.31	0.00276	Cellular Component
491	MHC class I peptide loading complex	9	3	37.31	0.00273	Cellular Component
501	fascia adherens	10	3	33.58	0.0034	Cellular Component
511	sarcoplasmic reticulum lumen	10	3	33.58	0.00337	Cellular Component
521	collagen type IV trimer	7	2	31.98	0.038	Cellular Component
57	collagen network	8	2	27.98	0.0462	Cellular Component
58	network-forming collagen trimer	8	2	27.98	0.0459	Cellular Component
641	platelet alpha granule lumen	67	16	26.73	1.41e-15	Cellular Component
65	platelet dense granule	21	5	26.65	7.07e-05	Cellular Component
66	chylomicron	13	3	25.83	0.00629	Cellular Component
772	platelet alpha granule	91	18	22.14	2.56e-16	Cellular Component
781	triglyceride-rich plasma lipoprotein particle	21	4	21.32	0.00136	Cellular Component
79	blood microparticle	143	27	21.13	2.94e-24	Cellular Component
811	striated muscle thin filament	23	4	19.47	0.00182	Cellular Component
91	pseudopodium	18	3	18.65	0.0129	Cellular Component
92	melanosome	110	18	18.32	4.45e-15	Cellular Component
931	tertiary granule lumen	55	9	18.32	1.62e-07	Cellular Component
941	pigment granule	110	18	18.32	4.33e-15	Cellular Component
951	collagen trimer	89	14	17.61	1.66e-11	Cellular Component
961	basement membrane	97	15	17.31	3.11e-12	Cellular Component
100	endoplasmic reticulum lumen	313	48	17.16	1.52e-40	Cellular Component
101	very-low-density lipoprotein particle	20	3	16.79	0.0164	Cellular Component
1021	myofilament	27	4	16.58	0.00297	Cellular Component
1031	smooth endoplasmic reticulum	34	5	16.46	0.000519	Cellular Component
1044	ficolin-1-rich granule lumen	124	18	16.25	2.72e-14	Cellular Component
1051	collagen-containing extracellular matrix	426	61	16.03	5.71e-51	Cellular Component
108	high-density lipoprotein particle	28	4	15.99	0.0033	Cellular Component
109	vesicle lumen	326	46	15.79	2.81e-37	Cellular Component
110	secretory granule lumen	321	45	15.69	2.55e-36	Cellular Component
111	cytoplasmic vesicle lumen	324	45	15.55	3.43e-36	Cellular Component
112	lysosomal lumen	97	13	15	6.57e-10	Cellular Component
113	specific granule lumen	62	8	14.44	5.29e-06	Cellular Component
114	actin filament bundle	80	10	13.99	2.23e-07	Cellular Component
122	contractile actin filament bundle	72	9	13.99	1.21e-06	Cellular Component
1242	stress fiber	72	9	13.99	1.19e-06	Cellular Component
1253	endosome lumen	35	4	12.79	0.00682	Cellular Component
132	extracellular matrix	570	63	12.37	1.49e-46	Cellular Component
1331	external encapsulating structure	571	63	12.35	1.48e-46	Cellular Component
1341	actomyosin	82	9	12.28	3.28e-06	Cellular Component
1351	lipoprotein particle	37	4	12.1	0.00813	Cellular Component
136	plasma lipoprotein particle	37	4	12.1	0.00806	Cellular Component
137	cortical actin cytoskeleton	93	10	12.04	8.09e-07	Cellular Component
138	cortical cytoskeleton	122	13	11.93	8.45e-09	Cellular Component
139	ficolin-1-rich granule	185	19	11.5	1.2e-12	Cellular Component
141	protein-lipid complex	40	4	11.19	0.0103	Cellular Component
145	podosome	30	3	11.19	0.0426	Cellular Component
146	vacuolar lumen	173	17	11	4.94e-11	Cellular Component
1511	cornified envelope	45	4	9.95	0.0146	Cellular Component
153	actin filament	118	10	9.49	5.73e-06	Cellular Component
156	Golgi lumen	102	8	8.78	0.000142	Cellular Component
1591	focal adhesion	419	32	8.55	5.36e-18	Cellular Component
160	cell-substrate junction	426	32	8.41	7.23e-18	Cellular Component
164	secretory granule	869	60	7.73	2.06e-33	Cellular Component
165	endoplasmic reticulum-Golgi intermediate compartment	133	9	7.57	0.000118	Cellular Component
166	tertiary granule	164	11	7.51	1.22e-05	Cellular Component
1731	myofibril	233	15	7.21	1.95e-07	Cellular Component
1741	endoplasmic reticulum protein-containing complex	126	8	7.11	0.000571	Cellular Component
1751	sarcoplasm	79	5	7.08	0.0144	Cellular Component
1771	contractile fiber	241	15	6.97	2.91e-07	Cellular Component
178	cell cortex	322	20	6.95	1.11e-09	Cellular Component
179	rough endoplasmic reticulum	84	5	6.66	0.0177	Cellular Component
1821	secretory vesicle	1037	61	6.58	2.25e-30	Cellular Component
186	extracellular exosome	2098	123	6.56	3.03e-72	Cellular Component
1871	extracellular vesicle	2118	124	6.55	1.05e-72	Cellular Component
188	extracellular organelle	2120	124	6.55	8.75e-73	Cellular Component
189	extracellular membrane-bounded organelle	2120	124	6.55	7e-73	Cellular Component
191	sarcomere	212	12	6.34	1.95e-05	Cellular Component
1931	specific granule	160	9	6.3	0.00046	Cellular Component
1942	azurophil granule lumen	90	5	6.22	0.0231	Cellular Component
1955	ruffle	180	10	6.22	0.000178	Cellular Component
202	azurophil granule	154	8	5.81	0.00204	Cellular Component
203	primary lysosome	154	8	5.81	0.00202	Cellular Component
2051	phagocytic vesicle	138	7	5.68	0.00574	Cellular Component
206	sarcolemma	139	7	5.64	0.00593	Cellular Component
215	extracellular space	3392	157	5.18	4.8e-89	Cellular Component
2161	brush border	109	5	5.13	0.047	Cellular Component
2221	anchoring junction	836	37	4.95	7.3e-14	Cellular Component
223	lamellipodium	205	9	4.91	0.0025	Cellular Component
224	supramolecular polymer	1017	44	4.84	2.55e-16	Cellular Component
226	actin cytoskeleton	516	22	4.77	8.72e-08	Cellular Component
227	I band	142	6	4.73	0.0301	Cellular Component
230	supramolecular fiber	1009	42	4.66	5.22e-15	Cellular Component
231	endocytic vesicle	337	14	4.65	7.54e-05	Cellular Component
232	adherens junction	171	7	4.58	0.0163	Cellular Component
235	cell leading edge	428	17	4.45	1.24e-05	Cellular Component
240	growth cone	182	7	4.3	0.0223	Cellular Component
244	extracellular region	4373	164	4.2	9.76e-83	Cellular Component
246	lytic vacuole	725	27	4.17	2.15e-08	Cellular Component
247	lysosome	725	27	4.17	2.11e-08	Cellular Component
248	site of polarized growth	188	7	4.17	0.0263	Cellular Component
254	cell surface	931	33	3.97	7.91e-10	Cellular Component
256	intermediate filament	229	8	3.91	0.019	Cellular Component
2571	vesicle	3932	137	3.9	3.81e-56	Cellular Component
261	cytoplasmic vesicle	2455	84	3.83	1.81e-27	Cellular Component
262	intracellular vesicle	2458	84	3.83	1.87e-27	Cellular Component
263	vacuole	823	28	3.81	6.79e-08	Cellular Component
265	distal axon	301	10	3.72	0.00809	Cellular Component
269	supramolecular complex	1343	44	3.67	3.06e-12	Cellular Component
2801	endoplasmic reticulum	2008	60	3.34	1.47e-15	Cellular Component
2813	intermediate filament cytoskeleton	270	8	3.32	0.0467	Cellular Component
287	perinuclear region of cytoplasm	751	21	3.13	0.000121	Cellular Component
2951	cell-cell junction	496	13	2.93	0.0105	Cellular Component
298	polymeric cytoskeletal fiber	777	20	2.88	0.000606	Cellular Component
299	external side of plasma membrane	442	11	2.79	0.0345	Cellular Component
302	endomembrane system	4663	115	2.76	1.75e-28	Cellular Component
309	cell junction	2103	49	2.61	1.22e-08	Cellular Component
316	axon	661	15	2.54	0.0162	Cellular Component
319	side of membrane	662	15	2.54	0.0163	Cellular Component
3381	organelle lumen	5541	109	2.2	7.36e-18	Cellular Component
3391	intracellular organelle lumen	5541	109	2.2	7.06e-18	Cellular Component
340	membrane-enclosed lumen	5541	109	2.2	6.79e-18	Cellular Component
343	cytoskeleton	2355	45	2.14	2.65e-05	Cellular Component
345	endosome	997	19	2.13	0.0382	Cellular Component
3481	cell periphery	6364	117	2.06	1.22e-17	Cellular Component
353	Golgi apparatus	1599	28	1.96	0.0123	Cellular Component
354	plasma membrane bounded cell projection	2257	39	1.93	0.00149	Cellular Component
357	cell projection	2362	39	1.85	0.0032	Cellular Component
372	cytosol	5394	81	1.68	5.61e-06	Cellular Component
378	cytoplasm	11940	172	1.61	2.76e-25	Cellular Component
393	membrane-bounded organelle	13085	170	1.45	1.69e-17	Cellular Component
401	intracellular membrane-bounded organelle	12029	154	1.43	1.19e-11	Cellular Component
404	intracellular organelle	13115	167	1.43	3.39e-15	Cellular Component
405	organelle	13912	177	1.42	8.44e-20	Cellular Component
408	plasma membrane	5867	74	1.41	0.0121	Cellular Component
4212	intracellular anatomical structure	14830	174	1.31	4.31e-13	Cellular Component
447	cellular anatomical entity	18715	184	1.1	1.18e-06	Cellular Component
448	cellular_component	18866	184	1.09	6.25e-06	Cellular Component
492	nuclear lumen	4419	21	0.53	0.00944	Cellular Component
5001	nucleoplasm	4069	16	0.44	0.00117	Cellular Component
504	intrinsic component of membrane	5947	20	0.38	1.93e-07	Cellular Component
508	integral component of membrane	5787	17	0.33	1.76e-08	Cellular Component
