# Supplementary material for: Human Wharton’s Jelly Mesenchymal Stem Cells Secretome Inhibits Human SARS-CoV-2 and Avian Infectious Bronchitis Coronaviruses
Source: Cells. 2022 Apr 21;11(9):1408. doi: 10.3390/cells11091408 (PMC9101656; doi:10.3390/cells11091408)
Supplement: Supplementary file 1 [file cells-11-01408-s001.zip › Table S4.xlsx]

## Sheet: pathway enrichment analysis
	Term	Overlap	P.value	Adjusted.P.value	Old.P.value	Old.Adjusted.P.value	Odds.Ratio	Combined.Score	Genes	source
1	SARS coronavirus nsp7-pp1a/pp1ab (gene: orf1ab) from Virus-Host PPI P-HIPSTer 2020	12997	6.74e-10	7.73e-09	0	0	34.2976	724.303	APP;HSPA8;HSPA5;YWHAB;FN1;MSN;B2M;YWHAZ	COVID 19
2	Genes whose expression is altered by SARS-COV-2 infection	24/118	4.83e-26	2.63e-24	0	0	32.4947	1894.2	HSP90AA1;TPI1;ANXA2;IGFBP4;SERPINE1;ENO1;ACTN4;EEF2;YWHAZ;ACTB;ACTG1;EEF1A1;MYL6;LDHA;PKM;TMSB4X;CFL1;PGK1;CALR;P4HB;VIM;PFN1;PPIA;GAPDH	COVID 19
3	SARS coronavirus RNA-dependent RNA polymerase (gene: orf1ab) from Virus-Host PPI P-HIPSTer 2020	44601	0.00275155	0.00816105	0	0	31.9839	188.564	YWHAB;YWHAZ	COVID 19
4	SARS coronavirus nucleocapsid protein (gene: N) from Virus-Host PPI P-HIPSTer 2020	44741	1.89e-07	1.59e-06	0	0	29.8537	462.152	TUBA1C;YWHAB;FN1;B2M;YWHAZ;TUBA8	COVID 19
5	SARS coronavirus formerly known as growth-factor-like protein (gene: orf1ab) from Virus-Host PPI P-HIPSTer 2020	44636	0.000362	0.00137368	0	0	25.972	205.776	APP;YWHAB;YWHAZ	COVID 19
6	SARS coronavirus hypothetical protein sars9b from Virus-Host PPI P-HIPSTer 2020	44636	0.000362	0.00137368	0	0	25.972	205.776	YWHAB;YWHAZ;B2M	COVID 19
7	500 genes up-regulated by MHV-A59 in murine spleen cells from GSE146074 5d	51/381	1.37e-45	2.99e-43	0	0	23.5332	2430.99	LGALS3BP;SPARC;CTSZ;ENO1;ACTB;ACTG1;TUBA1C;LGALS1;LAMP1;CFL1;COTL1;B2M;CTSB;PDIA3;HSP90AA1;TPI1;ANXA2;PGAM1;ANXA5;BGN;NME2;ACTN4;PDIA6;PDIA4;PKM;COL4A1;PFN1;PPIB;MFGE8;PPIA;GAPDH;GRN;GSTP1;HSP90B1;C3;CST3;LDHA;PRDX1;PSAP;PGK1;IGFBP7;S100A11;TXNDC5;HSPA8;HSPA5;MDH2;HSPE1;TGFBI;CALR;VIM;P4HB	COVID 19
8	ACE2 Pathway from BioCarta 2013	44604	0.00495624	0.0138521	0	0	22.3853	118.801	COL4A2;COL4A1	COVID 19
9	Genes whose expression is altered by MHV infection	28825	4.74e-12	6.88e-11	0	0	21.5079	560.838	EEF1A1;HSPA8;AHSG;TMSB4X;PSAP;ALB;APOA1;GC;EEF2;B2M;ACTB;ACTG1	COVID 19
10	500 genes down-regulated by SARS-CoV-2 (0.2 MOI) in human A549 cells transduced with ACE2 vector from GSE147507	58/494	8.32e-49	3.63e-46	0	0	21.3119	2359.39	APP;SERPINE1;PEBP1;ENO1;PLOD1;ACTB;LOXL2;LASP1;LGALS1;CFL1;COTL1;TIMP2;ANXA6;ANXA1;TPI1;ANXA2;ACTN1;TPM1;ACTN4;HSPG2;PDIA6;DKK3;NME1;EEF1A1;MYL6;VCAN;PKM;COL4A2;COL4A1;COL6A1;FSCN1;MYH9;PFN1;MFGE8;ALDOA;VCL;CD44;TAGLN;GSTP1;THBS1;PRDX1;GPC1;PSAP;PGK1;FLNA;IGFBP7;CD59;IGFBP6;S100A11;CPA4;MDH1;MDH2;TXNRD1;MSN;COL5A2;CALR;VIM;FBN1	COVID 19
11	SARS coronavirus nsp9-pp1a/pp1ab (gene: orf1ab) from Virus-Host PPI P-HIPSTer 2020	44605	0.00582307	0.0159677	0	0	20.3493	104.716	APP;HSPA5	COVID 19
12	500 genes up-regulated by MHV-A59 in murine liver cells from GSE146074 3d	48/418	1.42e-39	2.06e-37	0	0	19.2624	1723.09	LGALS3BP;ITIH4;ITIH3;GRN;SPARC;YWHAB;GSTP1;CTSZ;CXCL1;PLOD1;ACTB;ACTG1;HSP90B1;C3;LASP1;ARHGDIA;TMSB4X;CFL1;PSAP;COTL1;FLNA;QSOX1;B2M;TMSB10;S100A11;CTSB;PDIA3;HSP90AA1;TPM4;HSPA5;ANXA2;TPM3;TXNRD1;ANXA5;MSN;ACTN4;PDIA6;YWHAZ;PDIA4;COL3A1;PKM;COL4A2;COL4A1;MYH9;TGFBI;CALR;VIM;PFN1	COVID 19
13	SARS perturbation; 280 Up Genes from GEN3VA; Human PBMCs; Accession: GDS1028 Platform: GPL201	32/269	8.79e-27	5.48e-25	0	0	17.9881	1079.21	GRN;SPARC;HBB;ENO1;TXN;ACTG1;HSP90B1;CST3;LGALS1;LAMP1;BASP1;CFL1;COTL1;TIMP1;B2M;TMSB10;S100A11;CTSB;ANXA1;TPI1;ANXA2;ACTN1;PGAM1;MYL6;VCAN;PKM;VIM;PFN1;ALDOA;GAPDH;VCL;LTF	COVID 19
14	SARS coronavirus hypothetical protein sars7a from Virus-Host PPI P-HIPSTer 2020	13636	1.88e-05	0.000104	0	0	17.7703	193.404	DAAM1;YWHAB;FN1;B2M;YWHAZ	COVID 19
15	SARS Perturbation; 276 Up Genes from GEN3VA Mouse Lung; Accession: GSE19137 Platform: GPL1261 Entry 4	31/266	1.11e-25	5.37e-24	0	0	17.4573	1003.12	GRN;SPARC;YWHAB;GSTP1;HSPB1;ACTB;ACTG1;C3;CST3;LASP1;BASP1;ARHGDIA;CFL1;PSAP;IGFBP7;B2M;HSPA8;ANXA2;TPM3;MDH2;ANXA5;BGN;EEF2;COL3A1;COL4A2;COL4A1;COL6A1;TGFBI;CALR;VIM;MFGE8	COVID 19
16	500 genes up-regulated by MHV-A59 in murine spleen cells from GSE146074 3d	43/421	3.55e-33	3.87e-31	0	0	16.263	1215.14	GRN;SPARC;CTSZ;ENO1;ACTB;ACTG1;HSP90B1;C3;CST3;LDHA;LAMP1;CFL1;PSAP;PGK1;B2M;CTSB;PDIA3;HSPA8;HSP90AA1;TPM4;HSPA5;TPM3;MDH2;BGN;NME2;MSN;HSPE1;PDIA6;YWHAZ;PDIA4;COL1A1;COL3A1;PKM;COL4A1;TGFBI;CALR;VIM;P4HB;PFN1;PPIB;MFGE8;PPIA;GAPDH	COVID 19
17	COVID19-Nsp9 protein host PPI from Krogan	44608	0.00880227	0.0231192	0	0	15.9863	75.659	FBN2;FBN1	COVID 19
18	SARS coronavirus nsp4-pp1a/pp1ab (gene: orf1ab) from Virus-Host PPI P-HIPSTer 2020	44608	0.00880227	0.0231192	0	0	15.9863	75.659	YWHAB;YWHAZ	COVID 19
19	500 genes up-regulated by MHV-A59 in murine liver cells from GSE146074 5d	40/394	1e-30	8.74e-29	0	0	15.8249	1093.1	LGALS3BP;ITIH3;GRN;SPARC;GSTP1;CTSZ;CXCL1;ACTB;ACTG1;LGALS1;ARHGDIA;TMSB4X;CFL1;PSAP;COTL1;FLNA;IGFBP7;TIMP1;B2M;TMSB10;S100A11;CTSB;HSP90AA1;TPM4;HSPA5;ANXA2;TPM3;ANXA5;BGN;MSN;YWHAZ;COL3A1;COL1A2;PKM;COL4A2;COL4A1;MYH9;TGFBI;VIM;PFN1	COVID 19
20	SARS coronavirus nsp8-pp1a/pp1ab (gene: orf1ab) from Virus-Host PPI P-HIPSTer 2020	15827	3.97e-05	0.000201	0	0	14.9599	151.614	APP;TPM4;TPM3;FN1;MSN	COVID 19
21	SARS Perturbation; Up Genes from GEN3VA Mouse Lung; Accession: GSE19137 Platform: GPL1261 Entry 3	33/350	2.55e-24	1.01e-22	0	0	13.9067	755.498	GRN;GSTP1;PEBP1;HSPB1;TXN;ACTB;ACTG1;C3;CST3;LAMP1;ARHGDIA;CFL1;PSAP;IGFBP7;B2M;HSPA8;HSP90AA1;HSPA5;ANXA2;TPM3;MDH2;ANXA5;NME2;NME1;ACTA1;COL4A2;COL4A1;ALB;MYH9;CALR;VIM;PPIB;MFGE8	COVID 19
22	500 top upregulated genes from SARS-CoV-2 infection at 72 HPI from GSE157852	39/440	1.05e-27	7.6e-26	0	0	13.4909	838.127	FBN2;TAGLN;YWHAB;SERPINE1;TXN;THBS1;FSTL1;ACTB;ACTG1;TUBA1C;CDH2;CALD1;COTL1;A2M;TMSB10;S100A11;CTHRC1;ANXA1;TPM4;ANXA2;TPM3;ACTN1;TPM1;ANXA5;FN1;MSN;ACTN4;NME1;COL1A1;MYL6;VCAN;COL4A1;COL5A2;MYH9;VIM;PFN1;MFGE8;VCL;CD44	COVID 19
23	SARS coronavirus E2 glycoprotein precursor (gene: S) from Virus-Host PPI P-HIPSTer 2020	25385	2.76e-06	1.98e-05	0	0	12.9701	165.999	APP;HSP90AA1;YWHAB;FN1;MSN;B2M;YWHAZ	COVID 19
24	SARS Perturbation; 291 Up Genes from GEN3VA Mouse Lung; Accession: GSE19137 Platform: GPL1261 Entry 5	25/274	3.11e-18	7.97e-17	0	0	12.7601	514.388	GRN;SPARC;YWHAB;GSTP1;PEBP1;ACTB;ACTG1;LASP1;BASP1;ARHGDIA;CFL1;PSAP;B2M;ANXA2;TPM3;BGN;MSN;EEF2;YWHAZ;EEF1A1;FSCN1;MYH9;TGFBI;VIM;MFGE8	COVID 19
25	SARS Perturbation; 348 Up Genes from GEN3VA Mouse Lung; Accession: GSE19137 Platform: GPL1261 Entry 6	29/330	1.42e-20	4.75e-19	0	0	12.5378	573.028	GRN;SPARC;GSTP1;PEBP1;HSPB1;TXN;ACTB;ACTG1;CST3;LAMP1;ARHGDIA;CFL1;PSAP;IGFBP7;B2M;HSPA8;HSP90AA1;HSPA5;ANXA2;IGFBP4;MDH2;ANXA5;NME2;NME1;ALB;MYH9;CALR;VIM;MFGE8	COVID 19
26	SARS coronavirus leader protein (gene: orf1ab) from Virus-Host PPI P-HIPSTer 2020	44612	0.0136145	0.0327951	0	0	12.4313	53.4124	YWHAB;YWHAZ	COVID 19
27	Gr5vs Gr 4	31260	9.42e-07	7.6e-06	0	0	11.9961	166.452	C3;VNN1;SERPINE2;KRT2;KRT1;KRT10;TGFBI;KRT9	COVID 19
28	SARS Perturbation; 254 Up Genes from GEN3VA Mouse Lung; Accession: GSE19137 Platform: GPL1261 Entry 2	21/243	5.4e-15	1.12e-13	0	0	11.7339	385.487	LGALS3BP;GRN;SPARC;TPM3;GSTP1;ANXA5;NME2;MSN;HSPB1;TXN;EEF2;ACTB;ACTG1;EEF1A1;LDHA;COL4A2;BASP1;ARHGDIA;PFN1;B2M;PPIA	COVID 19
29	500 genes down-regulated by SARS-CoV-2 (2 MOI) in human A549 cells transduced with ACE2 vector from GSE147507	38/492	8.1e-25	3.53e-23	0	0	11.4966	637.747	GSTP1;PEBP1;ENO1;PLOD1;TXN;UCHL1;LGALS1;LAMP1;PRDX1;APOH;GPC1;PSAP;PGK1;ANXA6;FLNA;IGFBP7;IGFBP6;CPA4;ANXA1;TPI1;ANXA2;MDH1;MDH2;TXNRD1;ACTN4;HSPG2;PDIA6;PDIA4;NME1;EEF1A1;VCAN;COL4A2;FSCN1;CALU;CALR;PFN1;MFGE8;CD44	COVID 19
30	SARS perturbation; 264 Down Genes from GEN3VA; Human airway epithelium (HAE) cells; Accession: GSE47961 Platform: GPL6480; Entry 2	19/224	1.6e-13	2.8e-12	0	0	11.3629	334.77	ECM1;TAGLN;SPARC;SERPINE2;MMP2;COL12A1;FN1;THBS2;LOXL2;COL1A1;VCAN;COL3A1;LGALS1;COL1A2;COL4A2;CALD1;COL5A2;SPOCK1;VIM	COVID 19
31	500 genes down-regulated by MERS-CoV in Calu-3 cells from GSE139516 24h	36/476	3.33e-23	1.21e-21	0	0	11.0889	573.932	APP;GRN;GSTP1;PLOD1;ACTB;ACTG1;C3;TUBA1C;MYDGF;LASP1;LGALS1;PRDX1;GPC1;CFL1;COTL1;PGK1;TIMP2;QSOX1;CD59;TIMP1;B2M;TMSB10;S100A11;HSP90AA1;TPI1;TPM4;ANXA2;MDH2;PRDX6;MYL6;NUCB1;CALR;ALDOA;PPIA;GAPDH;CD44	COVID 19
32	Top 500 upregulated genes in human nasal epithelial cells with SARS-CoV-2 infection (WT, 8 hpi) from GEO GSE162131	32/452	8.43e-20	2.45e-18	0	0	10.0556	441.645	ENO1;ACTB;ACTG1;HSP90B1;TUBA1C;MT2A;LDHA;ARHGDIA;GPC1;CFL1;COTL1;FLNA;IGFBP6;TIMP1;TMSB10;CPA4;PDIA3;ANXA1;TPM4;ANXA2;TPM3;ACTN1;PGAM1;TPM1;MSN;ACTN4;YWHAZ;NME1;PKM;FSCN1;PFN1;CD44	COVID 19
33	Top 500 upregulated genes in human nasal epithelial cells with SARS-CoV-2 infection (Mutant, 8 hpi) from GEO GSE162131	32/454	9.61e-20	2.62e-18	0	0	10.0069	438.188	ECM1;ENO1;ACTB;ACTG1;HSP90B1;TUBA1C;MT2A;LDHA;ARHGDIA;GPC1;CFL1;COTL1;FLNA;IGFBP6;TIMP1;TMSB10;CPA4;PDIA3;ANXA1;TPM4;ANXA2;TPM3;ACTN1;PGAM1;TPM1;MSN;YWHAZ;NME1;PKM;FSCN1;PFN1;CD44	COVID 19
34	SARS Perturbation 180 Down Genes from GEN3VA Mouse Lung; Accession: GSE19137 Platform: GPL1261 Entry 1	13/170	4.47e-09	4.64e-08	0	0	9.80861	188.571	TAGLN;SERPINE2;YWHAB;MDH2;DCN;CST3;COL3A1;LGALS1;LAMP1;P4HB;PPIB;MFGE8;PPIA	COVID 19
35	500 top downregulated genes for SARS-CoV-2 infection vs. mock from GSE161881	34/498	1.63e-20	5.08e-19	0	0	9.78207	445.687	LGALS3BP;GRN;SPARC;GSTP1;HSPB1;ENO1;CST3;LGALS1;PSAP;TIMP2;QSOX1;IGFBP6;TIMP1;CPA4;PDIA3;HSPA8;ANXA1;TPI1;MDH1;MDH2;TPM1;MSN;KRT10;PDIA6;NME1;EEF1A1;COL5A2;CALU;MYH9;NUCB1;CALR;VIM;PFN1;CD44	COVID 19
36	SARS perturbation; 214 Down Genes from GEN3VA; Human airway epithelium (HAE) cells; Accession: GSE47961 Platform: GPL6480; Entry 3	13/176	6.81e-09	6.91e-08	0	0	9.44467	177.6	ECM1;TAGLN;SPARC;MMP2;FN1;BGN;LOXL2;VCAN;COL3A1;COL4A2;COL5A2;SPOCK1;VIM	COVID 19
37	SARS perturbation; 112 Down Genes from GEN3VA; Human airway epithelium (HAE) cells; Accession: GSE47961 Platform: GPL6480; Entry 4	34881	2.33e-05	0.000124	0	0	9.12599	97.3502	TAGLN;COL3A1;COL1A2;FN1;SPOCK1;VIM;THBS2	COVID 19
38	SARS Perturbation; 209 Down Genes from GEN3VA Mouse Lung; Accession: GSE19137 Platform: GPL1261 Entry 5	14/198	3.1e-09	3.29e-08	0	0	9.05527	177.422	TAGLN;ANXA1;SERPINE2;NME2;FSTL1;DCN;CST3;COL3A1;LGALS1;LAMP1;P4HB;PPIB;PPIA;VCL	COVID 19
39	500 genes up-regulated by SARS-CoV-2 in A549-ACE2 cells from GSE154613 RS504393	30/467	2e-17	4.83e-16	0	0	8.93094	343.422	FBN2;C1R;SERPINE1;HSPB1;CXCL1;FSTL1;ACTG1;MT2A;LGALS1;TMSB4X;CFL1;COTL1;SPOCK1;FLNA;IGFBP7;TMSB10;S100A11;IGFBP4;MMP2;TPM1;ACTN4;MYL6;COL4A2;COL5A1;COL4A1;COL5A2;PTX3;VIM;MFGE8;MDGA1	COVID 19
40	SARS coronavirus excised polyprotein 1..4369 (gene: orf1ab) from Virus-Host PPI P-HIPSTer 2020	13/189	1.61e-08	1.56e-07	0	0	8.74127	156.875	APP;HSPA8;HSP90AA1;TPM4;HSPA5;TPM3;YWHAB;FN1;MSN;YWHAZ;PKM;MYH9;B2M	COVID 19
41	SARS Perturbation 320 Up Genes from GEN3VA Mouse Lung; Accession: GSE19137 Platform: GPL1261 Entry 1	20/305	4.36e-12	6.56e-11	0	0	8.62231	225.546	GRN;SPARC;IGFBP4;GSTP1;ANXA5;BGN;PEBP1;MSN;HSPB1;TXN;EEF2;YWHAZ;ACTB;ACTG1;EEF1A1;LASP1;ARHGDIA;ALB;PFN1;B2M	COVID 19
44	Top 500 downregulated genes for SARS-CoV-2 infection in human sclera from GSE164073	30/488	6.67e-17	1.53e-15	0	0	8.51221	317.05	SPON2;TAGLN;HSPB1;THBS1;ACTB;ACTG1;TUBA1C;LDHA;LASP1;CALD1;ARHGDIA;CFL1;PGK1;ANXA6;FLNA;A2M;HSPA8;HSP90AA1;TPI1;IGFBP4;ACTN1;PGAM1;TPM1;ACTN4;MYL6;FSCN1;MYH9;MFGE8;MDGA1;VCL	COVID 19
45	500 top upregulated genes from SARS-CoV-2 infection at 24 HPI from GSE157852	26/429	1.33e-14	2.63e-13	0	0	8.18807	261.646	TAGLN;COL11A1;SERPINE1;THBS1;CALD1;TMSB4X;COTL1;S100A11;CPA4;CTHRC1;ANXA1;TPM4;ANXA2;ACTN1;TPM1;FN1;PRDX6;NME1;COL1A1;MYL6;VCAN;COL4A1;MYH9;VIM;VCL;CD44	COVID 19
46	Top 500 up genes for SARS-CoV-2 early infection in human male blood from GSE161731	29/497	9.13e-16	1.99e-14	0	0	7.99483	276.858	GRN;GSTP1;CTSZ;ENO1;PLOD1;CST3;TUBA1C;MYDGF;ARHGDIA;CFL1;COTL1;SDF4;TIMP1;S100A11;CTSB;TPI1;ANXA2;MDH2;PGAM1;H2BC12;PKM;NUCB1;CALR;VIM;P4HB;PFN1;PPIB;ALDOA;GAPDH	COVID 19
47	61 genes down regulated by MERS and COVID-19 in Calu3 cells from two separate studies	22372	0.00217601	0.00658847	0	0	7.92541	48.5849	MDH1;PGK1;PEBP1;HSPE1	COVID 19
48	COVID19-Orf8 protein host PPI from Krogan	17227	0.00856456	0.0229089	0	0	7.66154	36.4699	COL6A1;PLOD2;MFGE8	COVID 19
49	500 genes down-regulated by MERS-CoV in Calu-3 cells from GSE122876	27/480	2.4e-14	4.56e-13	0	0	7.59463	238.162	APP;GRN;GSTP1;PEBP1;PLOD2;ACTB;ACTG1;TUBA1C;LASP1;LGALS1;PRDX1;PGK1;TIMP2;CD59;TIMP1;B2M;TMSB10;HSP90AA1;TPM4;ANXA2;TPM1;HSPE1;PRDX6;PPIA;GAPDH;VCL;CD44	COVID 19
50	Top 500 up genes for SARS-CoV-2 middle-stage infection in human male blood from GSE161731	27/497	5.56e-14	1.01e-12	0	0	7.31351	223.216	CTSZ;HSPB1;ENO1;PLOD1;ACTB;ACTG1;TUBA1C;ARHGDIA;CFL1;COTL1;SDF4;TIMP1;S100A11;TPI1;TPM3;MDH2;PGAM1;PRDX6;H2AJ;PKM;NUCB1;VIM;P4HB;PFN1;PPIB;ALDOA;GAPDH	COVID 19
51	455 genes downregulated by IAV-infection in mouse spleen	21/379	2.99e-11	4.21e-10	0	0	7.22585	175.101	PGAM1;GSTP1;BGN;NME2;EEF2;DCN;COL1A1;CST3;LASP1;PKM;COL4A2;BASP1;COL6A1;COTL1;FSCN1;PGK1;ANXA6;MFGE8;ALDOA;TXNDC5;LTF	COVID 19
52	500 genes up-regulated by SARS-CoV-2 in human Lung Organoid cells at 24 hpi from GSE148697	25/464	6.24e-13	1.01e-11	0	0	7.16726	201.425	FBN2;SERPINE2;C1S;C1R;COL12A1;SERPINE1;CXCL1;AFP;THBS1;LOXL2;C3;APOB;B2M;TPM4;ANXA2;FN1;EEF1A1;MYL6;COL3A1;COL5A1;COL4A1;COL5A2;PTX3;TGFBI;PPIA	COVID 19
53	Top 500 upregulated genes for SARS-CoV-2 infection in human lung organoids from GSE148697	25/464	6.24e-13	1.01e-11	0	0	7.16726	201.425	FBN2;SERPINE2;C1S;C1R;COL12A1;SERPINE1;CXCL1;AFP;THBS1;LOXL2;C3;APOB;B2M;TPM4;ANXA2;FN1;EEF1A1;MYL6;COL3A1;COL5A1;COL4A1;COL5A2;PTX3;TGFBI;PPIA	COVID 19
54	SARS-CoV perturbation; 409 Down Genes from GEN3VA; Human Vero E6 cells; Accession: GSE30589 Platform: GPL570 Entry 2	21/385	4.01e-11	5.46e-10	0	0	7.10455	170.081	HSP90AA1;TAGLN;TPI1;PGAM1;PEBP1;MSN;HSPB1;ENO1;PDIA6;HSP90B1;NME1;LGALS1;ARHGDIA;PSAP;COTL1;TIMP2;IGFBP6;TGFBI;TIMP1;PFN1;S100A11	COVID 19
55	500 genes up-regulated by SARS-CoV-2 in A549-ACE2 cells from GSE154613 berbamine	24/463	4.26e-12	6.56e-11	0	0	6.83618	178.976	LGALS3BP;GRN;IGFBP4;C1R;CLSTN1;CXCL1;PLOD1;ACTN4;EEF2;PDIA4;MYL6;PKM;COL4A2;COL5A1;SDF4;MYH9;NUCB1;QSOX1;CALR;P4HB;ALDOA;TMSB10;GAPDH;CTSB	COVID 19
56	152 Down Genes from GEN3VA Mouse Lung; Accession: GSE19137 Platform: GPL1261 Entry 6	8/148	5.72e-05	0.00028	0	0	6.57678	64.2532	COL3A1;LGALS1;ANXA1;PRDX1;BGN;PPIA;FSTL1;DCN	COVID 19
57	SARS Perturbation; 134 Down Genes from GEN3VA Mouse Lung; Accession: GSE19137 Platform: GPL1261 Entry 3	7/132	0.000188	0.000764	0	0	6.41265	55.0037	TAGLN;COL3A1;LGALS1;ANXA1;PPIA;FSTL1;DCN	COVID 19
58	Top 500 upregulated genes for SARS-CoV-2 in human colon organoid from GSE148696	22/452	1.2e-10	1.45e-09	0	0	6.31909	144.36	PDIA3;ANXA1;SERPINE2;TPM4;HSPA5;ANXA2;COL12A1;ANXA5;PLOD2;CXCL1;YWHAZ;FSTL1;C3;VCAN;LGALS1;VNN1;TMSB4X;CD59;TGFBI;VIM;B2M;S100A11	COVID 19
59	500 genes down regulated by MERS infection of Calu3 cells	23/475	4.86e-11	6.42e-10	0	0	6.31789	150.035	APP;HSP90AA1;GRN;TPM4;MDH1;GSTP1;TPM1;NME2;PEBP1;HSPE1;PRDX6;TUBA1C;LASP1;RCN1;PRDX1;PGK1;TIMP2;CD59;MFGE8;B2M;TMSB10;VCL;CD44	COVID 19
60	SARS coronavirus nsp3-pp1a/pp1ab (gene: orf1ab) from Virus-Host PPI P-HIPSTer 2020	6/116	0.000622	0.00222274	0	0	6.21471	45.8838	APP;YWHAB;FN1;MSN;MYH9;YWHAZ	COVID 19
61	500 genes down-regulated by SARS-CoV-2 in human Caco2 cells at 24h from GSE148729	23/490	9.01e-11	1.16e-09	0	0	6.11022	141.33	GRN;AHSG;GSTP1;SERPINF2;APOA1;AFP;EEF1A1;C3;COL2A1;COL4A1;APOH;PSAP;ALB;COL5A2;COL6A1;PGK1;TIMP2;CALR;APOB;A2M;MFGE8;B2M;CTSB	COVID 19
62	SARS-CoV perturbation; 381 Down Genes from GEN3VA; Human Vero E6 cells; Accession: GSE30589 Platform: GPL570 Entry 1	17/355	2.21e-08	2.1e-07	0	0	6.04885	106.621	PGAM1;MSN;HSPB1;PDIA6;HSP90B1;NME1;LGALS1;COL4A1;ARHGDIA;PSAP;COTL1;IGFBP6;TGFBI;TIMP1;PFN1;PPIB;S100A11	COVID 19
63	Top 500 up genes for SARS-CoV-2 late-stage infection in human male blood from GSE161731	23/496	1.15e-10	1.43e-09	0	0	6.03085	138.043	TPI1;MDH2;GSTP1;HBB;HSPB1;HBA2;ENO1;EEF2;PRDX6;ACTB;CST3;TUBA1C;PKM;ARHGDIA;CFL1;COTL1;NUCB1;TIMP1;VIM;P4HB;PFN1;ALDOA;GAPDH	COVID 19
64	Top 500 upregulated genes in mouse D2 cardiomyocytes with SARS-CoV-2 infection from GEO GSE162113	22/477	3.33e-10	3.92e-09	0	0	5.96419	130.164	TAGLN;SPARC;ANXA1;SERPINE2;LUM;COL11A1;COL12A1;SERPINE1;FN1;THBS1;ACTG1;LOXL2;COL1A1;LASP1;COL3A1;COL1A2;COL5A1;BASP1;TMSB4X;TGFBI;CPA4;FBN1	COVID 19
65	Top 500 down genes in human lung AT2 cells organoids from GSE160435	20/437	2.56e-09	2.79e-08	0	0	5.85313	115.803	SPARC;LUM;SERPINF1;COL11A1;COL12A1;CLEC11A;BGN;EEF2;THBS2;LOXL2;EEF1A1;COL1A1;COL3A1;COL1A2;COL5A1;COL5A2;COL6A1;A2M;FBN1;CTHRC1	COVID 19
66	SARS-CoV-2/Human Interactome Gene Set from Guzzi	30042	0.00630956	0.0170868	0	0	5.78549	29.3075	EEF1A1;ALB;ENO1;PPIA	COVID 19
67	500 genes down-regulated by SARS-CoV-2 in human Calu3 cells at 4h from GSE148729 mock s1 polyA	22/497	7.19e-10	8.03e-09	0	0	5.70717	120.157	PDIA3;GRN;ANXA1;ITIH2;ANXA2;MDH1;HSPE1;PDIA6;HSP90B1;NME1;EEF1A1;MYDGF;PRDX1;TMSB4X;PSAP;PGK1;CALU;TIMP2;CD59;CALR;PPIB;B2M	COVID 19
68	434 genes down-regulated by SARS-CoV-2 in ferret trachea from GSE147507	19/430	1.16e-08	1.15e-07	0	0	5.60812	102.486	TAGLN;GRN;BGN;APOA1;ENO1;PLOD1;HSPG2;COL1A1;COL4A2;COL5A1;COL4A1;GPC1;COL6A1;ANXA6;FLNA;IGFBP7;CALR;MFGE8;LTF	COVID 19
69	500 genes up-regulated by SARS-CoV-2 in mouse lung tissue from GSE150847	12/272	6.51e-06	4.24e-05	0	0	5.40608	64.5612	LGALS3BP;VCAN;GRN;COL4A1;SERPINE1;SETDB2;FN1;TGFBI;CCN1;B2M;PDIA6;THBS1	COVID 19
70	Top 500 downregulated genes in mouse spleen with SARS-CoV-2 infection (Day 7) from GEO GSE162113	19/456	2.96e-08	2.74e-07	0	0	5.26739	91.3178	SPARC;TPM4;HSPA5;ANXA2;MDH1;ANXA5;PEBP1;ENO1;PDIA6;YWHAZ;NME1;LDHA;RCN1;LGALS1;PRDX1;TMSB4X;CFL1;CALU;PPIB	COVID 19
71	500 genes up-regulated by SARS-CoV-2 in human intestinal organoids from GSE149312 differentiantion 24h	19/461	3.51e-08	3.19e-07	0	0	5.20646	89.3619	PDIA3;HSP90AA1;HSPA5;ACTN1;GSTP1;CTSZ;TXN;HSPE1;ACTB;PDIA4;HSP90B1;MYDGF;ARHGDIA;GPC1;FLNA;CALR;VIM;PPIB;S100A11	COVID 19
72	500 genes down-regulated by SARS-CoV-2 in human intestinal organoids from GSE149312 expansion 60h	19/462	3.64e-08	3.24e-07	0	0	5.19444	88.9775	APP;ECM1;GRN;TPI1;IGFBP4;ACTN1;CLSTN1;HSPB1;PLOD2;EEF2;LDHA;LGALS1;RAB40C;PSAP;COL6A1;PGK1;MYH9;QSOX1;ALDOA	COVID 19
73	SARS Perturbation; 246 Down Genes from GEN3VA Mouse Lung; Accession: GSE19137 Platform: GPL1261 Entry 2	10/234	5.1e-05	0.000253	0	0	5.17672	51.1683	COL3A1;SERPINE2;LAMP1;MDH1;YWHAB;PRDX1;BGN;VIM;PPIB;DCN	COVID 19
74	500 genes down-regulated by SARS-CoV-2 in A549-ACE2 cells from GSE154613 amlodipine	19/470	4.77e-08	4.16e-07	0	0	5.10019	85.9815	LGALS3BP;GRN;GSTP1;HSPB1;PLOD1;ACTN4;EEF2;HSPG2;LOXL2;COL4A2;COL5A1;ARHGDIA;GPC1;FSCN1;SDF4;MYH9;FLNA;NUCB1;MFGE8	COVID 19
75	SARS-CoV perturbation; 189 Down Genes from GEN3VA; Human bronchial epithelial 2B4 cells; Accession: GSE17400 Platform: GPL570; Entry 5	7/167	0.000779	0.00276067	0	0	5.00098	35.7957	LGALS1;HSPA5;YWHAB;CTSZ;ACTN4;TXN;CTSB	COVID 19
76	500 genes down-regulated by SARS-CoV-1 in human intestinal organoids from GSE149312 24h	18/456	1.56e-07	1.34e-06	0	0	4.94759	77.5299	LGALS3BP;APP;ECM1;GRN;TPI1;IGFBP4;PLOD2;LDHA;LGALS1;VNN1;PSAP;COL6A1;PGK1;QSOX1;TGFBI;ALDOA;B2M;GAPDH	COVID 19
77	COVID-19 patients BALF down	13/323	7.21e-06	4.49e-05	0	0	4.92894	58.358	LGALS3BP;GRN;PLOD1;PDIA6;THBS1;PDIA4;ARHGDIA;SDF4;MYH9;FLNA;NUCB1;QSOX1;TGFBI	COVID 19
78	Top 500 up genes from control vs. Ad5-hACE2 for SARS-CoV-2 infection in mouse lung from GSE158069	15/391	2.52e-06	1.88e-05	0	0	4.73007	60.9745	PDIA3;GRN;ACTN1;MMP2;CTSZ;ENO1;TUBA1C;BASP1;CFL1;COTL1;TGFBI;A2M;B2M;S100A11;CTSB	COVID 19
79	Down regulated gene from COVID-19 infected bronchoalveolar lavage from patients	14/370	6.45e-06	4.24e-05	0	0	4.63926	55.445	ANXA1;ANXA2;ANXA5;ACTN4;ACTB;ACTG1;ARHGDIA;CFL1;CD59;CALR;A2M;ALDOA;B2M;CD44	COVID 19
80	Top 500 up genes for SARS-CoV-2 infection Day 7 in ferret nasal turbinates from GSE160824	16/429	1.66e-06	1.27e-05	0	0	4.61278	61.3857	LGALS3BP;HSPA5;TPM3;MDH2;CTSZ;MSN;ENO1;PDIA6;ACTG1;PDIA4;HSP90B1;MYDGF;COTL1;NUCB1;CALR;P4HB	COVID 19
81	SARS-CoV perturbation; 493 Down Genes from GEN3VA; Human Vero E6 cells; Accession: GSE30589 Platform: GPL570 Entry 3	17/463	9.61e-07	7.62e-06	0	0	4.5587	63.1638	YWHAB;PGAM1;ANXA5;HSPB1;TXN;HSPE1;NME1;LDHA;LGALS1;PRDX1;CFL1;TIMP2;PFN1;PPIB;TMSB10;GAPDH;S100A11	COVID 19
82	500 genes up-regulated by SARS-CoV-2 in human A549 cells from GSE147507 Series2	18/495	5.21e-07	4.28e-06	0	0	4.53393	65.5957	PDIA3;LGALS3BP;HSP90AA1;ANXA1;ITIH2;TPM4;HSPA5;C1S;C1R;FN1;PLOD2;CXCL1;FSTL1;HSP90B1;C3;LDHA;PGK1;B2M	COVID 19
83	499 genes down-regulated by SARS-CoV-1 in Calu-3 cells from GSE148729	17/468	1.11e-06	8.66e-06	0	0	4.50699	61.7845	TPI1;TPM4;ANXA2;MDH1;TPM1;ENO1;TXN;NME1;EEF1A1;CST3;LDHA;LASP1;TMSB4X;PSAP;PGK1;CD59;VIM	COVID 19
84	500 genes down-regulated by SARS-CoV-2 in mouse Heart cells at 7 dpi from GSE162113	16/444	2.59e-06	1.88e-05	0	0	4.44768	57.2171	TAGLN;SPARC;TPI1;TPM4;ANXA2;MDH1;LUM;ANXA5;HSPE1;LGALS1;TMSB4X;CFL1;PGK1;CALU;IGFBP7;CTSB	COVID 19
85	Top 500 downregulated genes in mouse heart with SARS-CoV-2 infection (Day 7) from GEO GSE162113	16/444	2.59e-06	1.88e-05	0	0	4.44768	57.2171	TAGLN;SPARC;TPI1;TPM4;ANXA2;MDH1;LUM;ANXA5;HSPE1;LGALS1;TMSB4X;CFL1;PGK1;CALU;IGFBP7;CTSB	COVID 19
86	500 genes up-regulated by SARS-CoV-1 in human intestinal organoids from GSE149312 24h	16/459	3.96e-06	2.78e-05	0	0	4.29376	53.4149	HSPA8;TAGLN;ANXA1;ANXA2;TXNRD1;TPM1;CXCL1;ACTN4;YWHAZ;THBS1;ACTB;ACTG1;NME1;TUBA1C;TMSB4X;VCL	COVID 19
87	500 genes down-regulated by SARS-CoV-2 in mouse Lung cells at 7 dpi from GSE162113	15/432	8.4e-06	5.09e-05	0	0	4.25601	49.7392	HSPA8;HSP90AA1;ANXA1;TPI1;HSPA5;LUM;PDIA6;PDIA4;HSP90B1;LDHA;VCAN;RCN1;COL5A2;CALU;CTSB	COVID 19
88	Top 500 downregulated genes in mouse lung with SARS-CoV-2 infection (Day 7) from GEO GSE162113	15/432	8.4e-06	5.09e-05	0	0	4.25601	49.7392	HSPA8;HSP90AA1;ANXA1;TPI1;HSPA5;LUM;PDIA6;PDIA4;HSP90B1;LDHA;VCAN;RCN1;COL5A2;CALU;CTSB	COVID 19
89	SARS-CoV perturbation; 338 Up Genes from GEN3VA; Human Vero E6 cells; Accession: GSE30589 Platform: GPL570 Entry 5	11/314	0.000128	0.000553	0	0	4.2177	37.7988	HSPA8;HSP90AA1;ITIH2;HSPA5;PRDX1;PGAM1;HSPB1;PTX3;CALR;HSPE1;HSP90B1	COVID 19
90	500 genes down-regulated by SARS-CoV-2 in human intestinal organoids from GSE149312 expansion 24h	16/467	4.93e-06	3.41e-05	0	0	4.21585	51.5224	LGALS3BP;APP;ECM1;TPI1;IGFBP4;PLOD2;PDIA6;LGALS1;VNN1;PSAP;COL6A1;ANXA6;QSOX1;TGFBI;ALDOA;GAPDH	COVID 19
91	500 genes up-regulated by SARS-CoV-2 in A549-ACE2 cells from GSE154613 trifluoperazine	16/471	5.49e-06	3.74e-05	0	0	4.17793	50.6091	LGALS3BP;IGFBP4;NME2;HSPB1;ACTN4;EEF2;PDIA4;COL4A2;COL5A1;ARHGDIA;GPC1;COL6A1;FSCN1;SDF4;CALR;PFN1	COVID 19
92	SARS-CoV perturbation; 477 Down Genes from GEN3VA; Human Vero E6 cells; Accession: GSE30589 Platform: GPL570 Entry 4	15/444	1.16e-05	6.76e-05	0	0	4.1344	46.9757	YWHAB;PGAM1;TXN;NME1;LDHA;VCAN;LGALS1;CFL1;TIMP2;TIMP1;PFN1;PPIB;TMSB10;GAPDH;S100A11	COVID 19
93	500 genes up-regulated by SARS-CoV-2 in human A549 cells from GSE154613	16/476	6.27e-06	4.2e-05	0	0	4.13145	49.4969	ITIH2;SERPINE2;HSPA5;C1S;IGFBP4;C1R;COL12A1;PLOD2;CXCL1;FSTL1;C3;VNN1;TGFBI;B2M;CD44;CTSB	COVID 19
96	500 genes down-regulated by MHV-A59 in murine spleen cells from GSE146074 5d	15/448	1.29e-05	7.41e-05	0	0	4.09536	46.0994	TPM4;TPM3;YWHAB;ACTN1;MSN;EEF2;YWHAZ;EEF1A1;COL1A1;COL3A1;COL1A2;TMSB4X;ANXA6;MYH9;TMSB10	COVID 19
97	500 genes up-regulated by SARS-CoV-2 (0.2 MOI) in human A549 cells from GSE147507	16/480	6.96e-06	4.4e-05	0	0	4.09499	48.63	PDIA3;LGALS3BP;HSP90AA1;ITIH2;HSPA5;C1S;C1R;FN1;PLOD2;CXCL1;FSTL1;HSP90B1;C3;LDHA;PGK1;B2M	COVID 19
98	500 up regulated genes in A549 cells infected with COVID-19 extracted from GSE147507	16/480	6.96e-06	4.4e-05	0	0	4.09499	48.63	PDIA3;LGALS3BP;HSP90AA1;ITIH2;HSPA5;C1S;C1R;FN1;PLOD2;CXCL1;FSTL1;HSP90B1;C3;LDHA;PGK1;B2M	COVID 19
99	500 genes up-regulated by SARS-CoV-2 in human H1299 cells at 4h from GSE148729 untreated	16/489	8.78e-06	5.17e-05	0	0	4.0152	46.7505	TPM4;TPM3;SERPINE1;CXCL1;ACTN4;ACTB;ACTG1;ARHGDIA;COL6A1;FSCN1;MYH9;FLNA;PTX3;CALR;TIMP1;GAPDH	COVID 19
100	500 genes up-regulated by SARS-CoV-2 in human lung cells from GSE147507	16/489	8.78e-06	5.17e-05	0	0	4.0152	46.7505	SERPINE2;TPM4;C1S;HBB;HBA2;YWHAZ;ACTB;NME1;CDH2;BASP1;COL4A1;CFL1;PFN1;B2M;S100A11;LTF	COVID 19
101	500 genes upregulated by SARS-CoV-2 in human lung tissue from GSE147507	15/461	1.81e-05	0.000101	0	0	3.97333	43.3945	SERPINE2;TPM4;C1S;HBB;HBA2;YWHAZ;ACTB;NME1;CDH2;BASP1;CFL1;PFN1;B2M;S100A11;LTF	COVID 19
102	Healthy human lung biopsy vs. COVID-19 infected human lung series 15 from GSE147507 up genes	15/461	1.81e-05	0.000101	0	0	3.97333	43.3945	SERPINE2;TPM4;C1S;HBB;HBA2;YWHAZ;ACTB;NME1;CDH2;BASP1;CFL1;PFN1;B2M;S100A11;LTF	COVID 19
103	500 genes down-regulated by SARS-CoV-1 in human intestinal organoids from GSE149312 60h	15/463	1.9e-05	0.000104	0	0	3.95518	42.9968	APP;ECM1;GRN;IGFBP4;HSPB1;PLOD2;LDHA;LGALS1;PSAP;COL6A1;PGK1;MYH9;QSOX1;ALDOA;B2M	COVID 19
104	Top 150 negative hits from GSE154783: SARS-CoV-2 CRISPR screen in Vero-E6 cells	5/148	0.0107455	0.0273979	0	0	3.95426	17.9257	LGALS1;SERPINE2;SERPINF2;MDGA1;FBN1	COVID 19
105	Top 500 upregulated genes in mouse kidney with SARS-CoV-2 infection (Day 3) from GEO GSE162113	13/399	6.55e-05	0.000314	0	0	3.94305	37.9864	LGALS3BP;FN1;DCN;LOXL2;DKK3;C3;COL1A1;COL1A2;COL5A1;COL5A2;COL6A1;TGFBI;FBN1	COVID 19
106	Top 500 down genes for SARS-CoV-2 infection Day 21 in ferret right cranial lung from GSE160824	12/367	0.000121	0.000529	0	0	3.94015	35.5269	ITIH4;COL3A1;COL1A2;DAAM1;COL5A1;MMP2;FN1;TIMP2;BGN;PLOD2;FSTL1;FBN1	COVID 19
107	Top 500 downregulated genes in mouse D1 cardiomyocytes with SARS-CoV-2 infection from GEO GSE162113	15/465	2e-05	0.000108	0	0	3.9372	42.6039	LGALS3BP;HSP90AA1;TPI1;MDH1;MDH2;TPM1;PEBP1;DKK3;EEF1A1;COL2A1;PRDX1;PSAP;PGK1;ANXA6;MFGE8	COVID 19
108	Top 500 up genes for SARS-CoV-2 infection in Rhesus macaques at Group 1 dose in Bronchoalveolar Lavage at 10 DPI from GSE156701	15/472	2.38e-05	0.000125	0	0	3.87549	41.2647	ECM1;SPARC;C1S;LUM;PGAM1;CLSTN1;BGN;DKK3;C3;COL1A1;COL3A1;COL1A2;GPC1;IGFBP7;TXNDC5	COVID 19
109	Top 500 down genes for SARS-CoV-2 infection Day 14 in ferret right cranial lung from GSE160824	13/407	8e-05	0.000371	0	0	3.8614	36.427	LUM;MMP2;FN1;BGN;COL1A1;COL3A1;COL1A2;DAAM1;COL5A1;COL6A1;TIMP2;IGFBP6;FBN1	COVID 19
110	Top 500 upregulated genes for SARS-CoV-2 infection in human sclera from GSE164073	15/475	2.56e-05	0.000133	0	0	3.84962	40.7074	SERPINE2;C1S;C1R;LUM;SERPINF1;MMP2;FN1;CXCL1;TXN;DCN;C3;PTX3;TGFBI;B2M;FBN1	COVID 19
111	500 genes up-regulated by SARS-CoV-2 in human Caco2 cells at 4h from GSE148729 mock	15/485	3.25e-05	0.000167	0	0	3.76576	38.9183	IGFBP4;TXNRD1;SERPINE1;FN1;EEF2;YWHAZ;ACTG1;LASP1;DAAM1;FLNA;CD59;TACC2;P4HB;APOB;CTSB	COVID 19
112	Top 500 down genes for SARS-CoV-2 infection Day 21 in ferret right caudal lung from GSE160824	14/462	7.45e-05	0.000353	0	0	3.66913	34.8752	ECM1;SPARC;LUM;MMP2;FN1;BGN;THBS1;FSTL1;DKK3;COL3A1;COL1A2;TIMP2;VCL;FBN1	COVID 19
114	500 genes up-regulated by SARS-CoV-2 in human Organoids cells from GSE154613	14/464	7.8e-05	0.000366	0	0	3.65244	34.5491	LGALS3BP;C1S;C1R;SERPINE1;CXCL1;C3;MT2A;LDHA;VNN1;PTX3;A2M;B2M;MDGA1;CD44	COVID 19
115	500 genes down-regulated by SARS-CoV-2 in A549-ACE2 cells from GSE154613 loperamide	14/467	8.35e-05	0.000383	0	0	3.62769	34.0673	TPI1;GSTP1;PLOD1;ACTN4;TUBA1C;PKM;COL4A2;ARHGDIA;APOH;CFL1;SDF4;MYH9;FLNA;ALDOA	COVID 19
116	Top 500 down genes for SARS-CoV-2 infection Day 14 in ferret nasal turbinates from GSE160824	12/397	0.000251	0.000994	0	0	3.62753	30.0764	FBN2;ITIH4;VCAN;DAAM1;IGFBP4;COL11A1;IGFBP7;THBS1;VCL;DCN;CD44;FBN1	COVID 19
117	630 genes downregulated by cystine and theanine in IAV-infected mouse spleen	15/504	5.03e-05	0.000252	0	0	3.61589	35.7877	ACTN1;PGAM1;ANXA5;BGN;YWHAZ;CST3;RCN1;COL1A2;PKM;TIMP2;MYH9;ALDOA;B2M;TXNDC5;FBN1	COVID 19
118	Top 500 up genes for SARS-CoV-2 infection in Rhesus macaques at Group 1 dose in PBMCs at 7 DPI from GSE156701	14/469	8.73e-05	0.000397	0	0	3.61138	33.7509	LGALS3BP;HSPA5;ACTN1;TPM1;HBB;ENO1;PRDX6;MYL6;VNN1;PKM;PTX3;PPIA;CTSB;LTF	COVID 19
119	Top 500 downregulated genes in mouse kidney with SARS-CoV-2 infection (Day 3) from GEO GSE162113	13/434	0.000151	0.000635	0	0	3.60873	31.7394	PDIA3;HSPA8;HSP90AA1;HSPA5;MDH2;PGAM1;SERPINF2;PDIA6;ACTB;HSP90B1;NME1;TUBA1C;CALR	COVID 19
120	500 genes up-regulated by SARS-CoV-2 (2 MOI) in human A549 cells from GSE147507	14/470	8.93e-05	0.000402	0	0	3.60327	33.5941	SERPINE2;C1S;C1R;COL12A1;SERPINE1;CXCL1;FSTL1;C3;MT2A;ABCA10;CDH2;DAAM1;COL5A1;PTX3	COVID 19
121	500 genes down-regulated by MHV-A59 in murine spleen cells from GSE146074 3d	13/437	0.000162	0.000673	0	0	3.58265	31.2677	YWHAB;ACTN1;EEF2;EEF1A1;MYL6;ARHGDIA;TMSB4X;ANXA6;MYH9;FLNA;IGFBP7;TMSB10;TXNDC5	COVID 19
122	500 genes up-regulated by SARS-CoV-2 in human pancreatic organoids from GSE151803	13/438	0.000166	0.000682	0	0	3.57403	31.1125	LGALS3BP;SPON2;SERPINE2;PLOD2;C3;MT2A;LDHA;LGALS1;VNN1;PTX3;PPIB;A2M;B2M	COVID 19
123	Top 500 up genes for SARS-CoV-2 infection in Rhesus macaques at Group 1 dose in Bronchoalveolar Lavage at 2 DPI from GSE156701	14/475	9.99e-05	0.000444	0	0	3.56327	32.8238	LGALS3BP;C1S;C1R;PGAM1;CLSTN1;THBS1;C3;TUBA1C;COL1A2;GPC1;FSCN1;IGFBP7;TIMP1;TXNDC5	COVID 19
124	COVID-19 patients PBMC up	15/514	6.28e-05	0.000304	0	0	3.5416	34.2686	TPI1;ANXA2;CTSZ;ANXA5;FN1;ENO1;NME1;MYDGF;LDHA;LGALS1;PKM;PRDX1;TIMP1;GAPDH;CTSB	COVID 19
125	Top 500 up genes for SARS-CoV-2 infection in Rhesus macaques at Group 1 dose in PBMCs at 2 DPI from GSE156701	14/478	0.000107	0.00047	0	0	3.53968	32.3724	LGALS3BP;ECM1;ANXA2;IGFBP4;HSPB1;ENO1;PDIA6;MT2A;GPC1;ANXA6;PTX3;TIMP1;GAPDH;CTSB	COVID 19
126	447 genes down-regulated by SARS-CoV-2 infection in Vero E6 cells from GSE153940	13/444	0.000189	0.000764	0	0	3.52319	30.2014	SPARC;TPI1;MDH1;GSTP1;ANXA5;MSN;PDIA6;CST3;PSAP;TIMP2;PPIA;CD44;CTSB	COVID 19
127	Top 500 down genes for SARS-CoV-2 infection in Mesocricetus auratus hamster lung Day 14 from GSE162208	11/378	0.000622	0.00222274	0	0	3.47077	25.6235	SPON2;SERPINE2;ANXA2;SERPINF1;SERPINE1;PGK1;HSPB1;PTX3;S100A11;TUBA8;LTF	COVID 19
128	Top 500 down genes for SARS-CoV-2 infection 48 hpi in human alveolar organoids for GSE152586	13/454	0.000235	0.00094	0	0	3.44152	28.7572	HSPA8;MDH1;MDH2;PEBP1;TXN;HSPE1;THBS1;NME1;TUBA1C;UCHL1;RAB40C;ARHGDIA;PRDX1	COVID 19
129	500 genes up-regulated by SARS-CoV-2 in human A549 cells from GSE147507 Series5	14/494	0.00015	0.000635	0	0	3.41886	30.0936	SERPINE2;C1S;C1R;COL12A1;SERPINE1;CXCL1;FSTL1;C3;MT2A;ABCA10;CDH2;DAAM1;COL5A1;PTX3	COVID 19
130	500 genes up-regulated by SARS-CoV-2 in human Caco2 cells at 4h from GSE148729 untreated	14/494	0.00015	0.000635	0	0	3.41886	30.0936	HSPA8;IGFBP4;TXNRD1;SERPINE1;YWHAZ;ACTG1;TUBA1C;GPC1;TIMP2;FLNA;CD59;VIM;TMSB10;S100A11	COVID 19
131	Top 500 up genes for SARS-CoV-2 infection in Rhesus macaques at Group 1 dose in Bronchoalveolar Lavage at 1 DPI from GSE156701	13/462	0.000278	0.00109222	0	0	3.37881	27.6645	LGALS3BP;GRN;IGFBP4;PGAM1;TXNRD1;SERPINE1;THBS1;C3;MT2A;UCHL1;COL3A1;TGFBI;TXNDC5	COVID 19
132	Top 500 up genes for SARS-CoV-2 infection Day 14 in ferret right cranial lung from GSE160824	11/393	0.000855	0.00298368	0	0	3.33192	23.5364	TPI1;TPM3;MDH2;PGAM1;PGK1;QSOX1;ENO1;TXN;PPIA;PRDX6;GAPDH	COVID 19
133	Top 500 upregulated genes for SARS-CoV-2 infection in human cornea from GSE164073	13/470	0.000328	0.00127579	0	0	3.31829	26.6237	C1S;C1R;LUM;MMP2;COL11A1;FN1;FBLN1;CXCL1;C3;ARHGAP20;COL3A1;COL6A1;SPOCK1	COVID 19
134	Top 500 up genes for SARS-CoV-2 infection in Rhesus macaques at Group 1 dose in Bronchoalveolar Lavage at 7 DPI from GSE156701	13/472	0.000341	0.00131672	0	0	3.30349	26.3713	SPARC;C1S;PGAM1;DKK3;C3;COL3A1;COL1A2;GPC1;IGFBP7;TIMP1;MFGE8;TXNDC5;LTF	COVID 19
135	Top 500 down genes for SARS-CoV-2 infection in Mesocricetus auratus hamster lung Day 3 from GSE162208	12/434	0.000557	0.00205919	0	0	3.30318	24.7487	SPON2;H2AJ;TAGLN;SERPINE2;COL4A2;SERPINF1;CLEC11A;ANXA6;HSPB1;IGFBP6;MFGE8;PRDX6	COVID 19
136	SARS perturbation; 220 Down Genes from GEN3VA; Human PBMCs; Accession: GDS1028 Platform: GPL201	6/212	0.0122208	0.0299342	0	0	3.30237	14.5457	SPON2;HSPA8;HSP90AA1;PPIA;YWHAZ;CD44	COVID 19
137	SARS Perturbation; 224 Down Genes from GEN3VA Mouse Lung; Accession: GSE19137 Platform: GPL1261 Entry 4	6/213	0.0124845	0.0304092	0	0	3.28625	14.4045	EEF1A1;TAGLN;SERPINE2;PRDX1;PPIA;DCN	COVID 19
138	500 genes down-regulated by SARS-CoV-2 in mouse Kidney cells at 7 dpi from GSE162113	12/439	0.000616	0.00222274	0	0	3.26366	24.1238	TUBA1C;MYDGF;LDHA;HSP90AA1;TPI1;MDH1;PRDX1;CFL1;PPIB;HSPE1;PDIA6;NME1	COVID 19
139	Top 500 downregulated genes in mouse kidney with SARS-CoV-2 infection (Day 7) from GEO GSE162113	12/439	0.000616	0.00222274	0	0	3.26366	24.1238	TUBA1C;MYDGF;LDHA;HSP90AA1;TPI1;MDH1;PRDX1;CFL1;PPIB;HSPE1;PDIA6;NME1	COVID 19
140	500 genes up-regulated by SARS-CoV-2 in A549-ACE2 cells from GSE154613 loperamide	12/454	0.000826	0.00290446	0	0	3.15046	22.3647	EEF1A1;FBN2;SERPINE2;HSPA5;C1S;TXNRD1;PLOD2;CXCL1;PTX3;TGFBI;B2M;YWHAZ	COVID 19
141	Top 500 up genes for COVID-19 mild disease in human NK cells from GSE165461	13/494	0.000525	0.00197151	0	0	3.14881	23.783	HSP90AA1;SPARC;ACTN1;HBB;HBA2;PRDX6;EEF1A1;MT2A;VCAN;LGALS1;PSAP;COTL1;CD44	COVID 19
142	500 genes down-regulated by SARS-CoV-2 in human A549 cells from GSE154613	11/417	0.00137739	0.00451536	0	0	3.13108	20.6262	COL1A1;ITIH4;LASP1;ANXA2;SERPINE1;MYH9;FLNA;ACTN4;PFN1;THBS1;VCL	COVID 19
143	500 genes down-regulated by SARS-CoV-2 in human Calu3 cells at 4h from GSE148729 untreated s1 polyA	13/497	0.000555	0.00205919	0	0	3.12881	23.4551	GRN;ANXA1;ANXA2;HSP90B1;EEF1A1;MYDGF;DAAM1;TMSB4X;PSAP;TIMP2;CALR;B2M;MDGA1	COVID 19
144	500 genes up-regulated by SARS-CoV-2 in human intestinal organoids from GSE149312 expansion 24h	12/459	0.000908	0.0031419	0	0	3.11442	21.8143	HSPA8;TUBA1C;ANXA1;TPM4;ANXA2;TPM1;KRT10;THBS1;FSTL1;S100A11;ACTG1;NME1	COVID 19
145	Top 500 up genes for SARS-CoV-2 infection in Rhesus macaques at Group 1 dose in Bronchoalveolar Lavage at 14 DPI from GSE156701	12/464	0.000997	0.00342141	0	0	3.07917	21.2806	C3;COL1A1;UCHL1;COL3A1;SPARC;COL1A2;LUM;CLSTN1;COL12A1;FBLN1;IGFBP7;DKK3	COVID 19
146	Top 500 up genes for SARS-CoV-2 infection in Mesocricetus auratus hamster blood Day 5 from GSE162208	7/267	0.0104106	0.0267001	0	0	3.06187	13.9772	H2AJ;MDH2;PRDX1;CFL1;CCN2;TMSB10;S100A11	COVID 19
147	SARS Perturbation 357 Up Genes from GEN3VA Mouse Lung; Accession: GSE68820 Platform: GPL7202 Entry 4	9/347	0.00414148	0.0118795	0	0	3.05164	16.7434	LGALS3BP;VCAN;GRN;BASP1;PTX3;TGFBI;TIMP1;A2M;THBS1	COVID 19
148	Top 500 up genes for SARS-CoV-2 infection in Rhesus macaques at Group 2 dose in Bronchoalveolar Lavage at 10 DPI from GSE156701	12/470	0.00111235	0.00378896	0	0	3.03789	20.6615	C3;COL1A1;COL3A1;SPARC;COL1A2;C1S;LUM;GPC1;FSCN1;FBLN1;IGFBP6;TXNDC5	COVID 19
149	500 genes down-regulated by MERS-CoV in Calu-3 cells from GSE139516 6h	12/472	0.00115334	0.0038981	0	0	3.02437	20.4601	C3;TUBA1C;LGALS1;IGFBP4;MDH2;GSTP1;FSCN1;HSPB1;NUCB1;ALDOA;TMSB10;PRDX6	COVID 19
150	355 proteins up-regualated at 12h in SARS-CoV-2 infected cells from Bouhaddou et al. 2020	9/352	0.00454305	0.0127792	0	0	3.00638	16.2169	PKM;ANXA2;HSPB1;MYH9;EEF2;ALDOA;PPIA;GAPDH;VCL	COVID 19
151	235 proteins up-regualated in SARS-CoV-2 infected cells from Bouhaddou et al. 2020	6/233	0.0186308	0.0439083	0	0	2.99366	11.9236	PKM;HSPB1;MYH9;EEF2;PPIA;VCL	COVID 19
152	Top 500 up genes for SARS-CoV-2 infection in Rhesus macaques at Group 2 dose in Bronchoalveolar Lavage at 7 DPI from GSE156701	12/477	0.00126132	0.00423027	0	0	2.99108	19.9672	C3;ECM1;COL3A1;COL1A2;LAMP1;C1S;GPC1;FSCN1;FN1;IGFBP7;A2M;TXNDC5	COVID 19
153	499 genes down-regulated by SARS-CoV-2 in Calu-3 cells from GSE148729	11/437	0.00199085	0.00620008	0	0	2.98101	18.5395	H2BC12;ANXA1;MDH1;TMSB4X;GSTP1;PSAP;TXN;TIMP1;HSPE1;TMSB10;S100A11	COVID 19
154	500 genes down regulated by SARS-COV-2 infection of Calu3 cells	12/479	0.0013068	0.00431639	0	0	2.97796	19.7742	HSPA8;VCAN;PKM;MDH1;ANXA5;PGK1;PEBP1;ENO1;IGFBP6;PFN1;HSPE1;NME1	COVID 19
155	500 genes down-regulated by SARS-CoV-2 (2 MOI) in human Calu-3 cells from GSE147507	12/479	0.0013068	0.00431639	0	0	2.97796	19.7742	HSPA8;VCAN;PKM;MDH1;ANXA5;PGK1;PEBP1;ENO1;IGFBP6;PFN1;HSPE1;NME1	COVID 19
156	500 genes down-regulated by SARS-CoV-2 in human Nasal Epithelial Cells cells at 24 hpi from GSE162131	11/440	0.00209959	0.00644663	0	0	2.95971	18.2496	ARHGAP20;RCN1;HSPA5;C1S;C1R;SERPINF1;PRDX1;TXNRD1;SERPINF2;PRDX6;DKK3	COVID 19
157	Top 500 downregulated genes in human nasal epithelial cells with SARS-CoV-2 infection (Wild Type, 24 hpi) from GEO GSE162131	11/440	0.00209959	0.00644663	0	0	2.95971	18.2496	ARHGAP20;RCN1;HSPA5;C1S;C1R;SERPINF1;PRDX1;TXNRD1;SERPINF2;PRDX6;DKK3	COVID 19
158	500 genes up-regulated by SARS-CoV-2 in human H1299 cells at 36h from GSE148729	12/483	0.00140184	0.00456121	0	0	2.95206	19.3949	TUBA1C;RCN1;ANXA1;TPI1;LAMP1;CALD1;CLEC11A;NME2;PEBP1;QSOX1;PTX3;ENO1	COVID 19
159	Top 500 down genes for SARS-CoV-2 infection in Mesocricetus auratus hamster lung Day 5 from GSE162208	11/442	0.00217473	0.00658847	0	0	2.94567	18.0595	COL1A1;SPON2;COL4A2;COL5A1;COL4A1;MMP2;CLSTN1;COL12A1;BGN;HSPG2;FBN1	COVID 19
160	500 genes up-regulated by SARS-CoV-2 in human NHBE cells from GSE147507	12/486	0.00147682	0.00476957	0	0	2.93292	19.1164	C3;TUBA1C;VNN1;ANXA1;C1S;C1R;ACTN1;COL12A1;FN1;ANXA6;MSN;CXCL1	COVID 19
161	500 genes down-regulated by SARS-CoV-2 in human Calu3 cells at 4h from GSE148729 mock polyA	12/489	0.00155508	0.00494902	0	0	2.91402	18.8427	CST3;MYDGF;LGALS1;TPI1;ANXA2;SERPINF1;IGFBP7;IGFBP6;PFN1;PPIB;HSPE1;NME1	COVID 19
162	500 genes up-regulated by SARS-CoV-2 in human Caco2 cells at 24h from GSE148729	12/489	0.00155508	0.00494902	0	0	2.91402	18.8427	FBN2;VCAN;ANXA1;C1S;IGFBP4;GPC1;SERPINE1;FSCN1;FLNA;VIM;TMSB10;ACTG1	COVID 19
163	500 genes down-regulated by SARS-CoV-2 in human Calu3 cells from GSE147507	12/491	0.00160914	0.00508394	0	0	2.90155	18.663	HSPA8;VCAN;PKM;MDH1;ANXA5;PGK1;PEBP1;ENO1;IGFBP6;PFN1;HSPE1;NME1	COVID 19
164	500 genes down-regulated by SARS-CoV-2 382-deletion mutant in human Nasal Epithelial Cells cells at 24 hpi from GSE162131	11/449	0.00245515	0.00733181	0	0	2.89755	17.413	ARHGAP20;RCN1;HSPA5;C1S;C1R;SERPINF1;PRDX1;GSTP1;TXNRD1;EEF2;DKK3	COVID 19
165	Top 500 downregulated genes in human nasal epithelial cells with SARS-CoV-2 infection (Mutant, 24 hpi) from GEO GSE162131	11/449	0.00245515	0.00733181	0	0	2.89755	17.413	ARHGAP20;RCN1;HSPA5;C1S;C1R;SERPINF1;PRDX1;GSTP1;TXNRD1;EEF2;DKK3	COVID 19
167	498 genes down-regulated by SARS-CoV-1 in Calu-3 cells from GSE148729	10/409	0.00387949	0.0112017	0	0	2.88028	15.9915	EEF1A1;ANXA1;TPI1;ANXA2;MDH1;PSAP;TXN;B2M;TMSB10;NME1	COVID 19
168	500 genes down-regulated by SARS-CoV-2 in human Calu3 cells at 24h from GSE148729 polyA	12/498	0.00181069	0.00567957	0	0	2.85873	18.0501	EEF1A1;LDHA;LASP1;TPM4;ANXA2;MDH1;TPM1;PSAP;PGK1;TGFBI;KRT10;VIM	COVID 19
170	Top 500 up genes for SARS-CoV-2 infection in Rhesus macaques at Group 2 dose in Bronchoalveolar Lavage at 4 DPI from GSE156701	11/468	0.00336668	0.00991805	0	0	2.77436	15.7967	C3;LGALS3BP;TUBA1C;COL3A1;COL4A2;C1S;IGFBP4;COL4A1;GPC1;FN1;IGFBP7	COVID 19
172	Top 500 up genes for SARS-CoV-2 infection in Rhesus macaques at Group 3 dose in Bronchoalveolar Lavage at 1 DPI from GSE156701	11/471	0.00353269	0.0103373	0	0	2.75584	15.5586	C3;IGFBP4;ACTN1;MMP2;SERPINE1;FN1;MSN;NUCB1;PLOD1;A2M;TXNDC5	COVID 19
174	Top 500 up genes for SARS-CoV-2 infection in Rhesus macaques at Group 3 dose in Bronchoalveolar Lavage at 10 DPI from GSE156701	11/472	0.00358946	0.0104334	0	0	2.74972	15.4802	C3;GRN;COL3A1;COL1A2;IGFBP4;PGAM1;COTL1;IGFBP7;A2M;TXNDC5;CTSB	COVID 19
175	500 genes down-regulated by SARS-CoV-2 in Calu-3 cells from GSE148729	11/483	0.00426364	0.01215	0	0	2.68411	14.6489	EEF1A1;LDHA;LASP1;MDH1;TPM1;ANXA5;PGK1;MYH9;CD59;TGFBI;VIM	COVID 19
176	Top 500 downregulated genes in mouse heart with SARS-CoV-2 infection from GEO GSE162113	10/438	0.00622186	0.0169546	0	0	2.68111	13.6192	SPON2;HSPA8;MYL6;COL4A2;COL4A1;PGAM1;ACTN4;ACTB;ACTG1;TUBA8	COVID 19
177	500 genes down-regulated by SARS-CoV-2 in human Calu3 cells at 4h from GSE148729 mock totalRNA	11/486	0.00446402	0.0126384	0	0	2.66674	14.4316	ANXA1;MDH1;MDH2;TMSB4X;GSTP1;PSAP;TXN;TIMP1;HSPE1;TMSB10;S100A11	COVID 19
178	Top 500 up genes for SARS-CoV-2 infection Day 21 in ferret right cranial lung from GSE160824	9/398	0.00982366	0.0254947	0	0	2.64461	12.2259	TPM3;PGK1;PEBP1;ENO1;TXN;HSPE1;PPIA;PRDX6;GAPDH	COVID 19
179	500 genes down-regulated by SARS-CoV-2 in human Calu3 cells at 24h from GSE148729 totalRNA	11/495	0.00511056	0.0141026	0	0	2.61594	13.8028	EEF1A1;LDHA;LASP1;ANXA2;MDH1;TPM1;ANXA5;PGK1;MYH9;TGFBI;VIM	COVID 19
180	Top 500 up genes for COVID-19 severe disease in human NK cells from GSE165461	11/495	0.00511056	0.0141026	0	0	2.61594	13.8028	PDIA3;HSP90AA1;VCAN;HSPA5;COTL1;PEBP1;HBB;HBA2;PRDX6;THBS1;CTSB	COVID 19
182	500 genes down-regulated by SARS-CoV-2 in mouse lung tissue from GSE150847	8/358	0.0155429	0.0370312	0	0	2.60264	10.8378	ARHGAP20;TAGLN;PEBP1;APOA1;APOB;GC;DCN;KRT9	COVID 19
186	500 genes down-regulated by SARS-CoV-2 in human intestinal organoids from GSE149312 differentiation 60h	10/456	0.00815431	0.0219462	0	0	2.57052	12.3621	LDHA;PKM;SERPINE2;COTL1;TIMP2;HSPB1;PLOD2;CXCL1;AFP;GAPDH	COVID 19
187	500 genes down-regulated by MHV-A59 in murine liver cells from GSE146074 3d	9/410	0.0117605	0.0294687	0	0	2.56388	11.3914	ECM1;ITIH2;IGFBP4;AHSG;SERPINF1;ALB;PEBP1;EEF2;PRDX6	COVID 19
188	Top 500 up genes for SARS-CoV-2 infection Day 21 in ferret right caudal lung from GSE160824	9/410	0.0117605	0.0294687	0	0	2.56388	11.3914	MYDGF;LGALS1;TPM3;GSTP1;PGAM2;COTL1;ENO1;TMSB10;GAPDH	COVID 19
189	500 genes down-regulated by SARS-CoV-2 in mouse Liver cells at 3 dpi from GSE162113	9/412	0.0121092	0.0298283	0	0	2.5509	11.2591	SPON2;HSPA8;TUBA1C;HSP90AA1;HSPA5;CALR;ACTB;VCL;PDIA4	COVID 19
190	Top 500 downregulated genes in mouse liver with SARS-CoV-2 infection (Day 3) from GEO GSE162113	9/412	0.0121092	0.0298283	0	0	2.5509	11.2591	SPON2;HSPA8;TUBA1C;HSP90AA1;HSPA5;CALR;ACTB;VCL;PDIA4	COVID 19
191	Top 500 up genes for SARS-CoV-2 infection in Rhesus macaques at Group 1 dose in PBMCs at 14 DPI from GSE156701	10/460	0.00864059	0.0229713	0	0	2.54714	12.1022	LGALS3BP;VCAN;PKM;TPM1;MYH9;PRDX6;THBS1;TUBA8;CTSB;LTF	COVID 19
192	392 genes up-regulated by SARS-CoV-2 in ferret nasal wash from GSE147507	8/371	0.0188282	0.0441349	0	0	2.50776	9.96181	LGALS1;SERPINE1;CTSZ;ANXA5;TIMP1;PDIA4;TXNDC5;NME1	COVID 19
193	Top 500 up genes for SARS-CoV-2 infection Day 2 in ferret right cranial lung from GSE160824	9/419	0.013391	0.0324359	0	0	2.50644	10.8107	MYDGF;TPM3;CTSZ;COTL1;PGK1;QSOX1;TXN;B2M;CTHRC1	COVID 19
194	Top 500 down genes for SARS-CoV-2 infection Day 7 in ferret right cranial lung from GSE160824	9/421	0.0137751	0.0329996	0	0	2.49402	10.6866	COL1A2;DAAM1;FN1;TIMP2;BGN;APOA1;THBS1;VCL;FBN1	COVID 19
195	Top 500 downregulated genes for SARS-CoV-2 infection in human limbus from GSE164073	10/472	0.0102341	0.0264028	0	0	2.47944	11.3609	TAGLN;CALD1;ACTN1;TPM1;FSCN1;ACTN4;TACC2;MDGA1;ACTB;ACTG1	COVID 19
196	Top 500 up genes for SARS-CoV-2 infection in Rhesus macaques at Group 1 dose in Bronchoalveolar Lavage at 4 DPI from GSE156701	10/476	0.0108122	0.0274078	0	0	2.45765	11.126	C3;LGALS3BP;ECM1;GRN;COL3A1;COL1A2;LAMP1;IGFBP4;FN1;IGFBP7	COVID 19
200	500 genes down-regulated by SARS-CoV-2 in human Caco2 cells at 4h from GSE148729 mock	10/484	0.0120428	0.0298283	0	0	2.41517	10.6734	MYDGF;ANXA1;TPM1;COL5A2;APOA1;TXN;C4B_2;MFGE8;HSPE1;THBS1	COVID 19
201	541 proteins up-regualated at 24h in SARS-CoV-2 infected cells from Bouhaddou et al. 2020	11/537	0.00917022	0.0239414	0	0	2.40183	11.2689	PKM;ANXA2;NME2;HSPB1;MYH9;VIM;EEF2;PPIA;GAPDH;VCL;NME1	COVID 19
202	500 genes up-regulated by SARS-CoV-2 in human intestinal organoids from GSE149312 differentiation 60h	9/440	0.0178429	0.0422798	0	0	2.38174	9.58924	MT2A;COL4A2;RAB40C;SERPINF1;GSTP1;MYH9;ACTN4;CALR;P4HB	COVID 19
